# Supplementary material for: Synthesis and derivatization of an isomer of an N-heterotriangulene bearing five-, six- and seven-membered rings around the central nitrogen atom
Source: Royal Society of Chemistry journal article supplement (doi:10.1039/d4qo02027h), 2024-11-20
Supplement: d4qo02027h1.pdf [file d4qo02027h1.pdf]

## Table of Contents

|                                                         |     |
|---------------------------------------------------------|-----|
| 1. General Remarks.....                                 | S2  |
| 2. Experimental part.....                               | S2  |
| 3. NMR spectra .....                                    | S7  |
| 4. X-ray crystallographic structure determination ..... | S18 |
| 5. Delayed photoluminescence curves .....               | S20 |
| 6. Electrochemical property .....                       | S24 |
| 7. EPR spectra.....                                     | S27 |
| 8. The theoretical calculations .....                   | S28 |
| 9. References.....                                      | S61 |

## 1. General Remarks

All reagents and solvents were commercially available and were used without further purification unless otherwise noted. IR-Spectra were recorded as KBr-pellets on a Bruker VERTEX 80V spectrometer. NMR spectra were taken on Bruker AVANCE NEO (400MHz). Chemical shifts ( $\delta$ ) are reported in parts per million (ppm) relative to traces of  $\text{CHCl}_3$  in the corresponding deuterated solvent. HRMS experiments were carried out on a ThermoFisher LTQ Orbitrap XL. Crystal structure analysis was accomplished with a XtaLAB AFC12 (RINC): Kappa single diffractometer. Absorption spectra were recorded on a Shimadzu UV2600. Emission spectra, absolute quantum yields, as well as fluorescence lifetimes were measured on FluoroMax-4 spectrometer equipped with an integral sphere and a time-correlated single photon counting system with a NanoLED laser. Electrochemical data were obtained in dichloromethane solution of tetrabutylammonium hexafluorophosphate (0.1 M) and ferrocene was used as an internal standard. Cyclic voltammogram (CV) and differential pulse voltammograms (DPV) were obtained using a glassy carbon working electrode, a platinum counter electrode, and a Ag reference electrode tested on CHI660E station. Compound **4** was synthesized according to the previously reported method.<sup>[S1]</sup>

## 2. Experimental part

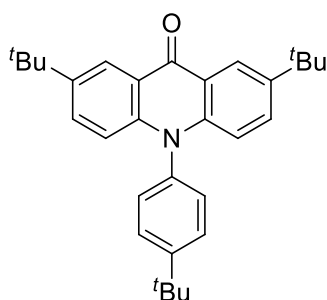

A 120 mL screw capped glass vial was charged with 2,7-di-*tert*-butylacridone **4** (1.95 g, 10 mmol), 4-*tert*-butyl-bromobenzene (2.34 g, 11 mmol), CuI (210 mg, 1.1 mmol),  $\text{K}_2\text{CO}_3$  (2.28 g, 16.5 mmol) and 2,2,6,6-tetramethylheptane-3,5-dione (405 mg, 2.2 mmol). Under the protection of argon, dry DMAc (30 mL) was added to the vial. After bubbling with argon for three minutes, the vial was quickly sealed. The vial was heated in an oil bath at 160 °C for 36 hours. After cooling down to room temperature, the mixture was diluted with dichloromethane (200 mL) and washed with water (3×200 mL). The solvent was removed by rotatory evaporation and

the crude product was purified by silica gel column chromatography (dichloromethane) to give product **5** (2.78 g, 6.32 mmol, 63%) as light-yellow solid. m.p. 260°C;  $^1\text{H}$  NMR (600 MHz,  $\text{CDCl}_3$ )  $\delta$  (ppm) = 8.59 (d,  $J = 2.5$  Hz, 2H), 7.69-7.66 (m, 2H), 7.58 (dd,  $J = 9.0, 2.5$  Hz, 2H), 7.27-7.24 (m, 2H), 6.76 (d,  $J = 9.0$  Hz, 2H), 1.39 (s, 18H);  $^{13}\text{C}$  NMR (150 MHz,  $\text{CDCl}_3$ )  $\delta$  (ppm) = 180.17, 148.41, 147.05, 146.65, 139.10, 136.35, 136.14, 131.10, 130.42, 129.08, 125.83, 124.27, 124.17, 122.25, 121.85, 121.73, 119.63, 117.00, 106.68, 35.55, 34.97, 34.88, 32.09, 31.76, 31.54; IR (KBr)  $\tilde{\nu}$  ( $\text{cm}^{-1}$ ) = 3433, 3035, 2960, 2903, 2868, 1644, 1608, 1553, 1509, 1488, 1395, 1363, 1328, 1300, 1259, 1204, 1169, 1148, 1110, 1019, 925, 874, 838, 818, 796, 588, 543, 492; HRMS(ESI) ( $m/z$ ):  $[\text{M}+\text{H}]^+$  calculated for  $\text{C}_{31}\text{H}_{38}\text{NO}$ , 440.2953; found, 440.2957.

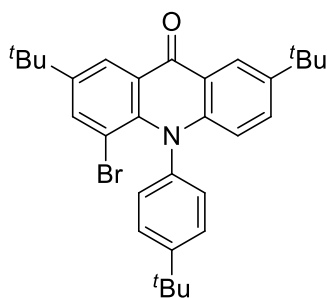

A 100 mL flask was charged with compound **5** (2.58 g, 5.88 mmol), dichloromethane (60 mL) and liquid bromine (4.69 g, 29.35 mmol). The mixture was stirred at room temperature for 1 hour and potassium carbonate (813 mg, 5.88 mmol) was added. The mixture was then stirred for another 15 hours and the reaction was quenched by adding the aqueous sodium sulfite solution. Additional dichloromethane (200 mL) was added to the reaction mixture, which was further washed with water (3×200 mL). The solvent was removed by rotary evaporation and the crude product was

purified by silica gel column chromatography (light petroleum/dichloromethane 2:3) to give product **6** (2.22 g, 4.29 mmol, 73%) as yellow solid. m.p. 222°C;  $^1\text{H}$  NMR (600 MHz,  $\text{CDCl}_3$ )  $\delta$  (ppm) = 8.65

(d,  $J = 2.6$  Hz, 1H), 8.51 (d,  $J = 2.5$  Hz, 1H), 7.91 (d,  $J = 2.5$  Hz, 1H), 7.58 (dd,  $J = 9.1, 2.5$  Hz, 1H), 7.53 (d,  $J = 8.4$  Hz, 2H), 7.27 (d,  $J = 8.4$  Hz, 2H), 7.05 (d,  $J = 9.1$  Hz, 1H), 1.41 (s, 9H), 1.39 (s, 9H), 1.37 (s, 9H);  $^{13}\text{C}$  NMR (150 MHz,  $\text{CDCl}_3$ )  $\delta$  (ppm) = 178.12, 152.68, 145.82, 145.25, 142.87, 139.54, 138.76, 138.08, 131.08, 126.45, 125.11, 123.71, 122.67, 121.12, 109.57, 34.99, 34.58, 34.52, 31.59, 31.37, 31.29; IR (KBr)  $\tilde{\nu}$  ( $\text{cm}^{-1}$ ) = 3437, 2960, 2905, 2869, 1643, 1614, 1598, 1508, 1489, 1465, 1396, 1364, 1317, 1271, 1202, 1153, 1113, 1021, 927, 883, 842, 819, 793, 762, 702, 625, 591, 454; HRMS(ESI) ( $m/z$ ):  $[\text{M}+\text{H}]^+$  calculated for  $\text{C}_{31}\text{H}_{37}\text{BrNO}$ , 518.2059; found, 518.2059.

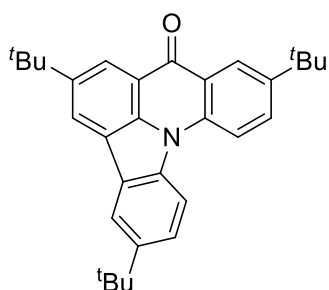

A 120 mL screw capped glass vial was charged with compound **6** (2.07 g, 4 mmol),  $\text{Pd}(\text{OAc})_2$  (54 mg, 0.24 mmol) and  $\text{K}_2\text{CO}_3$  (1.11 g, 8 mmol). Under the protection of argon, dry DMF (20 mL) and  $\text{PCy}_3\text{HBF}_4$  (177 mg, 0.48 mmol) were added to the vial. After bubbling with argon for three minutes, the vial was quickly sealed. The vial was heated in an oil bath at  $130^\circ\text{C}$  for 36 hours. After cooling down to room temperature, the mixture was diluted with dichloromethane (200 mL) and washed with water ( $3 \times 200$  mL). The solvent was removed by rotatory evaporation and the crude product was purified by silica gel column chromatography (dichloromethane/light petroleum ether 1:1) to give product **7** (1.66 g, 3.81 mmol, 95%) as cyan solid. m.p.  $261^\circ\text{C}$ ;  $^1\text{H}$  NMR (600 MHz,  $\text{CDCl}_3$ )  $\delta$  (ppm) = 8.70 (d,  $J = 2.4$  Hz, 1H), 8.52 (s, 1H), 8.45 (s, 1H), 8.36 (dd,  $J = 9.4, 3.1$  Hz, 1H), 8.21 (s, 1H), 8.20-8.16 (m, 1H), 7.93 (dd,  $J = 8.8, 2.3$  Hz, 1H), 7.66 (d,  $J = 8.7$  Hz, 1H), 1.56 (s, 9H), 1.51 (s, 9H), 1.48 (s, 9H);  $^{13}\text{C}$  NMR (150 MHz,  $\text{CDCl}_3$ )  $\delta$  (ppm) = 179.18, 146.60, 146.23, 146.14, 137.76, 137.63, 137.40, 131.70, 126.63, 125.36, 125.25, 125.13, 124.83, 122.67, 121.16, 119.17, 118.06, 115.37, 113.50, 35.56, 34.98, 34.89, 32.15, 31.89, 31.53; IR (KBr)  $\tilde{\nu}$  ( $\text{cm}^{-1}$ ) = 3435, 2961, 2904, 2868, 1654, 1612, 1556, 1492, 1417, 1393, 1363, 1310, 1291, 1266, 1203, 1151, 876, 805, 623, 593; HRMS(ESI) ( $m/z$ ):  $[\text{M}+\text{H}]^+$  calculated for  $\text{C}_{31}\text{H}_{36}\text{NO}$ , 438.2797; found, 438.2797.

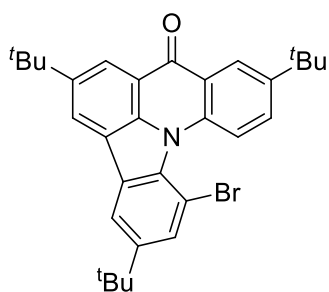

A 100 mL flask was charged with compound **7** (144 mg, 0.33 mmol), dichloromethane (6 mL) and liquid bromine (210 mg, 1.32 mmol). The mixture was stirred at room temperature for 1 hour and potassium carbonate (92 mg, 0.66 mmol) was added. The mixture was then stirred for another 15 hours and the reaction was quenched by adding the aqueous sodium sulfite solution. Additional dichloromethane (100 mL) was added to the reaction mixture, which was further washed with water ( $3 \times 100$  mL). The solvent was removed by rotary evaporation and the crude product was purified by silica gel column chromatography (light petroleum/dichloromethane 2:3) to give product **8** (145 mg, 0.28 mmol, 85%) as yellow solid. m.p.  $266^\circ\text{C}$ ;  $^1\text{H}$  NMR (600 MHz,  $\text{CDCl}_3$ )  $\delta$  (ppm) = 8.54 (d,  $J = 2.4$  Hz, 1H), 8.44 (d,  $J = 1.7$  Hz, 1H), 8.36 (d,  $J = 1.8$  Hz, 1H), 8.19 (d,  $J = 8.7$  Hz, 1H), 8.14 (d,  $J = 1.8$  Hz, 1H), 7.80 (d,  $J = 1.8$  Hz, 1H), 7.78 (dd,  $J = 8.8, 2.5$  Hz, 1H), 1.53 (s, 9H), 1.50 (s, 9H), 1.45 (s, 9H);  $^{13}\text{C}$  NMR (150 MHz,  $\text{CDCl}_3$ )  $\delta$  (ppm) = 78.39, 152.72, 144.19, 141.30, 136.41, 131.20, 129.46, 127.80, 122.77, 121.31, 116.75, 35.02, 34.56, 31.50, 31.43; IR (KBr)  $\tilde{\nu}$  ( $\text{cm}^{-1}$ ) = 3434, 2960, 2903, 2867, 1653, 1611, 1542, 1487, 1461, 1392, 1364, 1343, 1301, 1281, 1253, 1202, 1171, 1137, 1097, 1080, 882, 867, 827, 794, 633, 598, 493; HRMS(ESI) ( $m/z$ ):  $[\text{M}+\text{Na}]^+$  calculated for  $\text{C}_{31}\text{H}_{34}\text{BrNONa}$ , 538.1721; found, 538.1722.

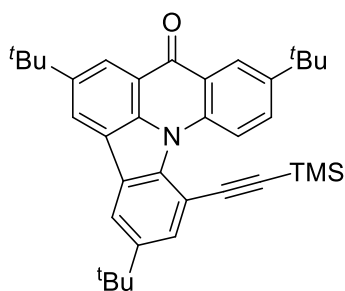

A 120 mL screw capped glass vial was charged with compound **8** (717 mg, 1.39 mmol), CuI (3 mg, 0.016 mmol) and PdCl<sub>2</sub>(PPh<sub>3</sub>)<sub>2</sub> (20 mg, 0.028 mmol). Under the protection of argon, dry triethylamine (7 mL) and trimethylsilylacetylene (273 mg, 2.78 mmol) were added to the vial. After bubbling with argon for three minutes, the vial was quickly sealed. The vial was heated in an oil bath at 85 °C for 16 hours. After cooling down to room temperature, the mixture was diluted with dichloromethane (200 mL) and washed with water (3×200 mL). The solvent was removed by rotatory evaporation and the crude product was

purified by silica gel column chromatography (dichloromethane/light petroleum ether 1:1) to give product **9** (738 mg, 1.38 mmol, 99%) as yellow solid. m.p. 315°C; <sup>1</sup>H NMR (600 MHz, CD<sub>2</sub>Cl<sub>2</sub>) δ (ppm) = 8.62 (d, *J* = 2.5 Hz, 1H), 8.48-8.44 (m, 2H), 8.41 (s, 1H), 8.38 (d, *J* = 8.8 Hz, 1H), 8.22 (s, 1H), 7.99 (dd, *J* = 8.8, 2.5 Hz, 1H), 1.69 (s, 9H), 1.55 (s, 9H), 1.48 (s, 9H), 0.34 (s, 9H); <sup>13</sup>C NMR (150 MHz, CD<sub>2</sub>Cl<sub>2</sub>) δ (ppm) = 178.85, 147.55, 147.25, 146.80, 138.18, 137.68, 137.42, 132.14, 126.86, 125.17, 125.10, 125.08, 123.23, 121.62, 121.30, 120.78, 119.55, 118.89, 115.90, 107.63, 101.51, 36.32, 35.75, 35.07, 32.11, 31.51, 30.35; IR (KBr)  $\tilde{\nu}$  (cm<sup>-1</sup>) = 3433, 2958, 2905, 2870, 2145, 1659, 1615, 1565, 1492, 1414, 1363, 1307, 1268, 1251, 1158, 1050, 908, 880, 860, 841, 799, 758, 676, 640, 591, 527; HRMS(ESI) (*m/z*): [M+Na]<sup>+</sup> calculated for C<sub>36</sub>H<sub>43</sub>NOSiNa, 556.3012; found, 556.3003.

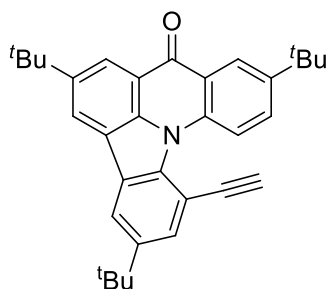

A 100 mL flask was charged with compound **9** (738 mg, 1.38 mmol), K<sub>2</sub>CO<sub>3</sub> (573 mg, 4.15 mmol), methanol (7 mL) and THF (7 mL). The mixture was stirred at room temperature for 16 hours. The reaction mixture was diluted with dichloromethane (150 mL) and washed with water (3×150 mL). The solvent was removed by rotatory evaporation and the crude product was purified by silica gel column chromatography (light petroleum/dichloromethane 1:1) to give product **10** (635 mg, 1.37 mmol, 99%) as yellow solid. m.p.=155°C; <sup>1</sup>H NMR (600 MHz, DMSO-*d*<sub>6</sub>) δ (ppm) = 8.91 (s, 1H), 8.80 (d, *J* = 8.8 Hz, 1H), 8.68 (s, 1H), 8.38 (d, *J* =

2.4 Hz, 1H), 8.25 (s, 1H), 7.96 (d, *J* = 8.9 Hz, 1H), 7.79 (s, 1H), 4.91 (s, 1H), 1.50 (s, 9H), 1.47 (s, 9H), 1.41 (s, 9H). <sup>13</sup>C NMR (150 MHz, CD<sub>2</sub>Cl<sub>2</sub>) δ (ppm) = 179.63, 147.22, 147.05, 146.83, 138.70, 137.52, 136.92, 132.66, 129.62, 128.51, 125.64, 124.76, 124.22, 122.68, 121.47, 121.36, 119.75, 119.68, 108.15, 87.23, 83.26, 35.73, 35.06, 35.04, 32.13, 31.72, 31.57. IR (KBr)  $\tilde{\nu}$  (cm<sup>-1</sup>) = 3435, 3306, 2960, 2904, 2868, 1655, 1611, 1554, 1488, 1461, 1387, 1364, 1308, 1283, 1253, 1198, 1098, 1049, 873, 822, 794, 639, 599, 521, 491. HRMS(ESI) (*m/z*): [M+H]<sup>+</sup> calculated for C<sub>33</sub>H<sub>36</sub>NO, 462.2797; found, 462.2797.

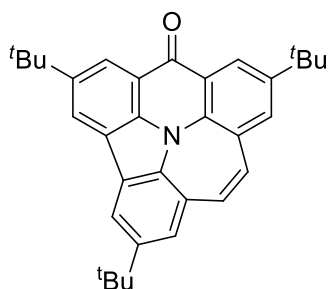

A 120 mL screw capped glass vial was charged with compound **10** (526 mg, 1.14 mmol), PtCl<sub>2</sub> (15 mg, 0.057 mmol) and toluene (6 mL). The vial was sealed and heated in an oil bath at 100 °C for 36 hours. After cooling down to room temperature, the mixture was diluted with dichloromethane (150 mL) and washed with water (3×150 mL). The solvent was removed by rotatory evaporation and the crude product was purified by silica gel column chromatography (dichloromethane/light petroleum ether 1:1) to give product **11** (328 mg, 0.71 mmol, 62%) as orange solid. m.p. 250°C;

<sup>1</sup>H NMR (600 MHz, CD<sub>2</sub>Cl<sub>2</sub>) δ (ppm) = 8.30 (d, *J* = 1.8 Hz, 1H), 8.26 (d, *J* = 1.8 Hz, 1H), 8.10 (d, *J* = 2.5 Hz, 1H), 7.61 (d, *J* = 1.9 Hz, 1H), 7.05 (d, *J* = 2.5 Hz, 1H), 6.77 (d, *J* = 1.9 Hz, 1H), 5.88-5.77 (m, 2H), 1.51 (s, 9H), 1.37 (s, 9H), 1.35 (s, 9H). <sup>13</sup>C NMR (150 MHz, CD<sub>2</sub>Cl<sub>2</sub>) δ (ppm) = 178.04, 147.95, 147.45, 146.90, 140.58, 139.80, 136.31, 136.08, 132.62, 129.93, 128.48, 126.82, 126.21, 126.20, 126.07, 125.24, 125.10, 122.89, 120.71, 118.68, 117.96, 35.64, 34.75, 34.56, 32.07, 31.45, 31.04. IR (KBr)  $\tilde{\nu}$  (cm<sup>-1</sup>) = 3435, 2958, 2904, 2867, 1653, 1596, 1559, 1477, 1446,

1391, 1361, 1298, 1272, 1255, 1233, 1202, 1176, 1015, 954, 895, 866, 795, 752, 714, 633, 575. HRMS(ESI) ( $m/z$ ):  $[M+Na]^+$  calculated for  $C_{33}H_{35}NONa$ , 484.2616; found, 484.2609.

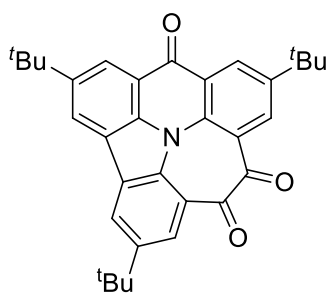

**Method A:** A 38 mL screw capped glass vial was charged with compound **11** (160 mg, 0.35 mmol),  $SeO_2$  (77 mg, 0.69 mmol) and *o*-dichlorobenzene (1 mL). The vial was sealed and heated in an oil bath at 120 °C for 2 days. After cooling down to room temperature, the mixture was diluted with dichloromethane (100 mL) and washed with water ( $3 \times 100$  mL). The solvent was removed by rotatory evaporation and the crude product was purified by silica gel column chromatography (dichloromethane/light petroleum ether 1:1) to give product **12** (34 mg, 0.069 mmol, 20%) as orange solid.

**Method B:** A 38 mL screw capped glass vial was charged with compound **11** (133 mg, 0.29 mmol), benzeneseleninic acid anhydride (114 mg, 0.32 mmol) and toluene (3 mL). The vial was sealed and heated in an oil bath at 140 °C for 36 hours. After cooling down to room temperature, the mixture was diluted with dichloromethane (150 mL) and washed with water ( $3 \times 150$  mL). The solvent was removed by rotatory evaporation and the crude product was purified by silica gel column chromatography (dichloromethane/light petroleum ether 1:1) to give product **12** (134 mg, 0.27 mmol, 94%) as orange solid. m.p. 315 °C;  $^1H$  NMR (600 MHz,  $DMSO-d_6$ )  $\delta$  (ppm) = 9.04 (dd,  $J = 5.9, 1.9$  Hz, 2H), 8.86 (d,  $J = 2.6$  Hz, 1H), 8.48 (d,  $J = 2.6$  Hz, 1H), 8.29 (d,  $J = 1.8$  Hz, 1H), 8.20 (d,  $J = 2.0$  Hz, 1H), 1.53 (s, 9H), 1.51 (s, 9H), 1.47 (s, 9H).  $^{13}C$  NMR (150 MHz,  $C_6D_6$ )  $\delta$  (ppm) = 190.74, 187.93, 177.59, 148.47, 148.40, 147.96, 138.09, 135.41, 135.38, 133.43, 132.61, 127.58, 126.27, 125.86, 125.50, 124.90, 124.13, 122.67, 122.24, 120.03, 119.67, 35.42, 35.07, 34.90, 31.82, 31.48, 31.04. IR (KBr)  $\tilde{\nu}$  ( $cm^{-1}$ ) = 3433, 2961, 2870, 1657, 1616, 1591, 1554, 1481, 1409, 1364, 1306, 1273, 1258, 1230, 1200, 1163, 1100, 1018, 911, 889, 847, 824, 793, 757, 634, 572, 414. HRMS(ESI) ( $m/z$ ):  $[M+Na]^+$  calculated for  $C_{33}H_{33}NO_3Na$ , 514.2358; found, 514.2363.

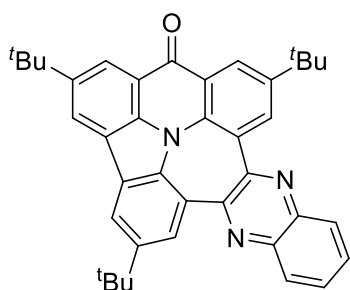

A 120 mL screw capped glass vial was charged with compound **12** (325 mg, 0.66 mmol), benzene-1,2-diamine (93 mg, 0.86 mmol), chloroform (13 mL) and acetic acid (7 mL). The vial was sealed and heated in an oil bath at 80 °C for 40 hours. After cooling down to room temperature, the mixture was diluted with dichloromethane (200 mL) and washed with water ( $3 \times 200$  mL). The solvent was removed by rotatory evaporation and the crude product was purified by silica gel column chromatography (dichloromethane/light petroleum ether 3:2) to give product **13** (283 mg, 0.5 mmol, 76%) as yellow solid. m.p. 190 °C;

$^1H$  NMR (600 MHz,  $DMSO-d_6$ )  $\delta$  (ppm) = 8.98 (d,  $J = 2.6$  Hz, 1H), 8.84 (d,  $J = 1.9$  Hz, 1H), 8.78 (d,  $J = 1.8$  Hz, 1H), 8.44 (dd,  $J = 13.4, 2.3$  Hz, 2H), 8.17 (d,  $J = 1.8$  Hz, 1H), 7.97 (t,  $J = 8.6$  Hz, 2H), 7.80-7.72 (m, 2H), 1.50 (s, 9H), 1.48 (s, 9H), 1.42 (s, 9H).  $^{13}C$  NMR (150 MHz,  $CD_2Cl_2$ )  $\delta$  (ppm) = 178.30, 149.88, 148.70, 147.92, 147.85, 147.71, 142.41, 141.53, 138.86, 138.48, 137.86, 137.62, 130.77, 130.33, 129.60, 129.22, 128.58, 127.47, 126.67, 126.63, 125.88, 125.23, 123.06, 122.92, 120.93, 120.89, 119.24, 35.72, 35.38, 35.20, 32.08, 31.76, 31.35. IR (KBr)  $\tilde{\nu}$  ( $cm^{-1}$ ) = 3436, 2959, 2904, 2868, 1657, 1598, 1559, 1479, 1405, 1364, 1329, 1275, 1239, 1200, 1168, 1120, 1103, 906, 878, 793, 757, 578. HRMS(ESI) ( $m/z$ ):  $[M+Na]^+$  calculated for  $C_{39}H_{37}N_3ONa$ , 586.2834; found, 586.2823.

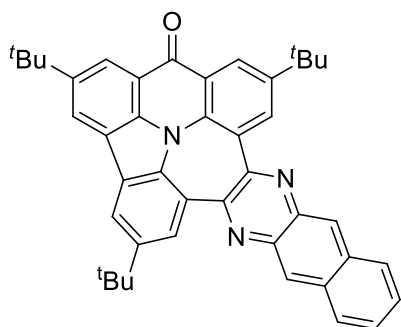

A 38 mL screw capped glass vial was charged with compound **12** (34 mg, 0.069 mmol), naphthalene-2,3-diamine (15 mg, 0.09 mmol), chloroform (2 mL) and acetic acid (1 mL). The vial was sealed and heated in an oil bath at 80 °C for 40 hours. After cooling down to room temperature, the mixture was diluted with dichloromethane (50 mL) and washed with water (3×50 mL). The solvent was removed by rotatory evaporation and the crude product was purified by silica gel column chromatography (dichloromethane/light petroleum ether 3:1) to give product **14** (36 mg, 0.058 mmol, 84%) as orange solid. m.p. > 400°C (dec.); <sup>1</sup>H NMR (600 MHz, CD<sub>2</sub>Cl<sub>2</sub>) δ (ppm) = 9.20

(dd, *J* = 5.2, 2.3 Hz, 2H), 8.74 (d, *J* = 2.6 Hz, 1H), 8.62 (d, *J* = 5.8 Hz, 2H), 8.49 (d, *J* = 1.8 Hz, 1H), 8.44 (d, *J* = 1.8 Hz, 1H), 8.25 (d, *J* = 2.0 Hz, 1H), 8.08 (dt, *J* = 5.4, 3.3 Hz, 2H), 7.58-7.52 (m, 2H), 1.59 (s, 9H), 1.57 (s, 9H), 1.55 (s, 9H). <sup>13</sup>C NMR (150 MHz, CD<sub>2</sub>Cl<sub>2</sub> + CS<sub>2</sub>) δ (ppm) = 177.68, 150.51, 149.10, 147.74, 147.72, 139.23, 138.62, 138.31, 138.25, 138.08, 137.82, 135.19, 134.89, 129.49, 129.08, 129.06, 128.24, 127.73, 127.39, 127.30, 127.29, 126.65, 126.14, 125.39, 123.08, 122.78, 121.42, 121.27, 119.59, 35.70, 35.45, 35.28, 32.36, 32.10, 31.67. IR (KBr)  $\tilde{\nu}$  (cm<sup>-1</sup>) = 3434, 2958, 2867, 1657, 1637, 1597, 1558, 1481, 1405, 1364, 1333, 1307, 1265, 1201, 1166, 1102, 875, 793, 740, 583, 513, 485. HRMS(ESI) (*m/z*): [M+H]<sup>+</sup> calculated for C<sub>43</sub>H<sub>39</sub>N<sub>3</sub>O, 614.3171; found, 614.3165.

Chemical oxidation of **11**: The solution of AgSbF<sub>6</sub> (15 mg, 0.044 mmol) in dry dichloromethane (10 mL) was added to the solution of compound **11** (20 mg, 0.043) in dry dichloromethane (10 mL) under the protection of Argon. The solution was stirred at room temperature for 1 hour and the color was changed from dark blue to blackish green. The solution was filtered through a syringe and the solvent was removed under reduced pressure. The residue was further washed with hexane (5 mL) to afford **11**<sup>+</sup> quantitatively as a dark brown solid. Elemental anal. calculated for C<sub>33</sub>H<sub>35</sub>F<sub>6</sub>NOSb: C 56.83 H 5.06 N 2.01, found: C 56.92 H 4.95 N 2.07.

### 3. NMR spectra

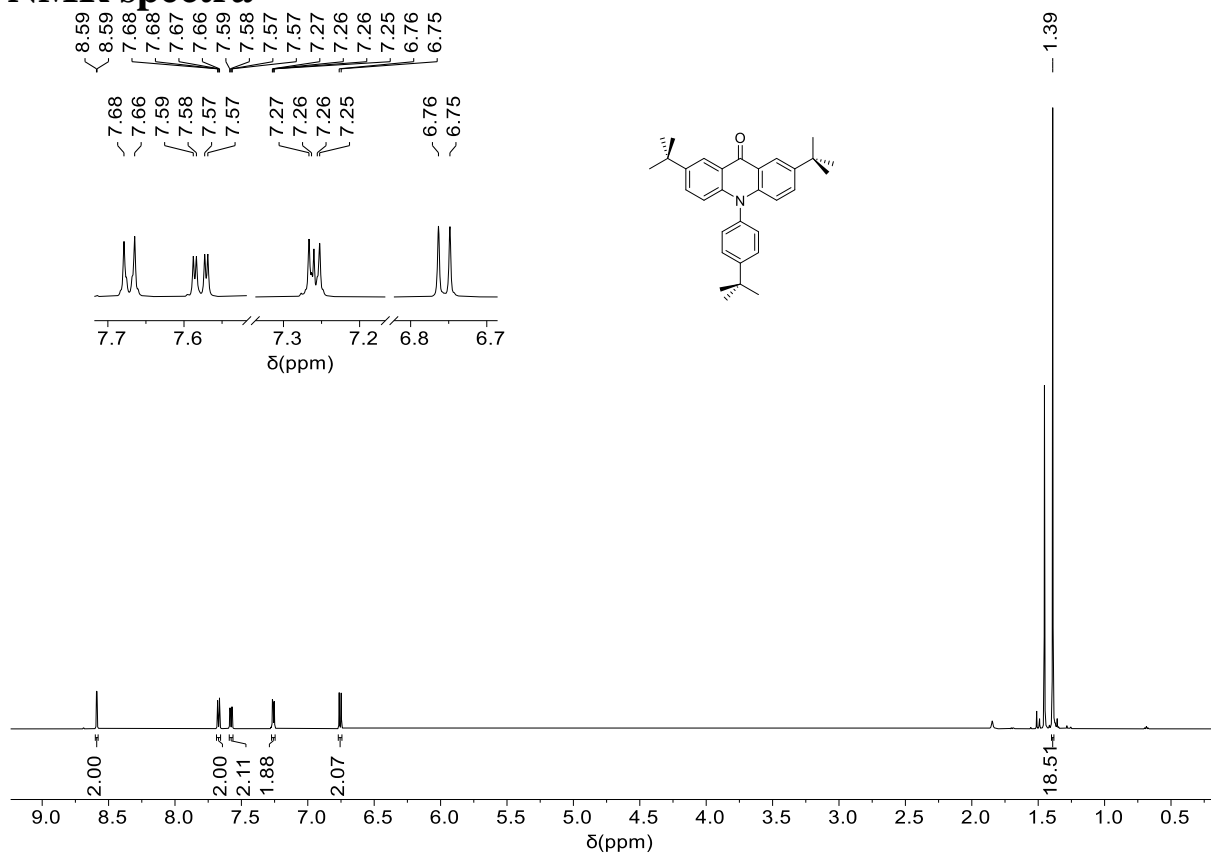

Figure S1. <sup>1</sup>H NMR spectrum (600 MHz, CDCl<sub>3</sub>) of compound 5.

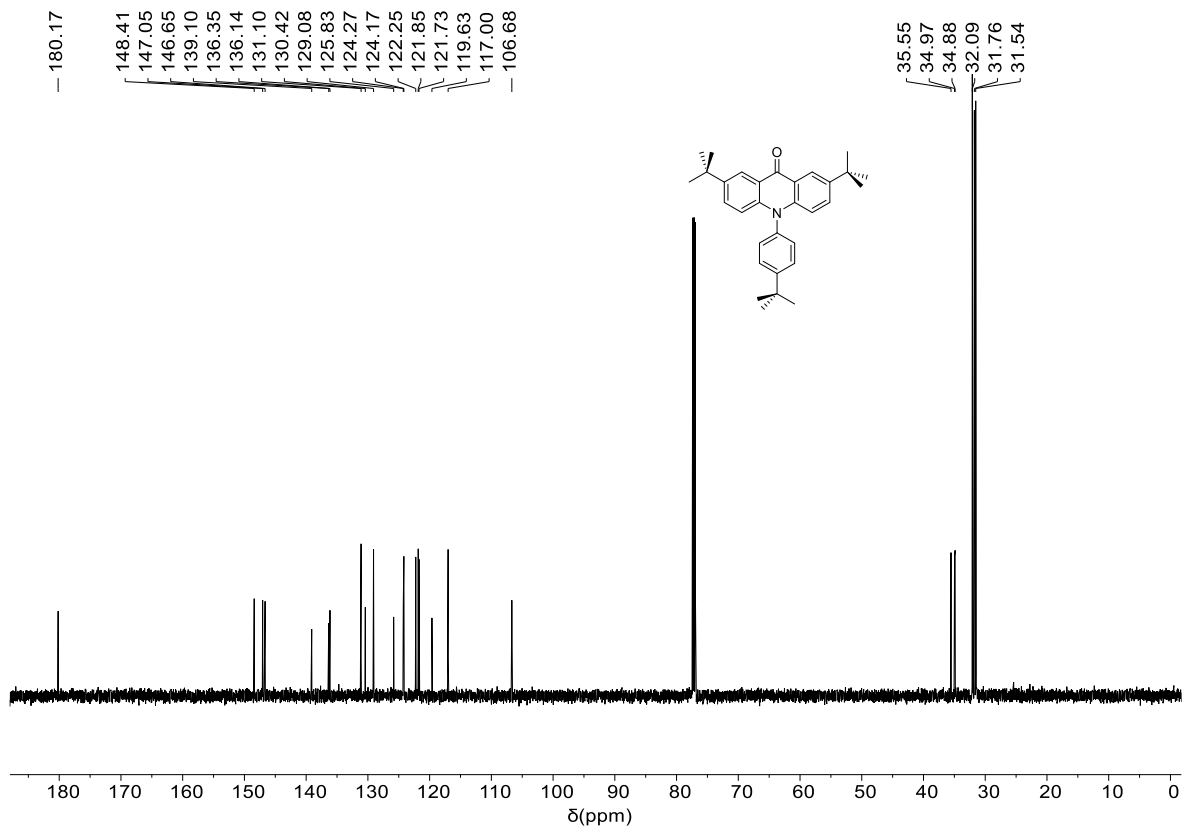

Figure S2. <sup>13</sup>C NMR spectrum (150 MHz, CDCl<sub>3</sub>) of compound 5.

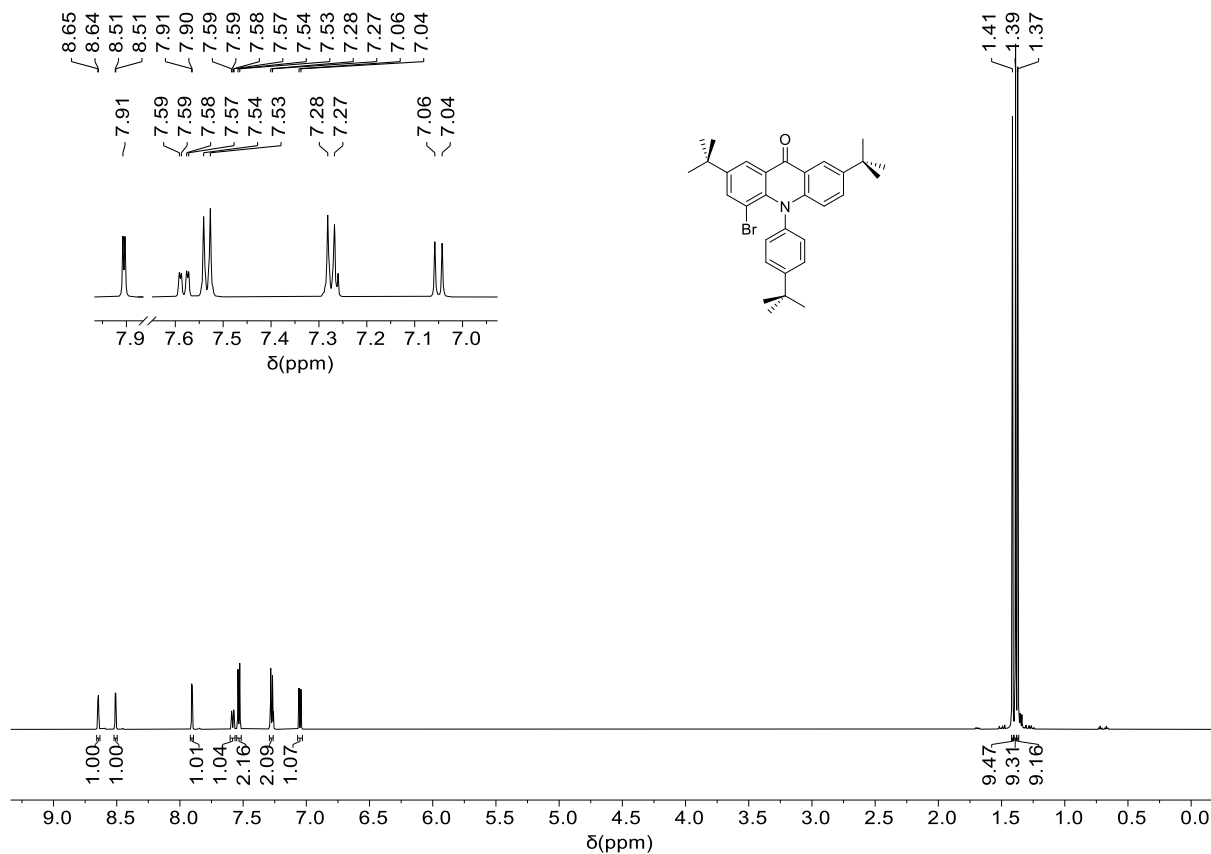

**Figure S3.** <sup>1</sup>H NMR spectrum (600 MHz, CDCl<sub>3</sub>) of compound 6.

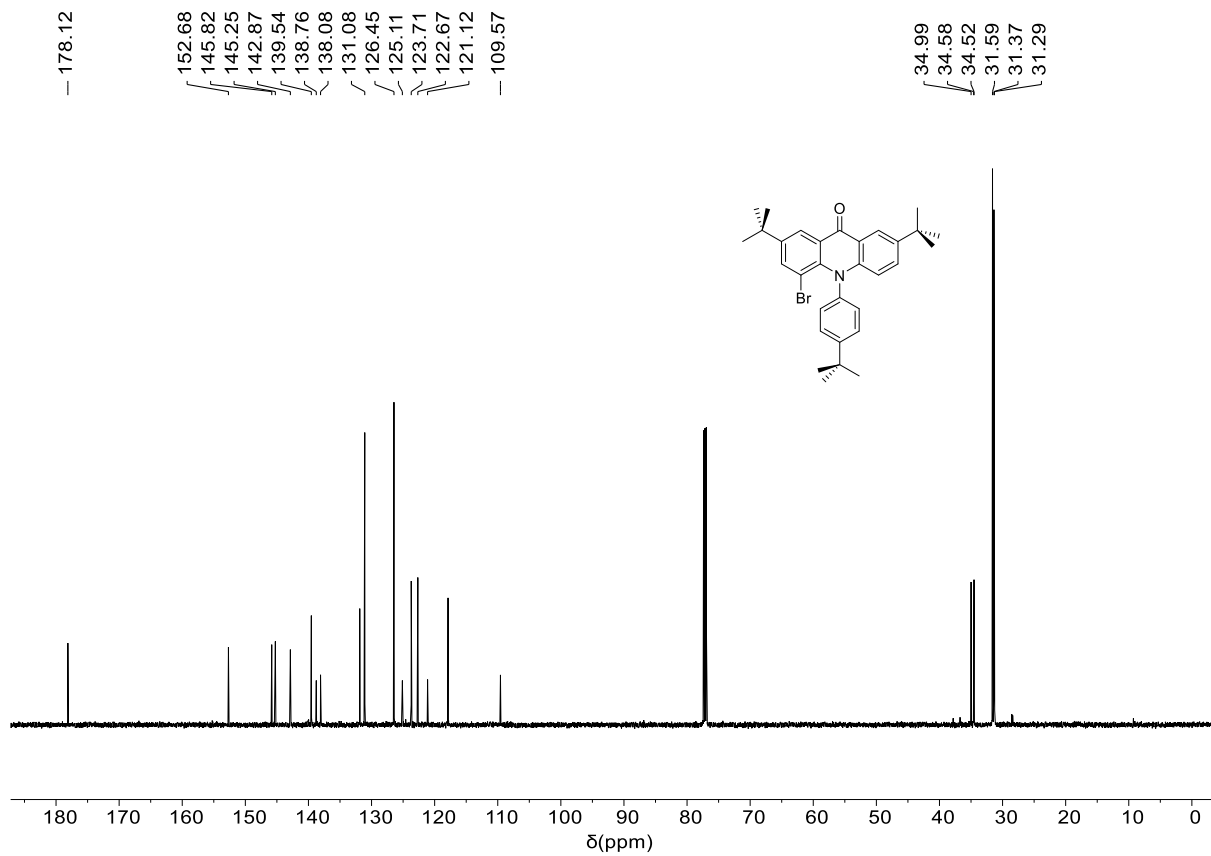

**Figure S4.** <sup>13</sup>C NMR spectrum (150 MHz, CDCl<sub>3</sub>) of compound 6.



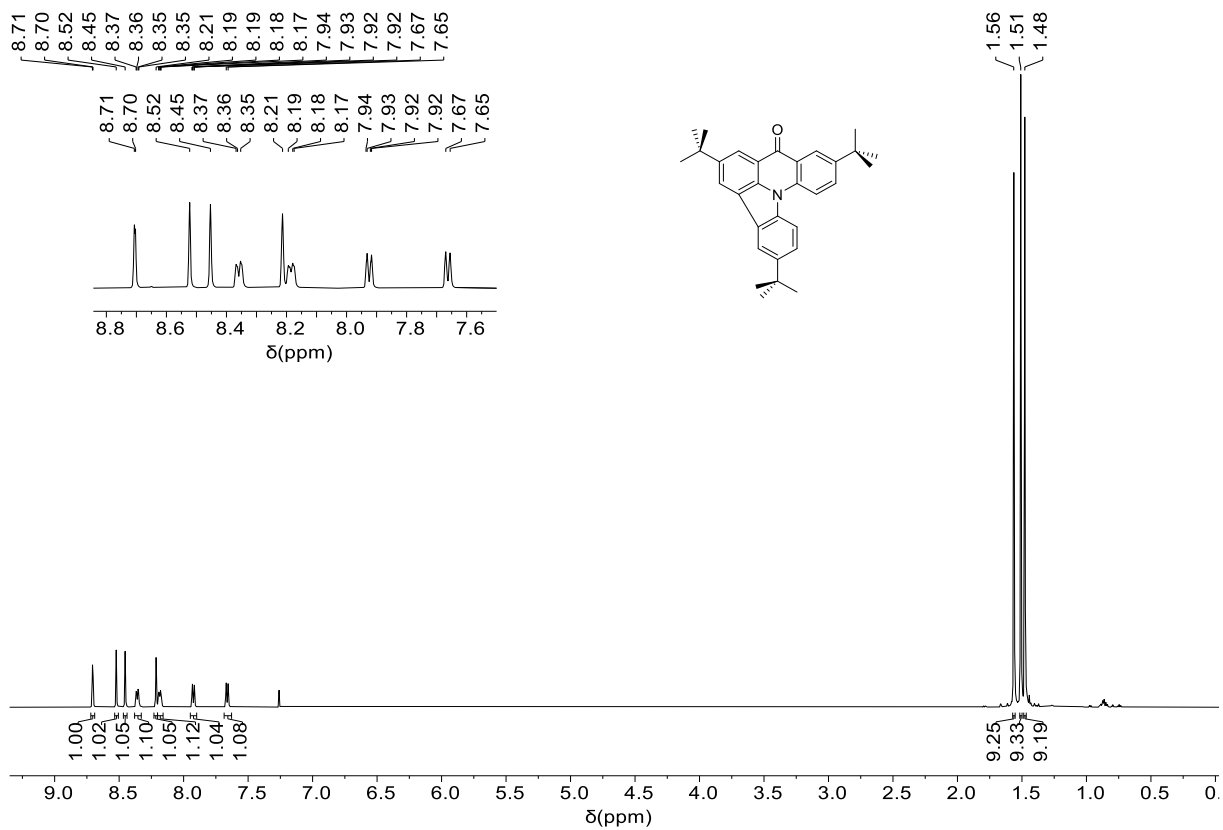

**Figure S5.** <sup>1</sup>H NMR spectrum (600 MHz, CDCl<sub>3</sub>) of compound **7**.

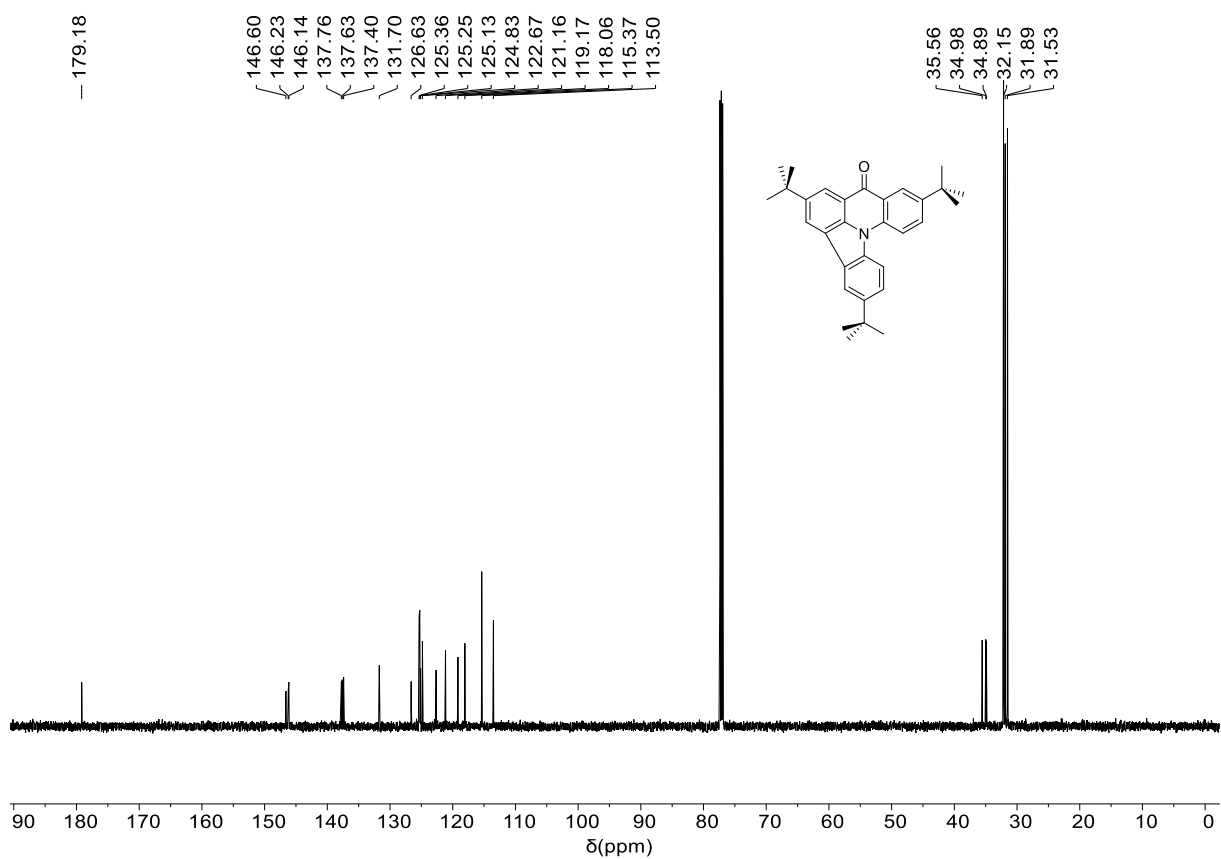

**Figure S6.** <sup>13</sup>C NMR spectrum (150 MHz, CDCl<sub>3</sub>) of compound **7**.

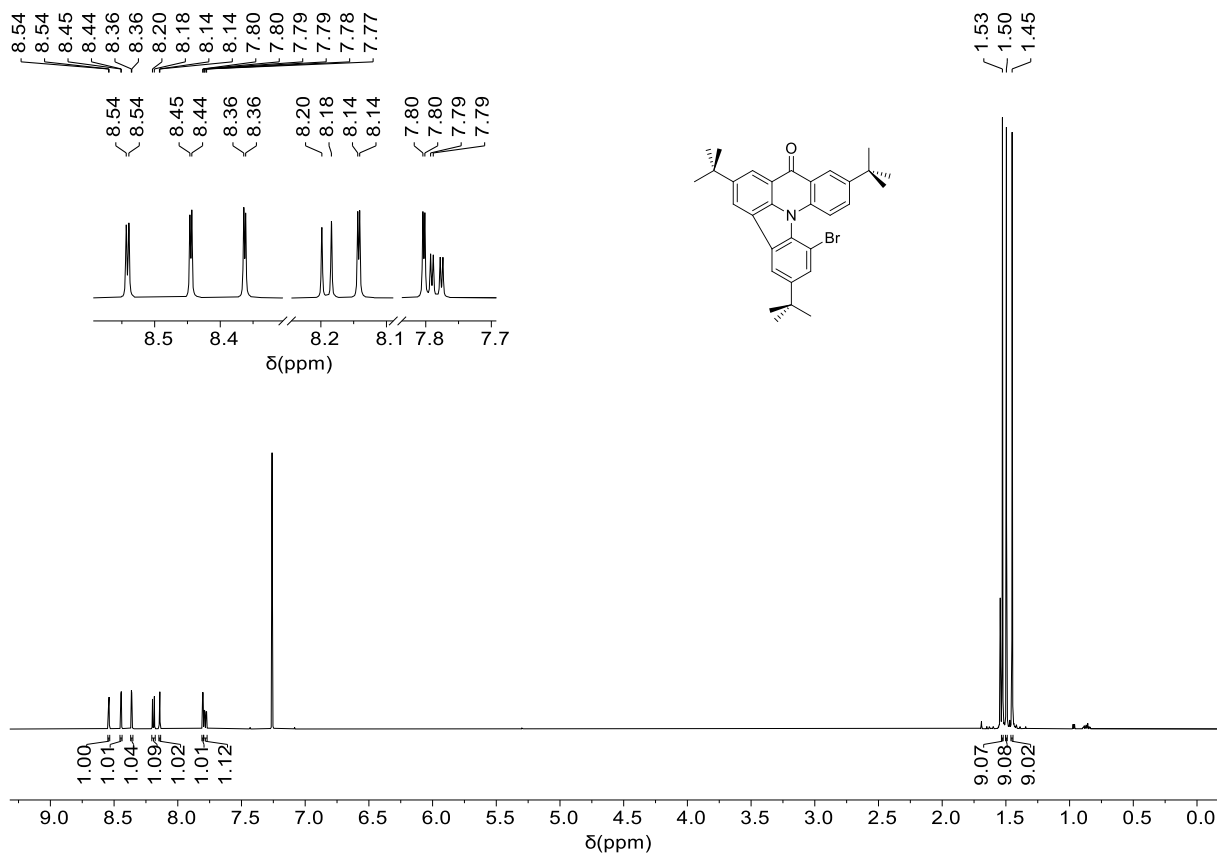

**Figure S7.**  $^1\text{H}$  NMR spectrum (600 MHz,  $\text{CDCl}_3$ ) of compound **8**.

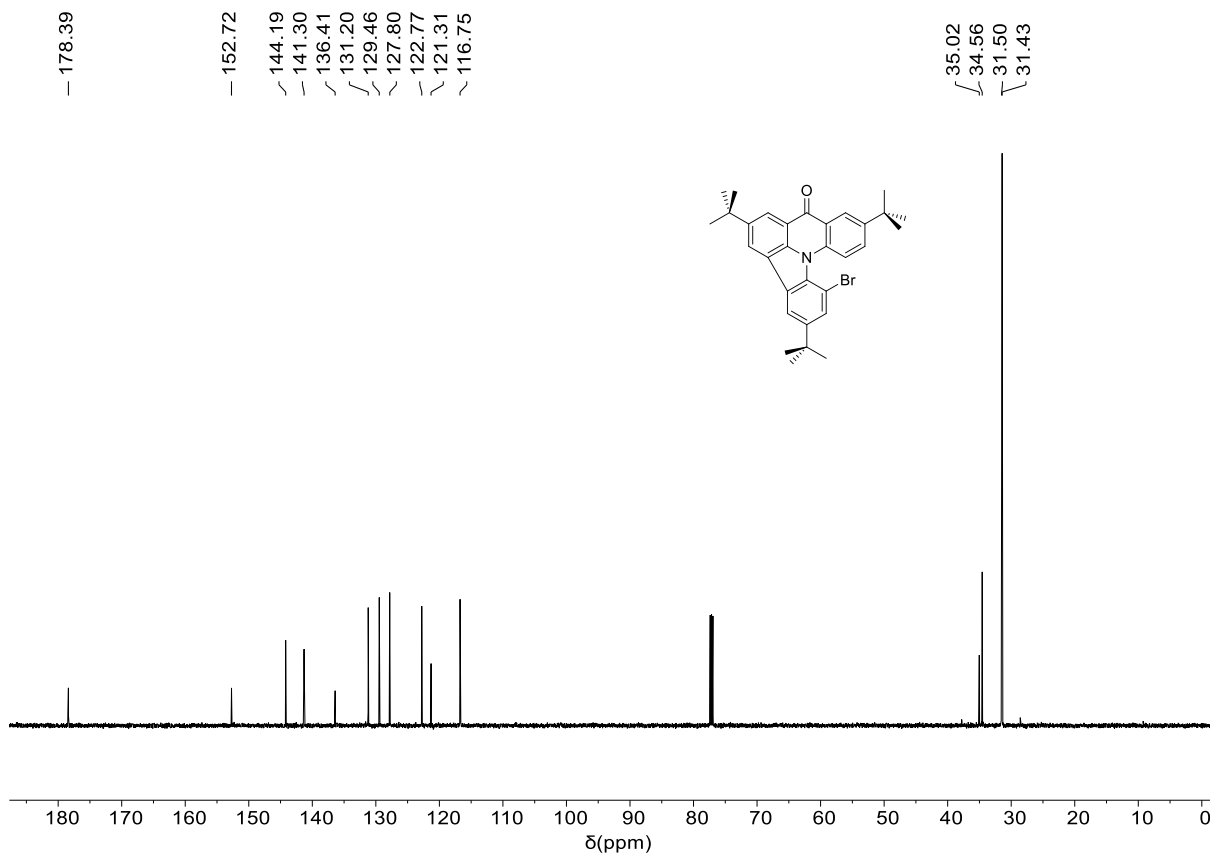

**Figure S8.**  $^{13}\text{C}$  NMR spectrum (150 MHz,  $\text{CDCl}_3$ ) of compound **8**.

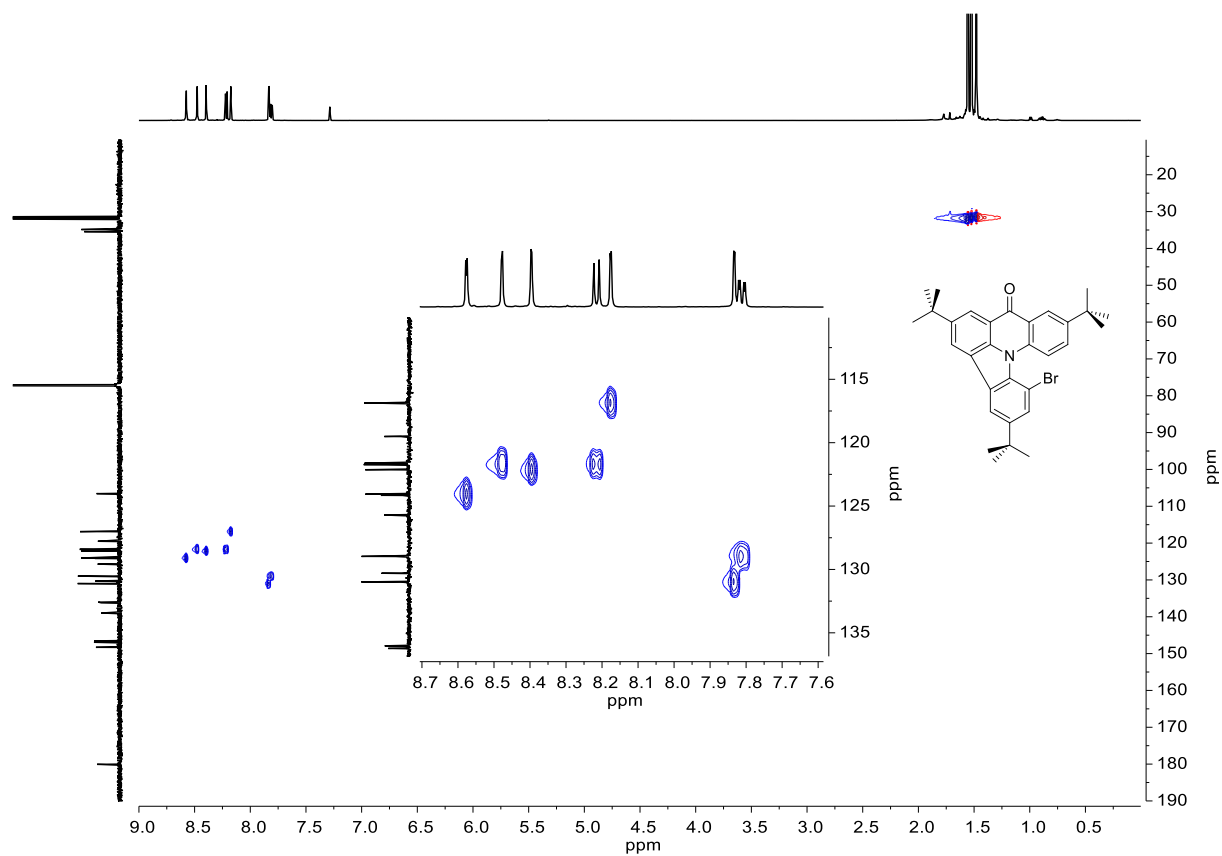

**Figure S9.** HSQC NMR spectrum of compound **8**.

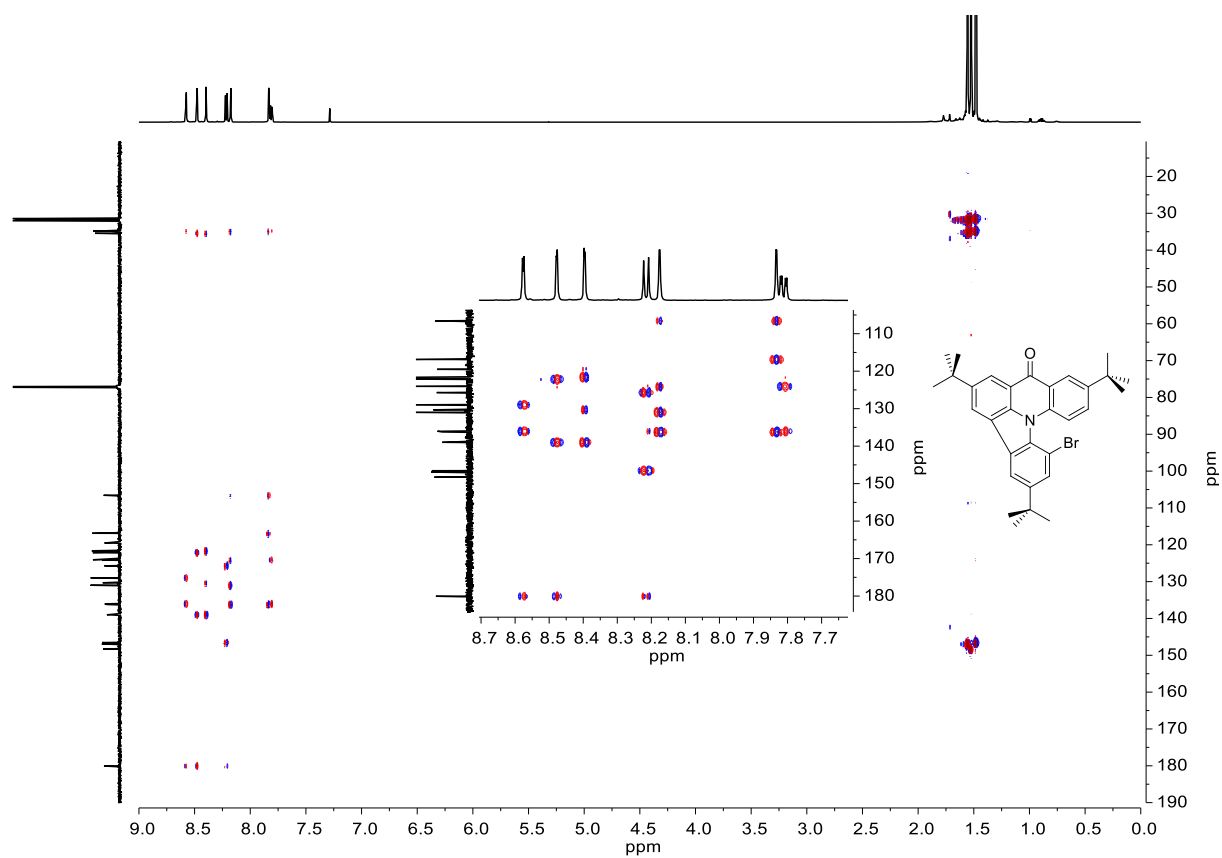

**Figure S10.** HMBC NMR spectrum of compound **8**.

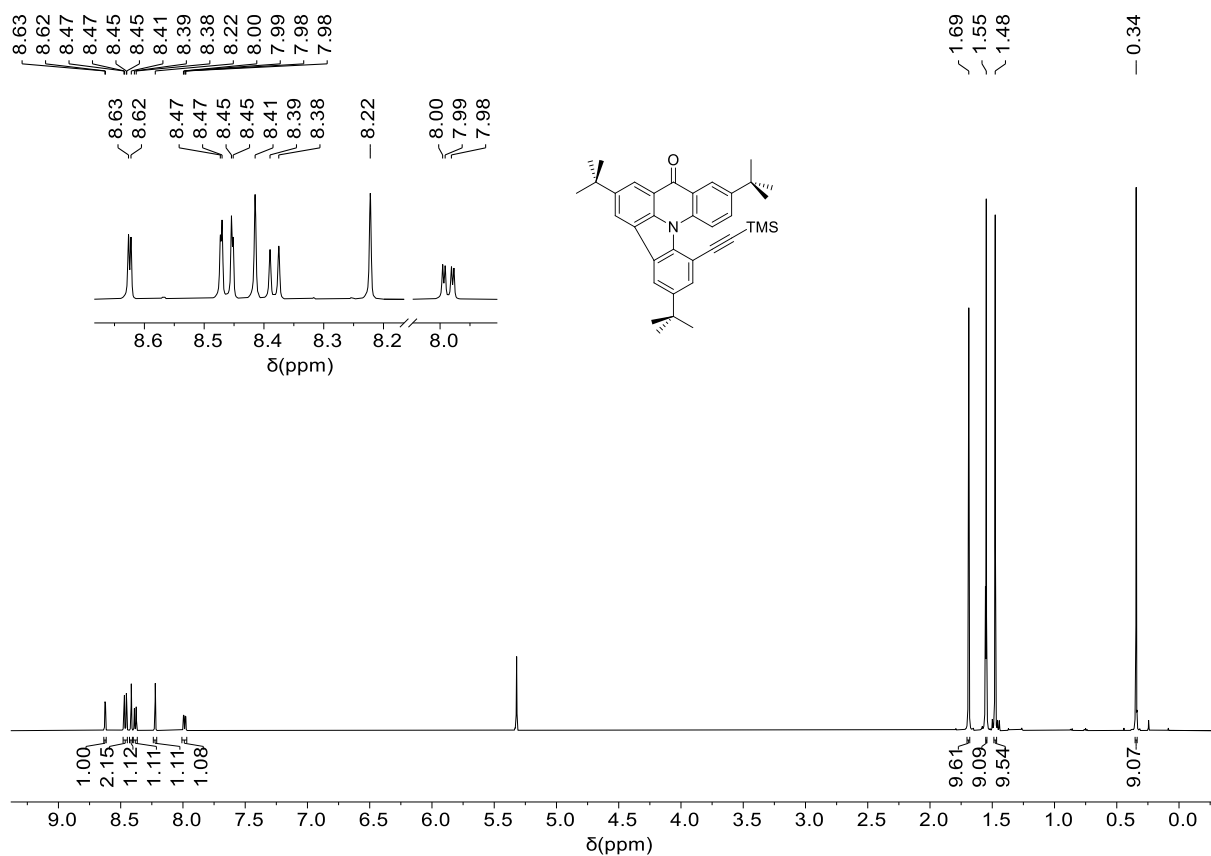

**Figure S11.** <sup>1</sup>H NMR spectrum (600 MHz, CD<sub>2</sub>Cl<sub>2</sub>) of compound 9.

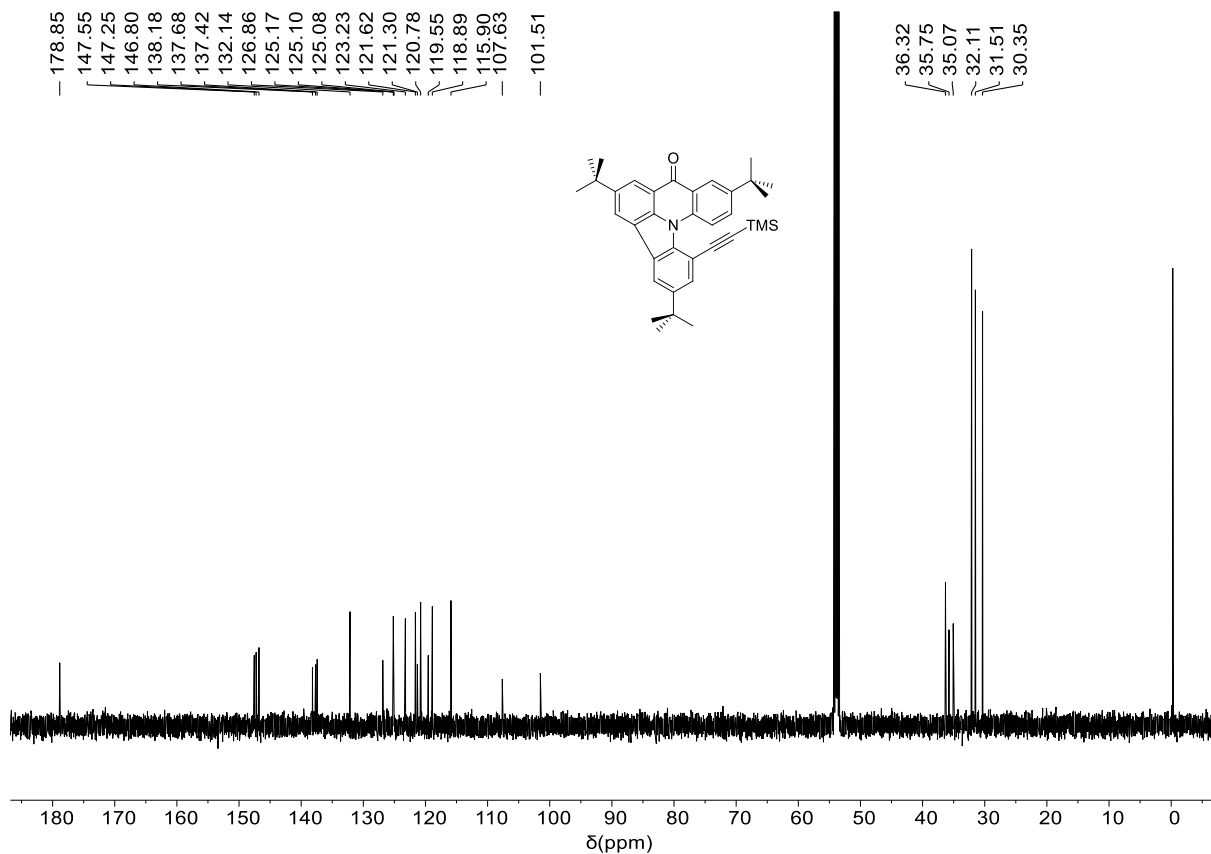

**Figure S12.** <sup>13</sup>C NMR spectrum (150 MHz, CD<sub>2</sub>Cl<sub>2</sub>) of compound 9.

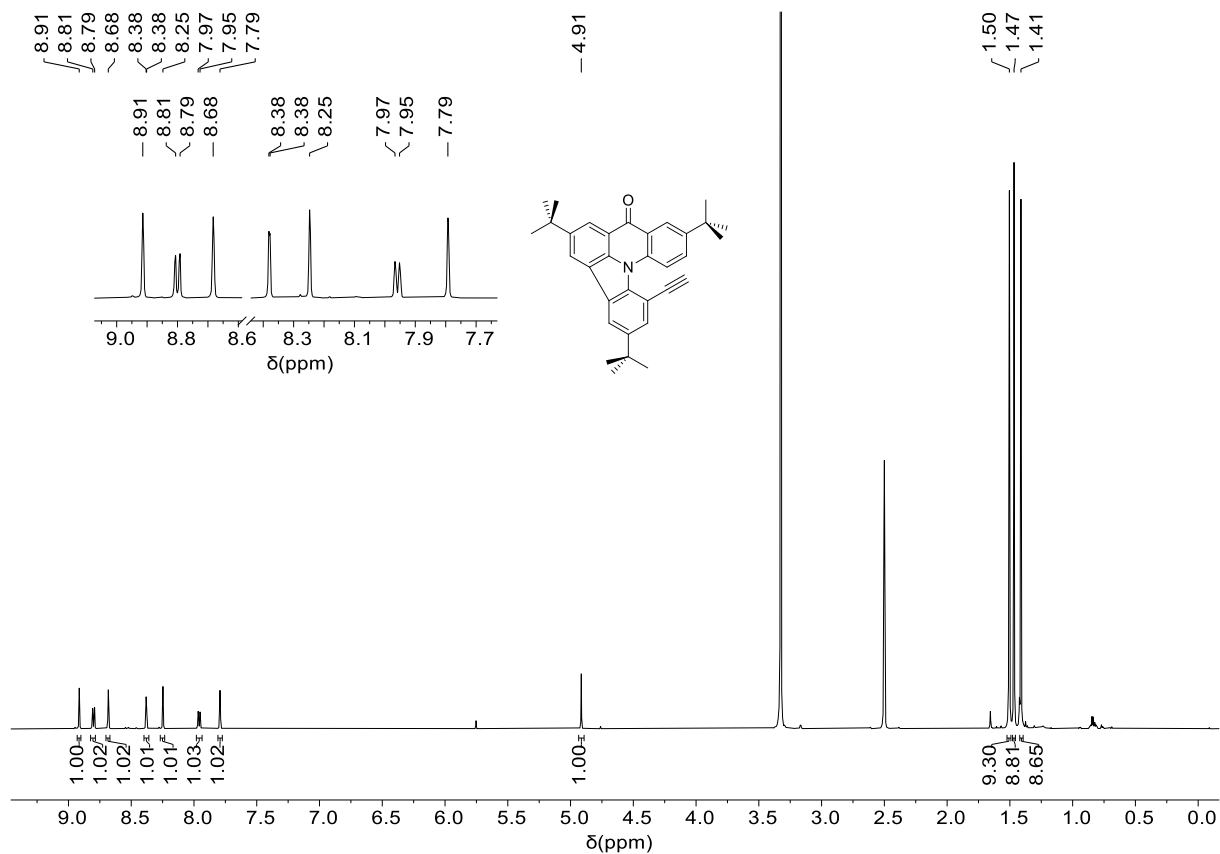

**Figure S13.**  $^1\text{H}$  NMR spectrum (600 MHz,  $\text{DMSO-}d_6$ ) of compound **10**.

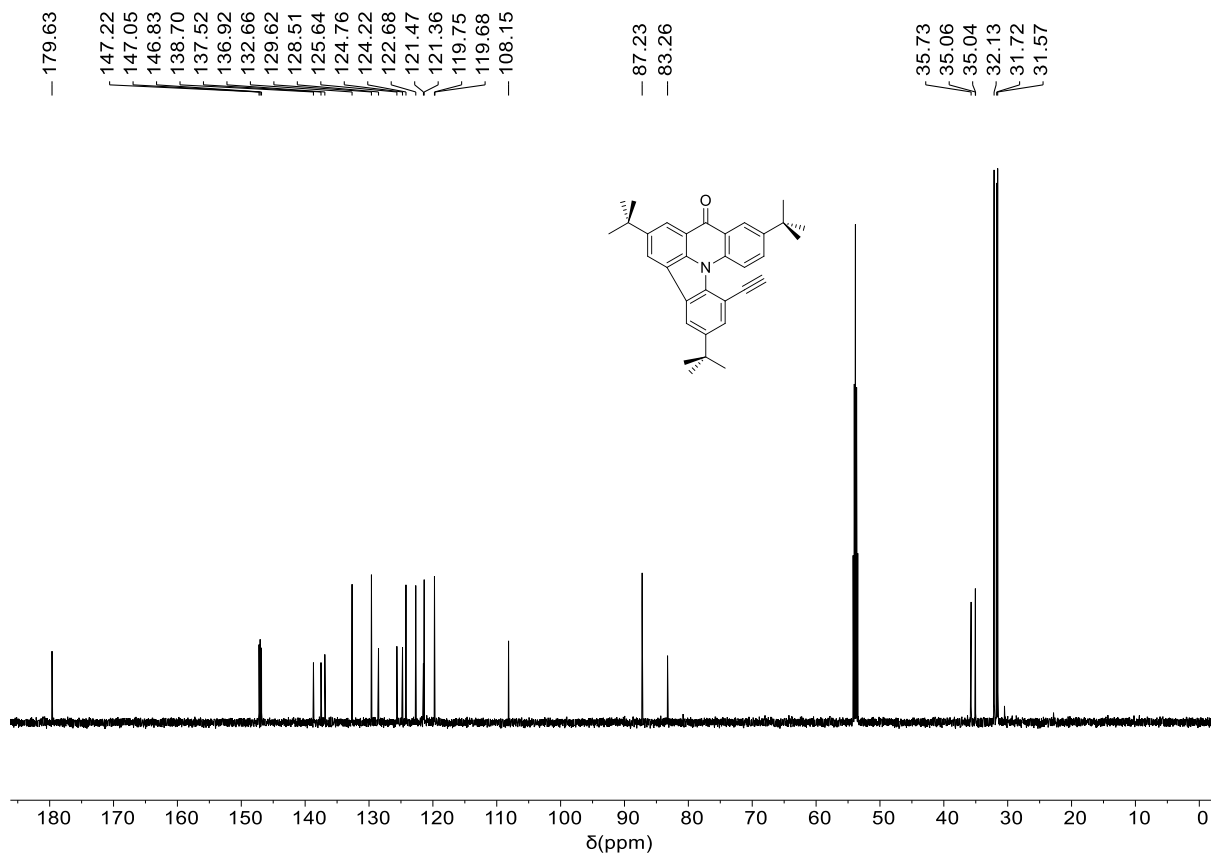

**Figure S14.**  $^{13}\text{C}$  NMR spectrum (150 MHz,  $\text{CD}_2\text{Cl}_2$ ) of compound **10**.

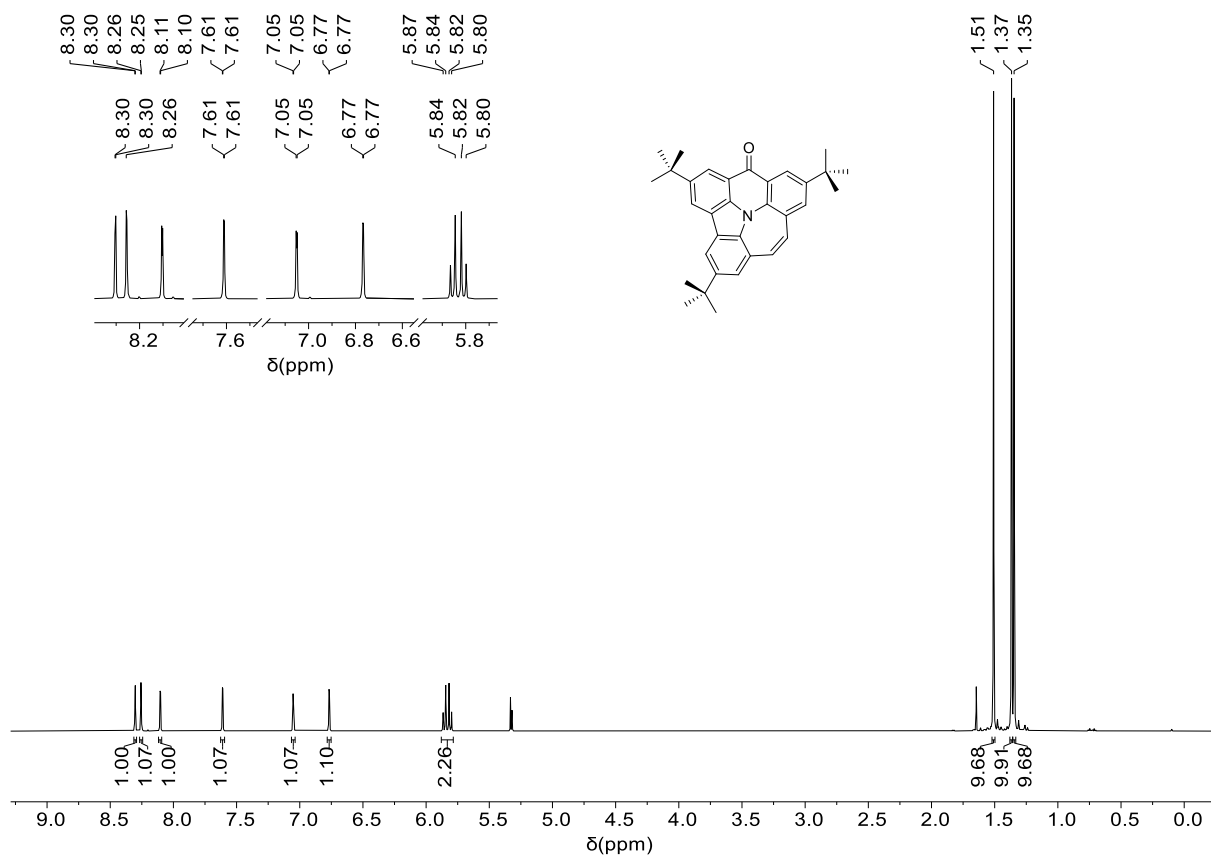

**Figure S15.** <sup>1</sup>H NMR spectrum (600 MHz, CD<sub>2</sub>Cl<sub>2</sub>) of compound **11**.

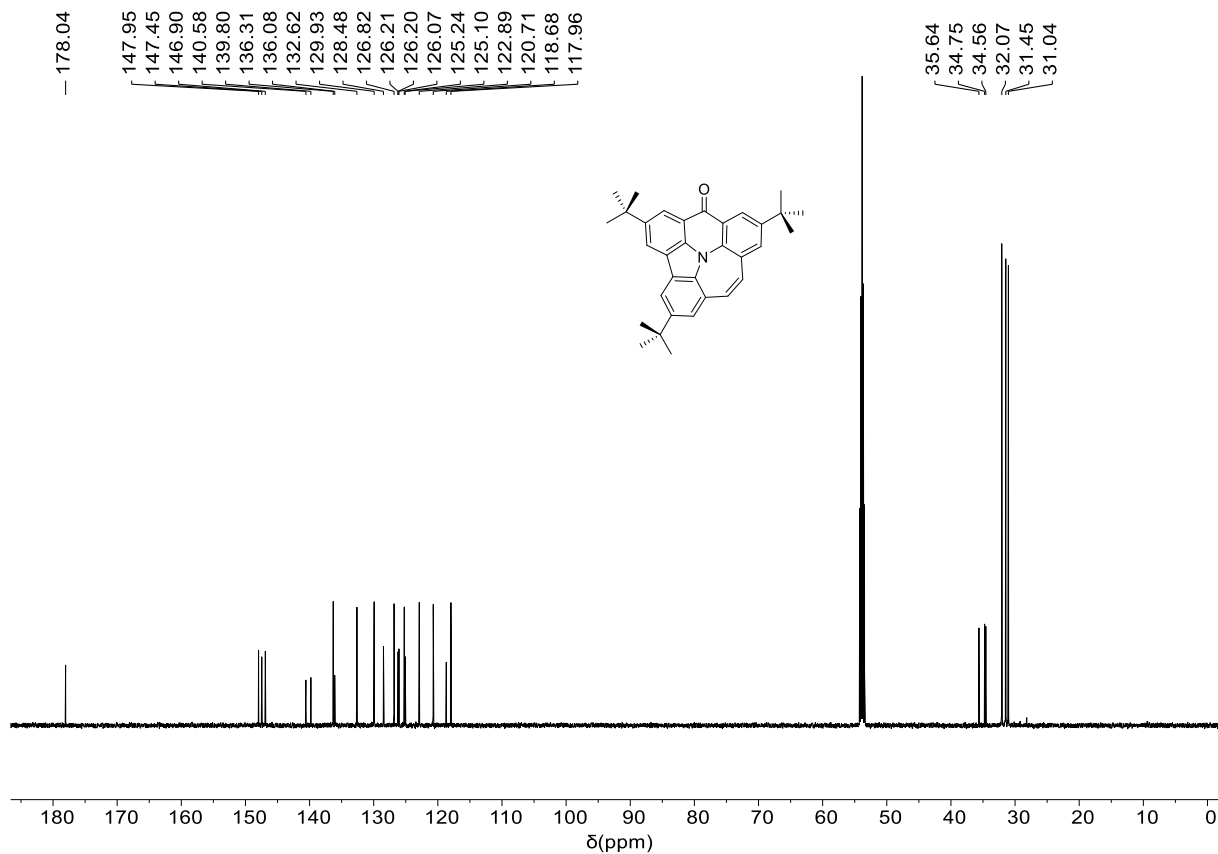

**Figure S16.** <sup>13</sup>C NMR spectrum (150 MHz, CD<sub>2</sub>Cl<sub>2</sub>) of compound **11**.

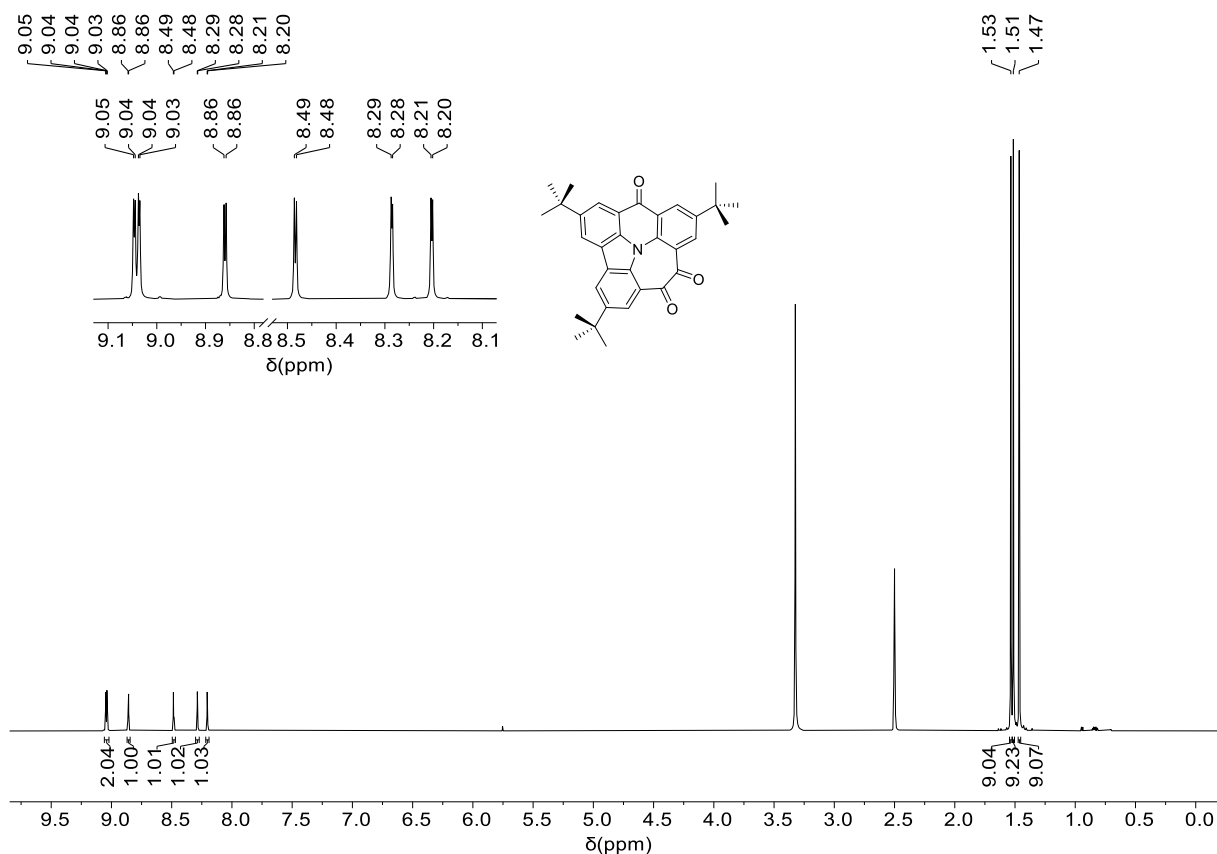

**Figure S17.**  $^1\text{H}$  NMR spectrum (600 MHz,  $\text{DMSO-}d_6$ ) of compound **12**.

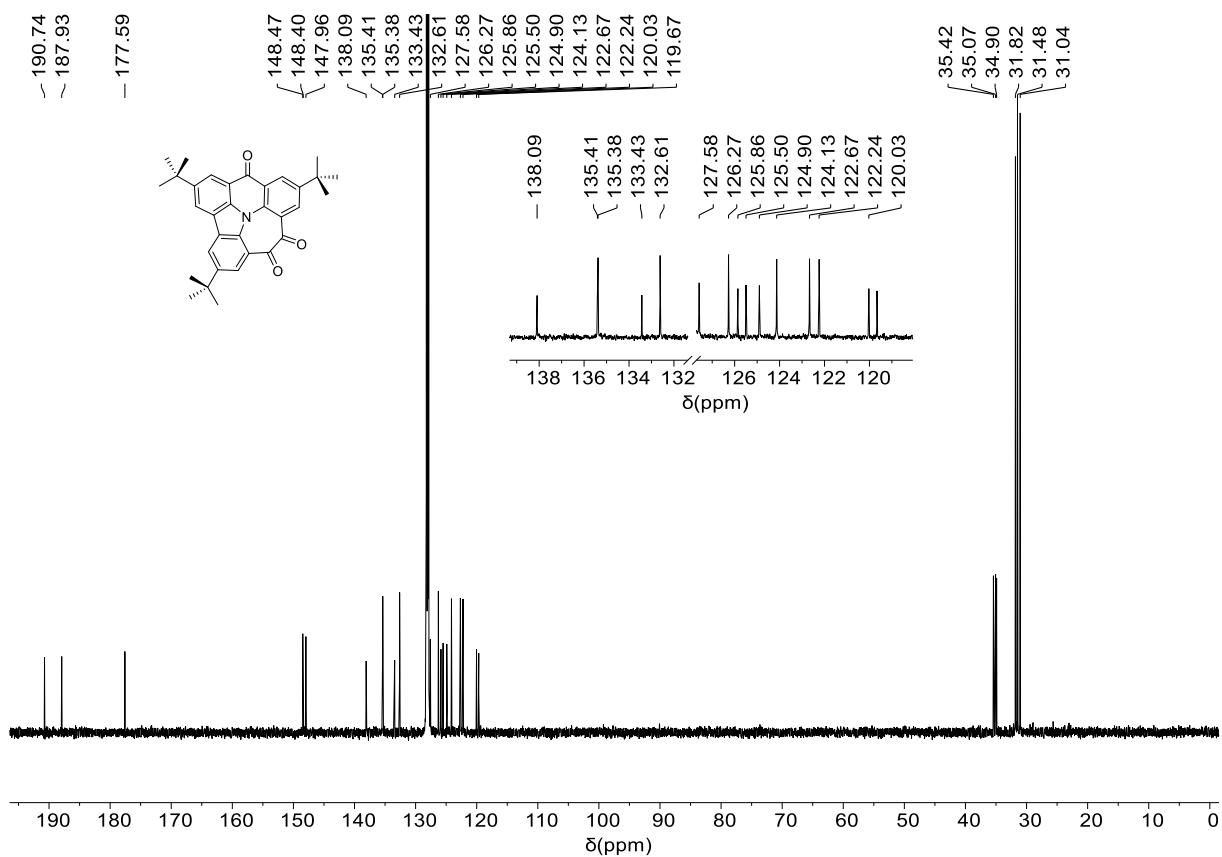

**Figure S18.**  $^{13}\text{C}$  NMR spectrum (150 MHz,  $\text{C}_6\text{D}_6$ ) of compound **12**.

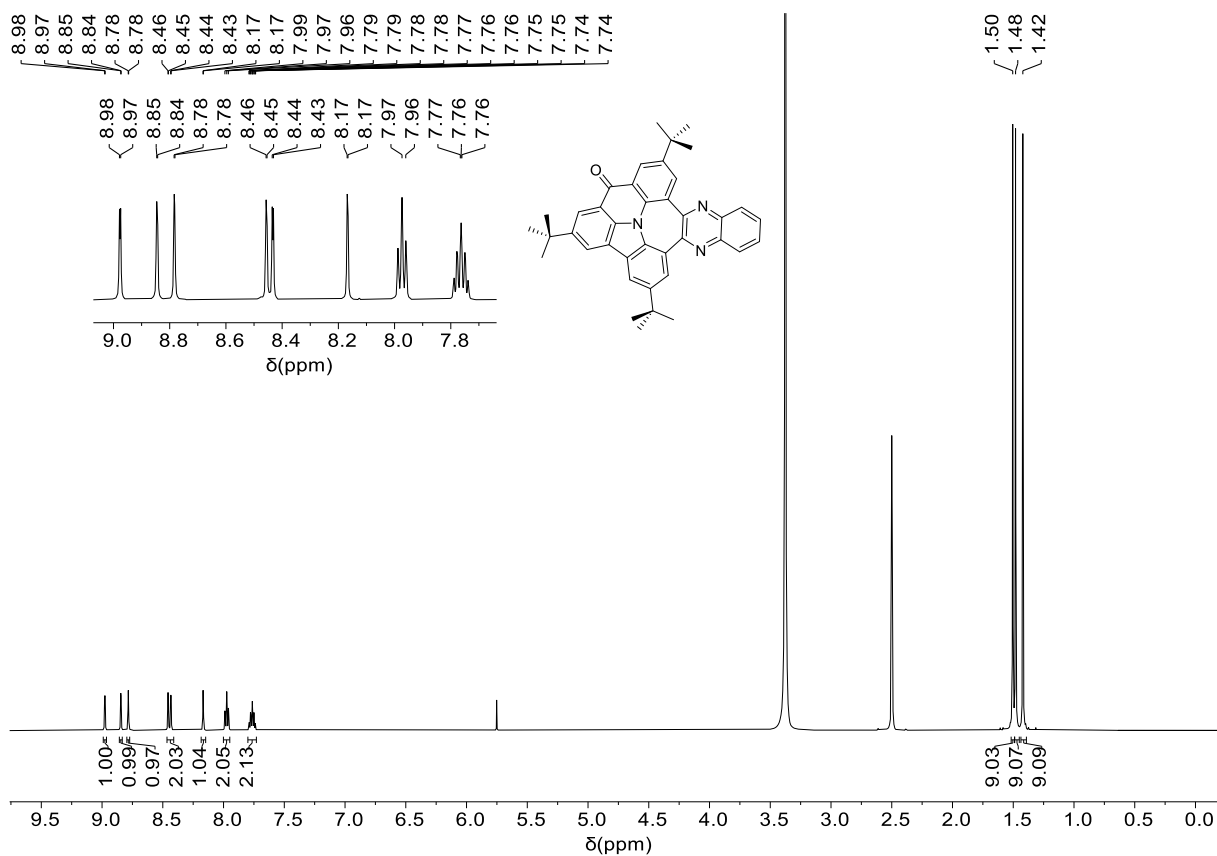

**Figure S19.**  $^1\text{H}$  NMR spectrum (600 MHz,  $\text{DMSO-}d_6$ ) of compound **13**.

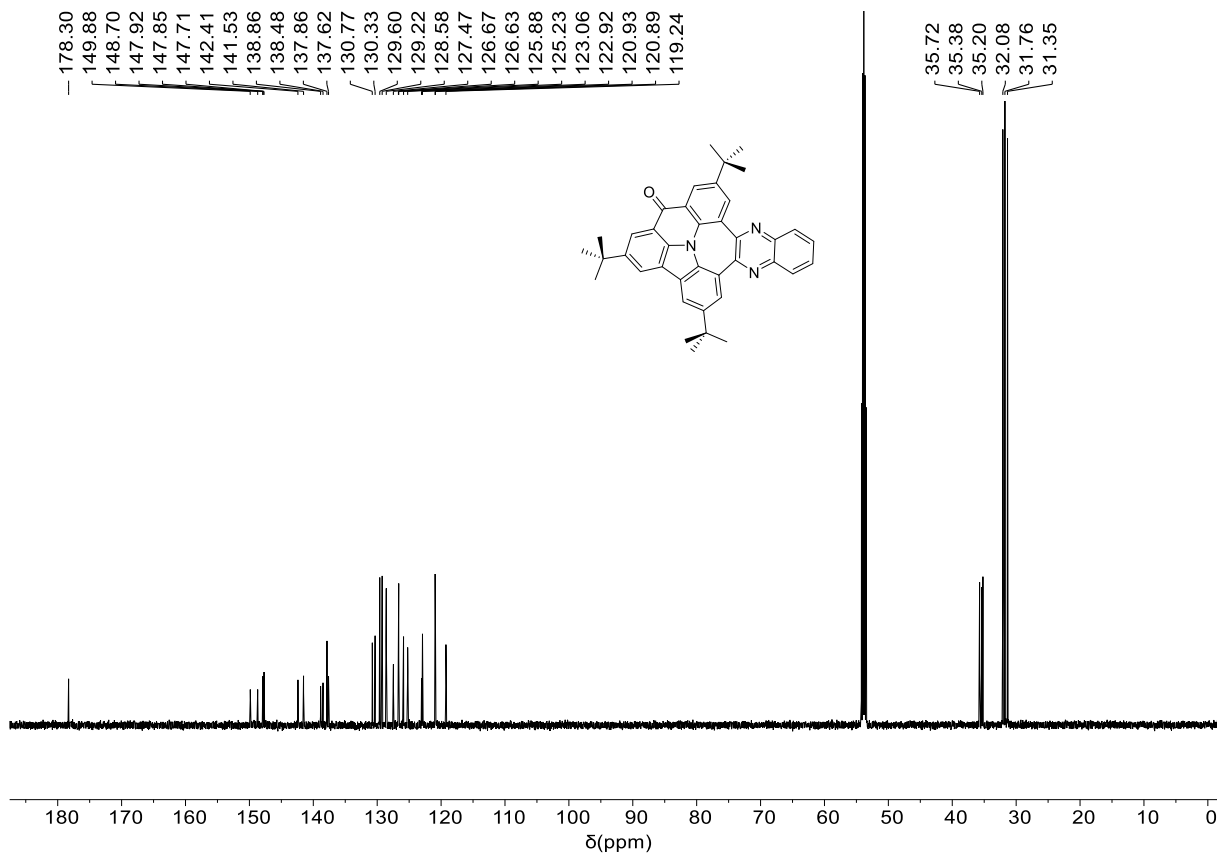

**Figure S20.**  $^{13}\text{C}$  NMR spectrum (150 MHz,  $\text{CD}_2\text{Cl}_2$ ) of compound **13**.



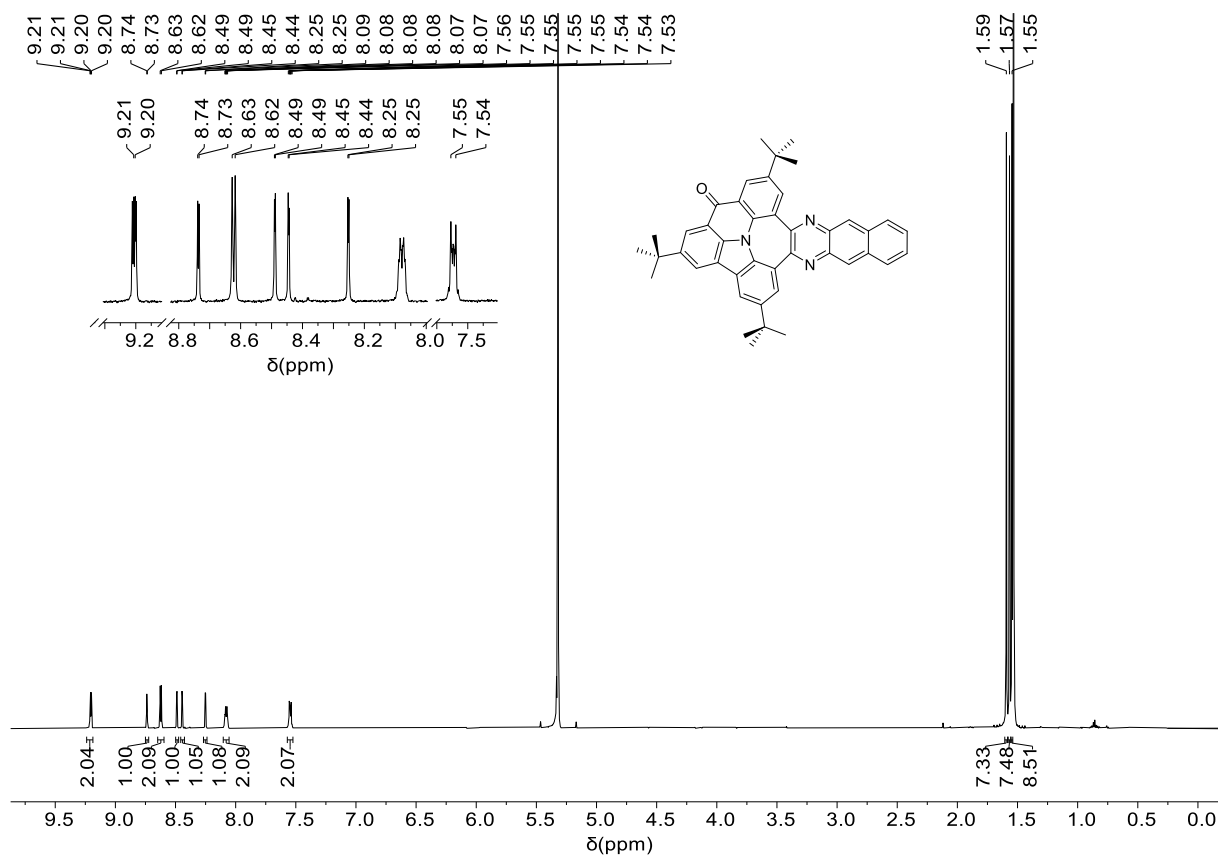

**Figure S21. <sup>1</sup>H NMR spectrum (600 MHz, CD<sub>2</sub>Cl<sub>2</sub>) of compound 14.**

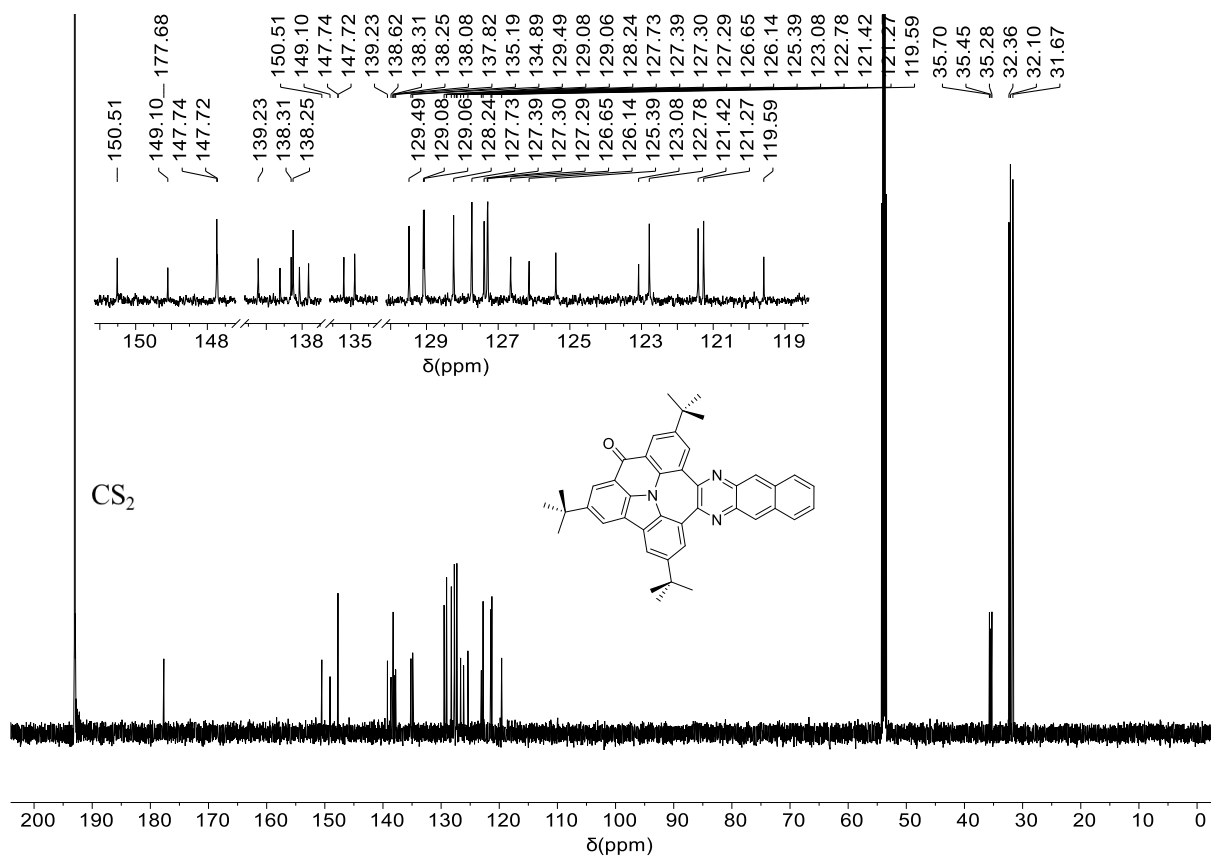

**Figure S22. <sup>13</sup>C NMR spectrum (150 MHz, CD<sub>2</sub>Cl<sub>2</sub>+CS<sub>2</sub>) of compound 14.**

## 4. X-ray crystallographic structure determination

**Table S1.** Crystal data and structure refinement for compound **12**.

|                                             |                                                               |
|---------------------------------------------|---------------------------------------------------------------|
| Empirical formula                           | C <sub>33</sub> H <sub>33</sub> NO <sub>3</sub>               |
| Formula weight                              | 491.60                                                        |
| Temperature/K                               | 156(50)                                                       |
| Crystal system                              | triclinic                                                     |
| Space group                                 | P-1                                                           |
| a/Å                                         | 8.5381(13)                                                    |
| b/Å                                         | 11.5788(12)                                                   |
| c/Å                                         | 13.9638(13)                                                   |
| α/°                                         | 104.306(9)                                                    |
| β/°                                         | 101.301(11)                                                   |
| γ/°                                         | 96.055(10)                                                    |
| Volume/Å <sup>3</sup>                       | 1294.4(3)                                                     |
| Z                                           | 2                                                             |
| ρ <sub>calc</sub> /cm <sup>3</sup>          | 1.261                                                         |
| μ/mm <sup>-1</sup>                          | 0.629                                                         |
| F(000)                                      | 524.0                                                         |
| Crystal size/mm <sup>3</sup>                | 0.15 × 0.1 × 0.08                                             |
| Radiation                                   | Cu Kα (λ = 1.54184)                                           |
| 2θ range for data collection/°              | 6.714 to 133.196                                              |
| Index ranges                                | -9 ≤ h ≤ 10, -13 ≤ k ≤ 12, -16 ≤ l ≤ 15                       |
| Reflections collected                       | 11854                                                         |
| Independent reflections                     | 4527 [R <sub>int</sub> = 0.1236, R <sub>sigma</sub> = 0.2148] |
| Data/restraints/parameters                  | 4527/39/374                                                   |
| Goodness-of-fit on F <sup>2</sup>           | 0.937                                                         |
| Final R indexes [I ≥ 2σ (I)]                | R <sub>1</sub> = 0.0863, wR <sub>2</sub> = 0.1918             |
| Final R indexes [all data]                  | R <sub>1</sub> = 0.1681, wR <sub>2</sub> = 0.2444             |
| Largest diff. peak/hole / e Å <sup>-3</sup> | 0.28/-0.28                                                    |

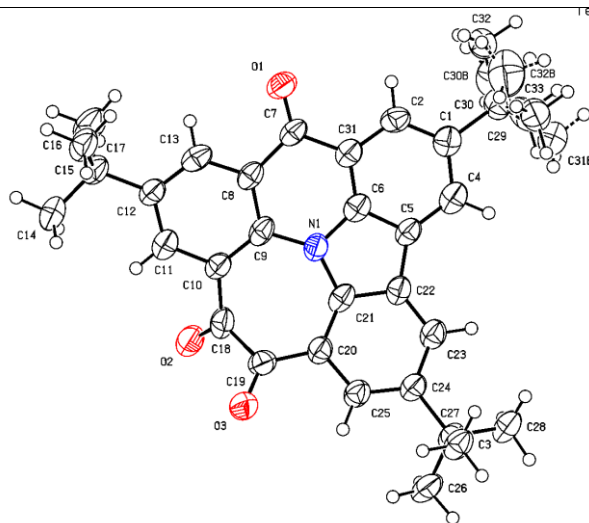

**Figure S23.** Crystal structure of **12** with an ellipsoid contour at the 50% probability level.

**Table S2.** Crystal data and structure refinement for compound **13**.

|                                             |                                                                |
|---------------------------------------------|----------------------------------------------------------------|
| Empirical formula                           | C <sub>39</sub> H <sub>37</sub> N <sub>3</sub> O               |
| Formula weight                              | 563.71                                                         |
| Temperature/K                               | 101(2)                                                         |
| Crystal system                              | monoclinic                                                     |
| Space group                                 | I2/a                                                           |
| a/Å                                         | 16.4721(5)                                                     |
| b/Å                                         | 27.0374(10)                                                    |
| c/Å                                         | 43.8324(19)                                                    |
| α/°                                         | 90                                                             |
| β/°                                         | 90.02(2)                                                       |
| γ/°                                         | 90                                                             |
| Volume/Å <sup>3</sup>                       | 19521.3(13)                                                    |
| Z                                           | 16                                                             |
| ρ <sub>calc</sub> /cm <sup>3</sup>          | 0.767                                                          |
| μ/mm <sup>-1</sup>                          | 0.357                                                          |
| F(000)                                      | 4800.0                                                         |
| Crystal size/mm <sup>3</sup>                | 0.15 × 0.13 × 0.1                                              |
| Radiation                                   | Cu Kα (λ = 1.54184)                                            |
| 2θ range for data collection/°              | 6.876 to 133.18                                                |
| Index ranges                                | -18 ≤ h ≤ 19, -31 ≤ k ≤ 32, -52 ≤ l ≤ 45                       |
| Reflections collected                       | 60687                                                          |
| Independent reflections                     | 17067 [R <sub>int</sub> = 0.0656, R <sub>sigma</sub> = 0.0607] |
| Data/restraints/parameters                  | 17067/46/818                                                   |
| Goodness-of-fit on F <sup>2</sup>           | 1.525                                                          |
| Final R indexes [I >= 2σ (I)]               | R <sub>1</sub> = 0.1336, wR <sub>2</sub> = 0.3892              |
| Final R indexes [all data]                  | R <sub>1</sub> = 0.1659, wR <sub>2</sub> = 0.4164              |
| Largest diff. peak/hole / e Å <sup>-3</sup> | 0.55/-0.61                                                     |

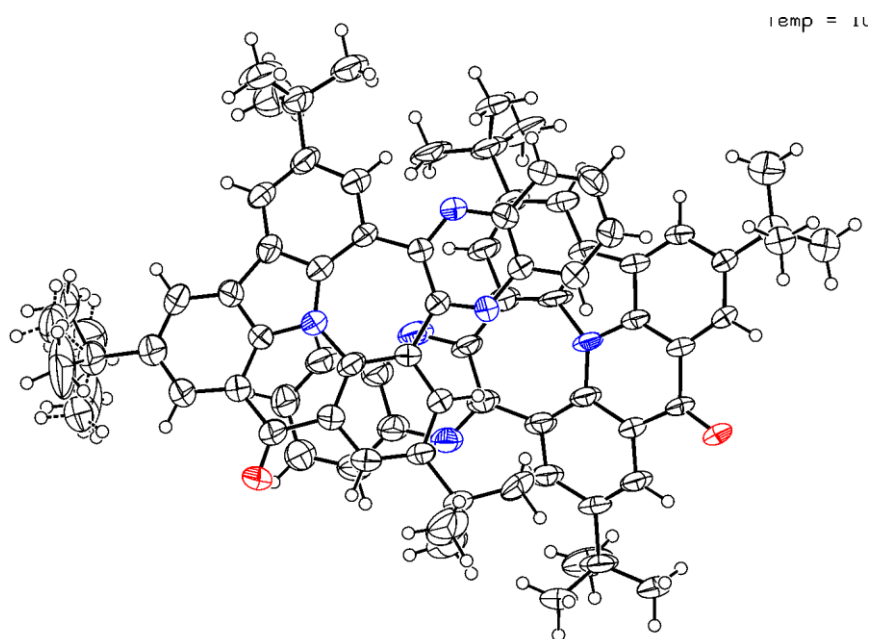**Figure S24.** Crystal structure of **13** with an ellipsoid contour at the 50% probability level.

## 5. Delayed photoluminescence curves

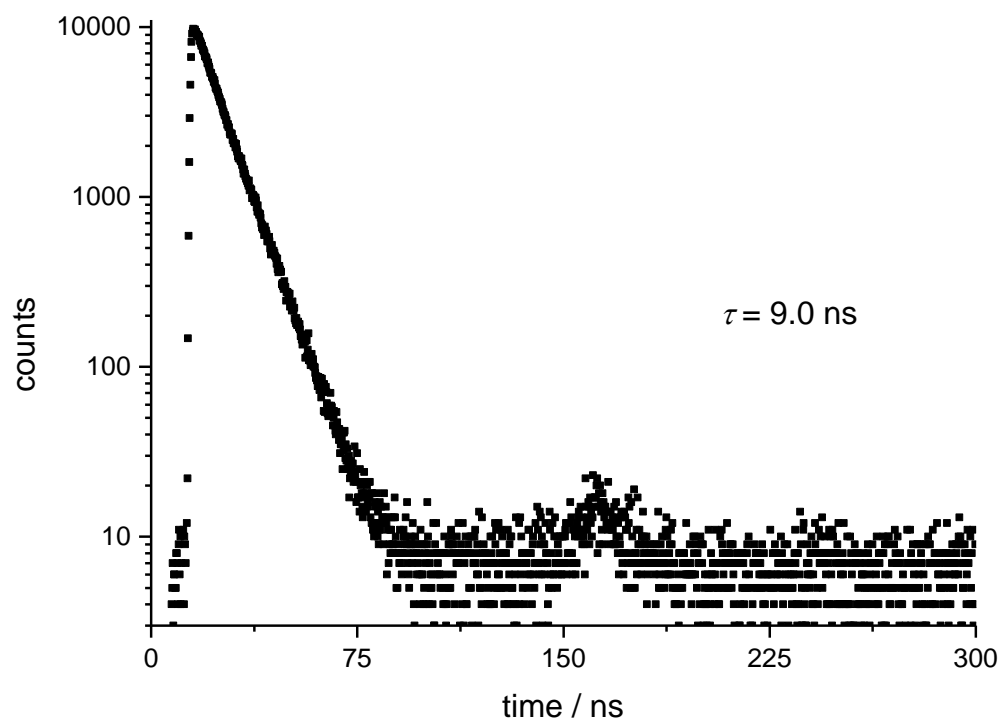

**Figure S25.** Fluorescence decay curve of **5** in dichloromethane at room temperature.

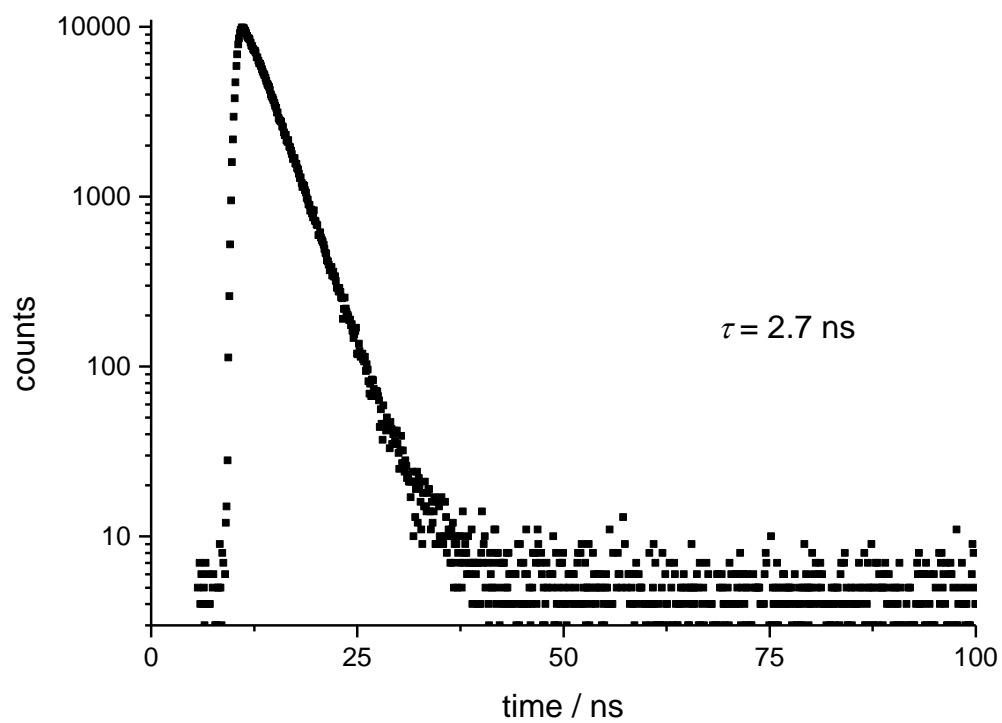

**Figure S26.** Fluorescence decay curve of **7** in dichloromethane at room temperature.

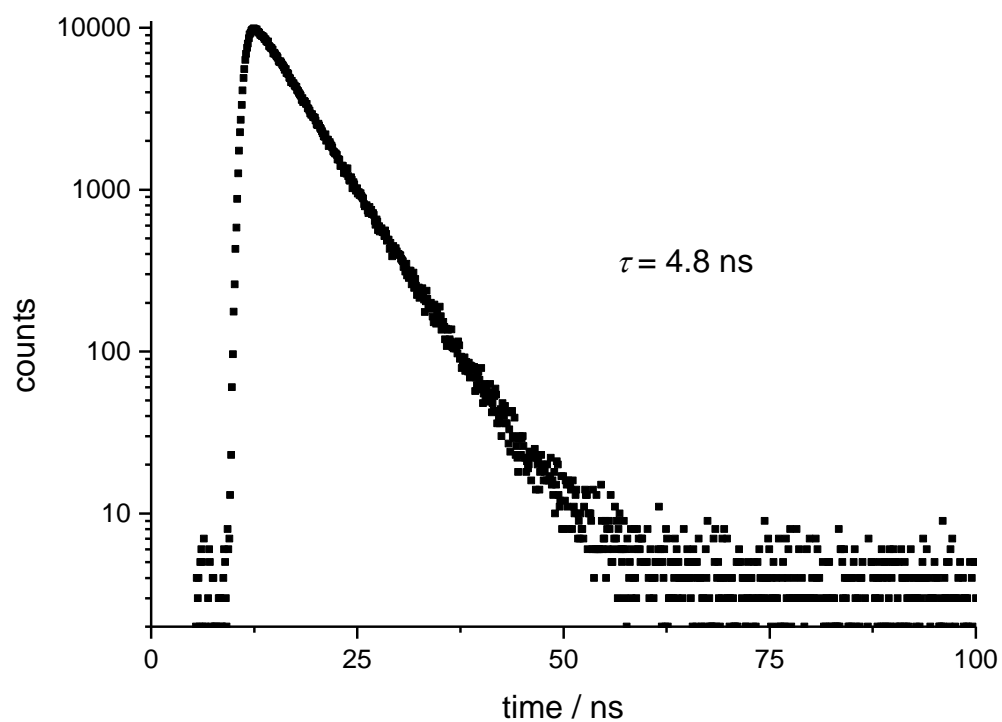

**Figure S27.** Fluorescence decay curve of **11** in dichloromethane at room temperature.

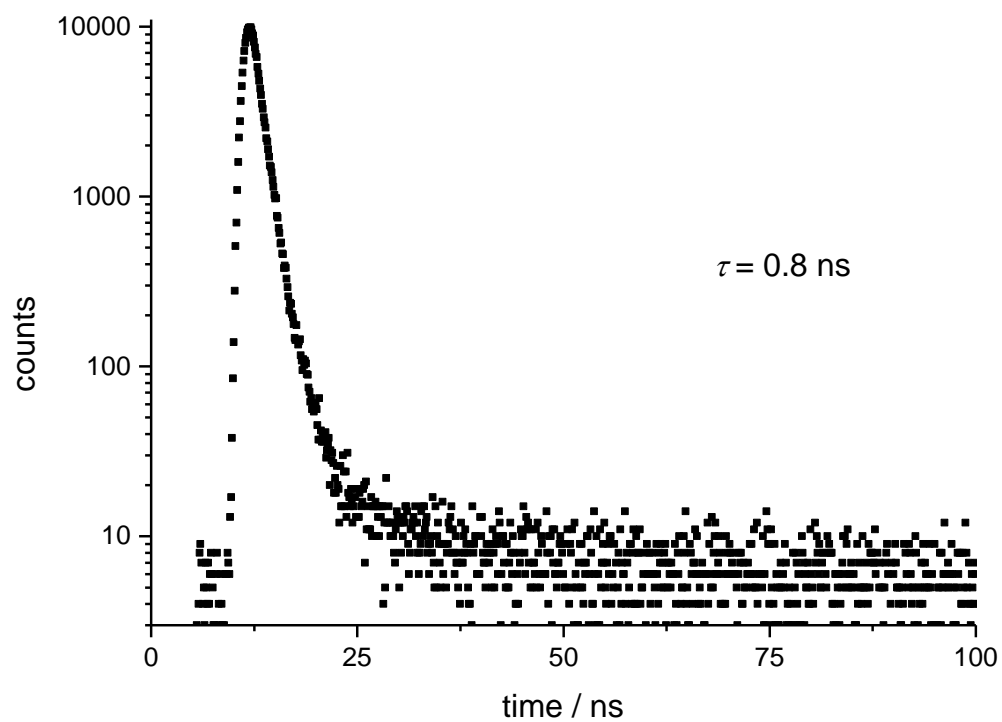

**Figure S28.** Fluorescence decay curve of **12** in dichloromethane at room temperature.

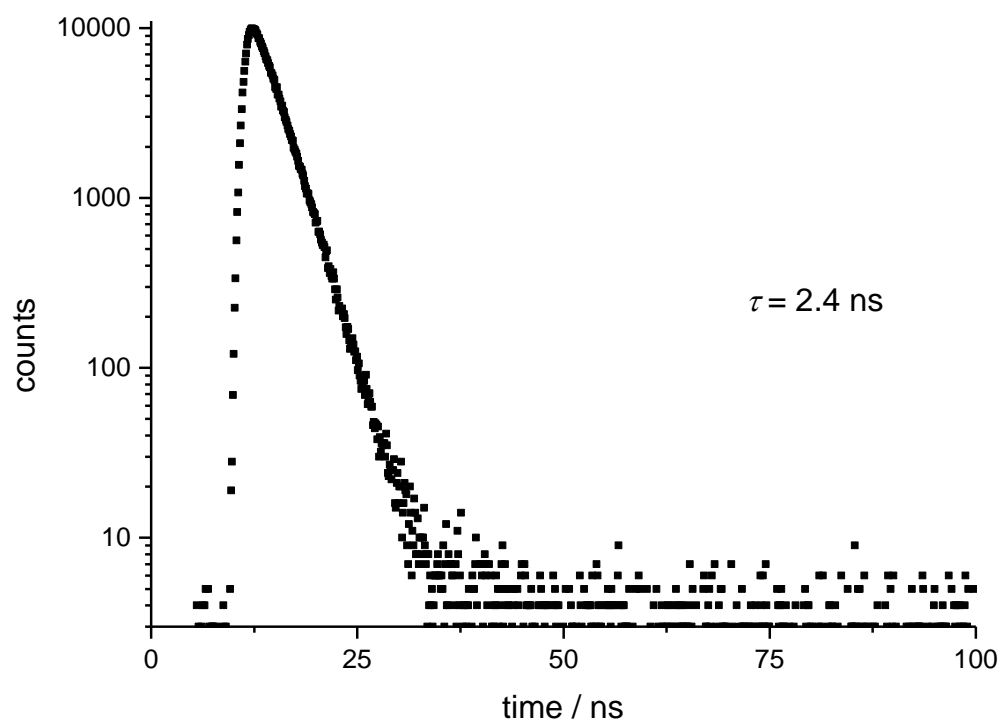

**Figure S29.** Fluorescence decay curve of **13** in dichloromethane at room temperature.

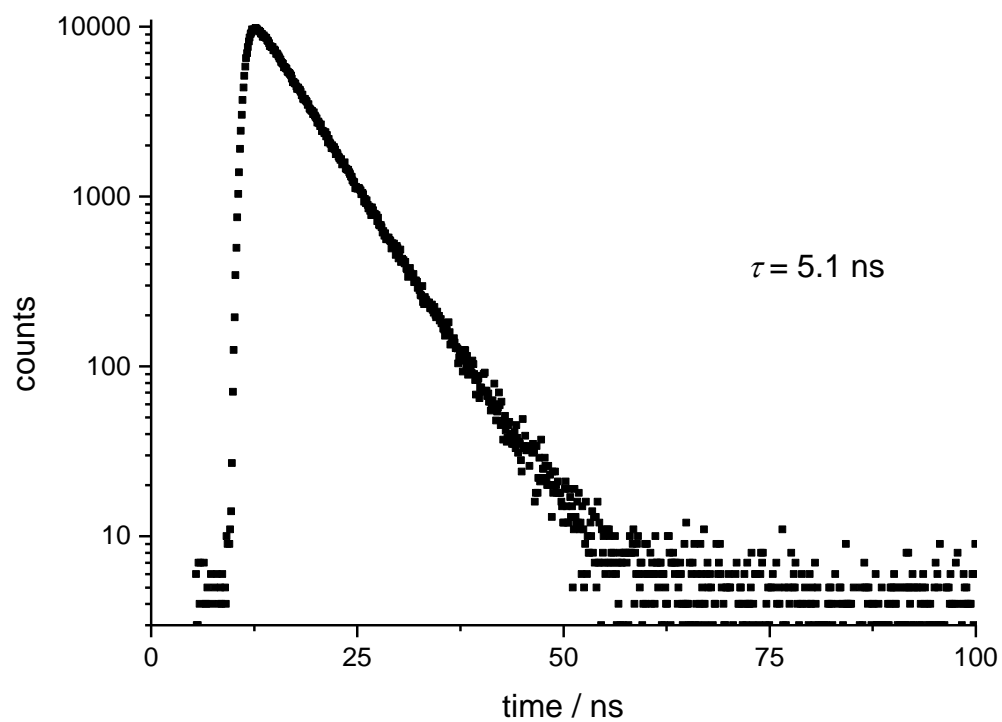

**Figure S30.** Fluorescence decay curve of **14** in dichloromethane at room temperature.

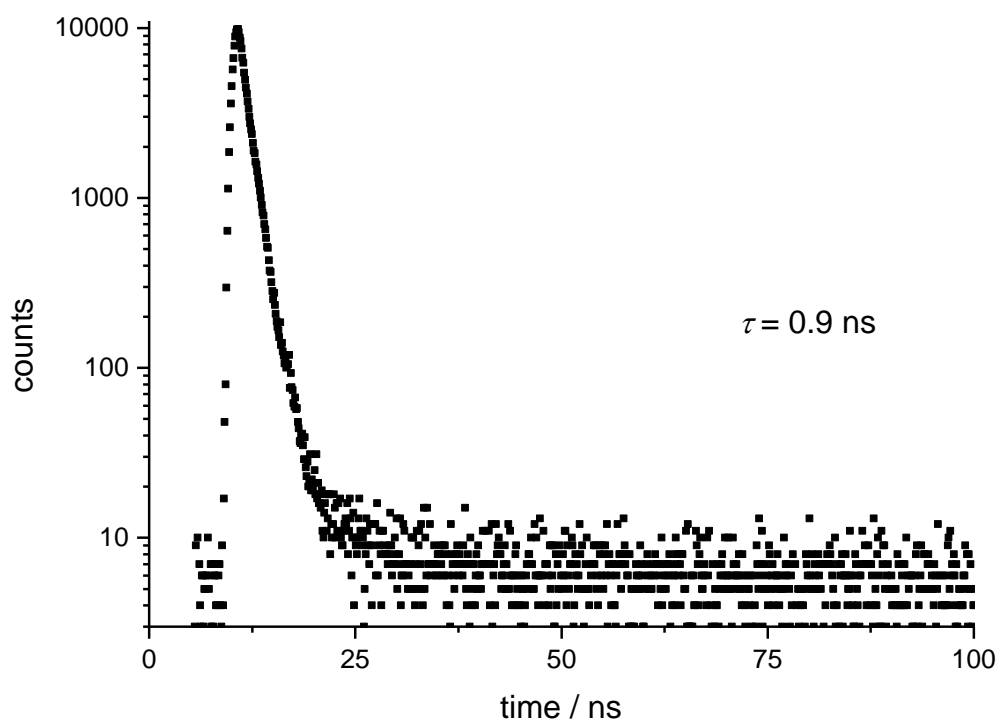

**Figure S31.** Fluorescence decay curve of *tert*-butylated **1** in dichloromethane at room temperature.

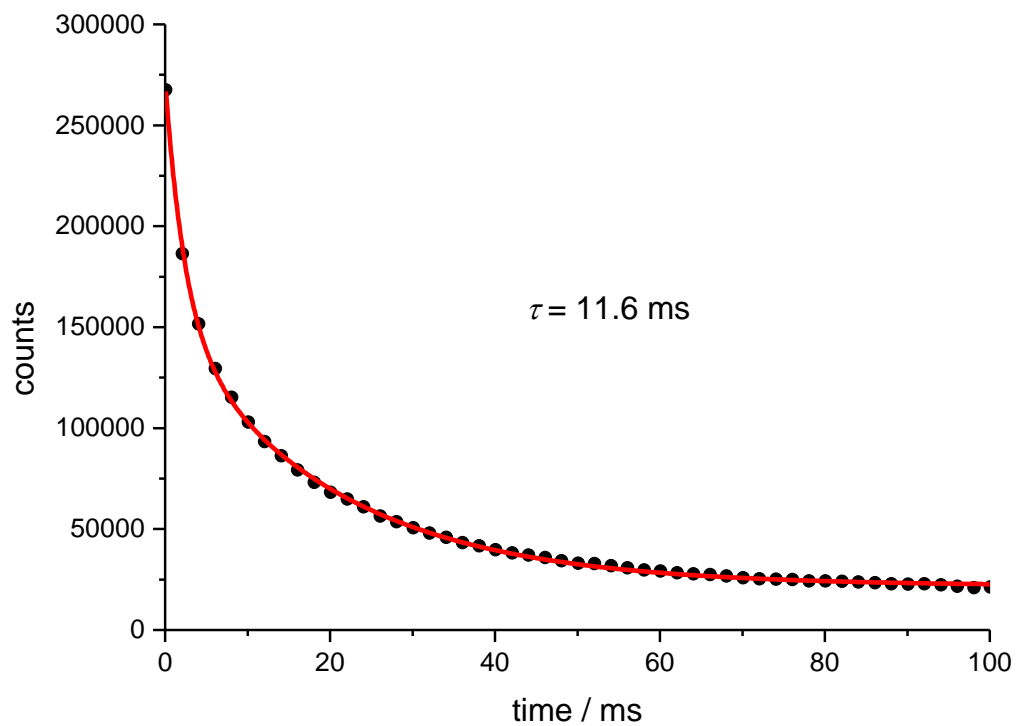

**Figure S32.** Phosphorescence decay curve of **12** in crystalline state at room temperature, 0.1 ms delayed.

## 6. Electrochemical property

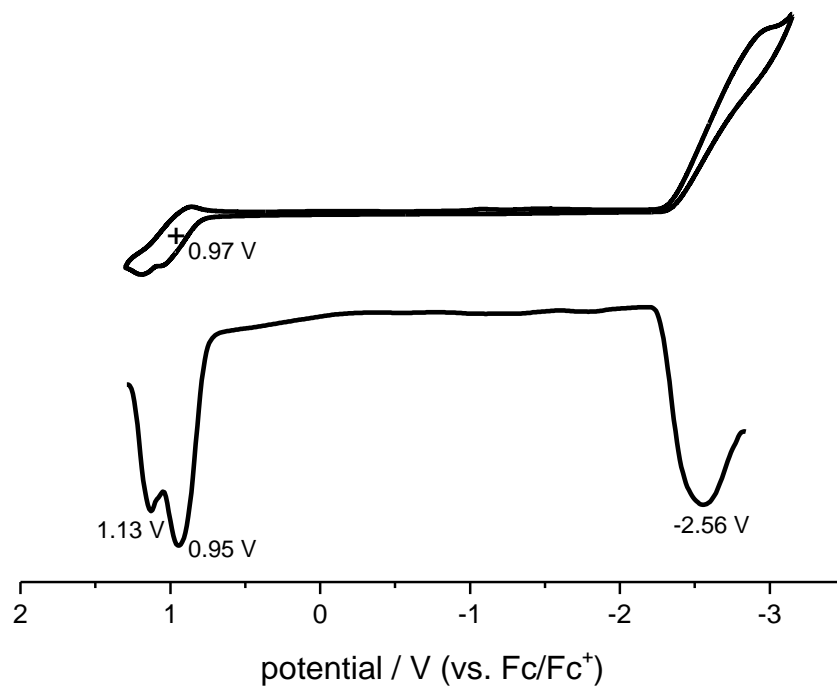

**Figure S33.** CV and DPV curves of **5** measured in dichloromethane using  $n\text{Bu}_4\text{NPF}_6$  (0.1 M) as the supporting electrolyte and ferrocene as internal standard.

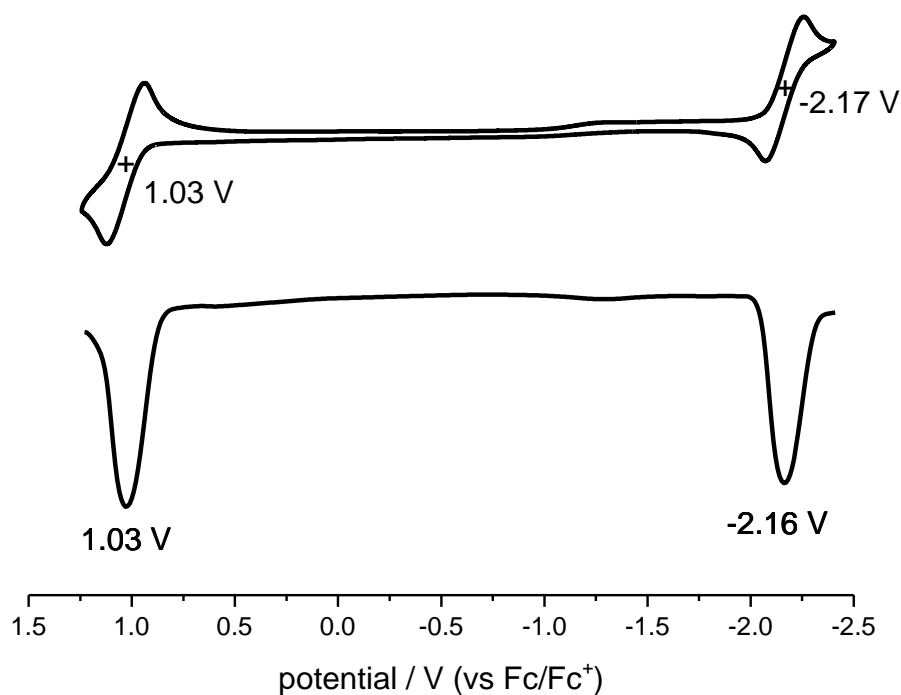

**Figure S34.** CV and DPV curves of **7** measured in dichloromethane using  $n\text{Bu}_4\text{NPF}_6$  (0.1 M) as the supporting electrolyte and ferrocene as internal standard.



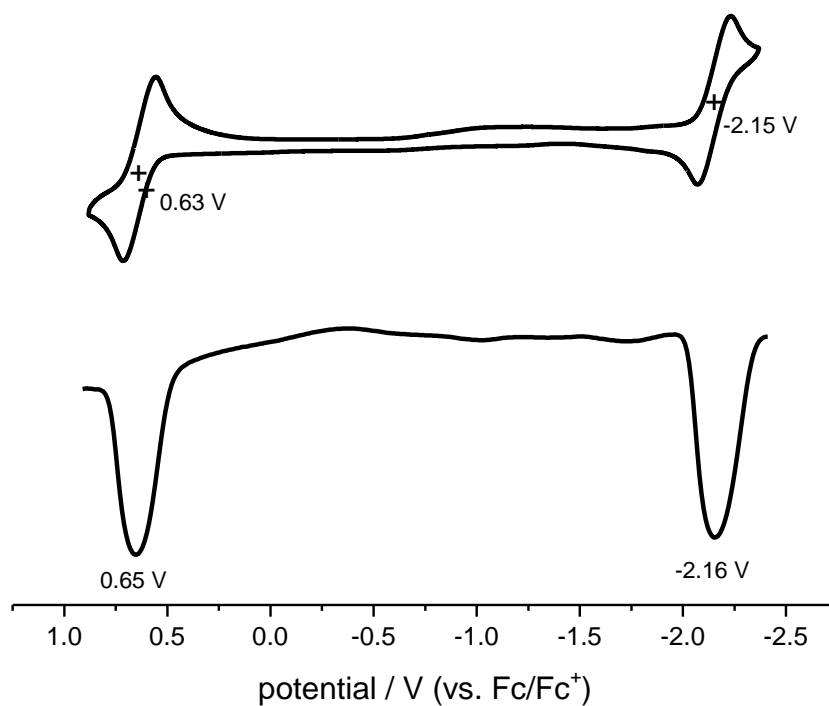

**Figure S35.** CV and DPV curves of **11** measured in dichloromethane using  $n\text{Bu}_4\text{NPF}_6$  (0.1 M) as the supporting electrolyte and ferrocene as internal standard.

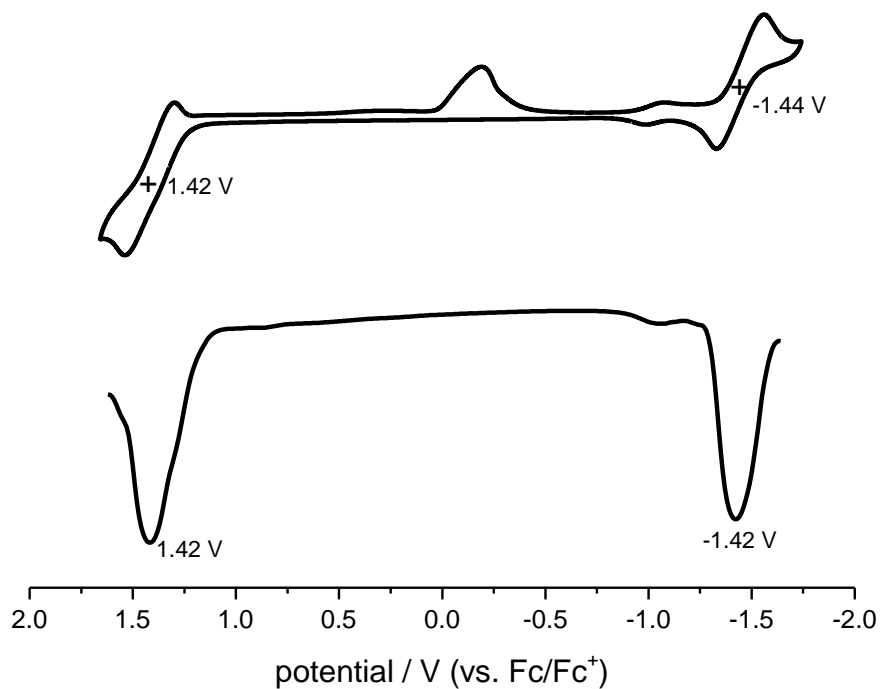

**Figure S36.** CV and DPV curves of **12** measured in dichloromethane using  $n\text{Bu}_4\text{NPF}_6$  (0.1 M) as the supporting electrolyte and ferrocene as internal standard.

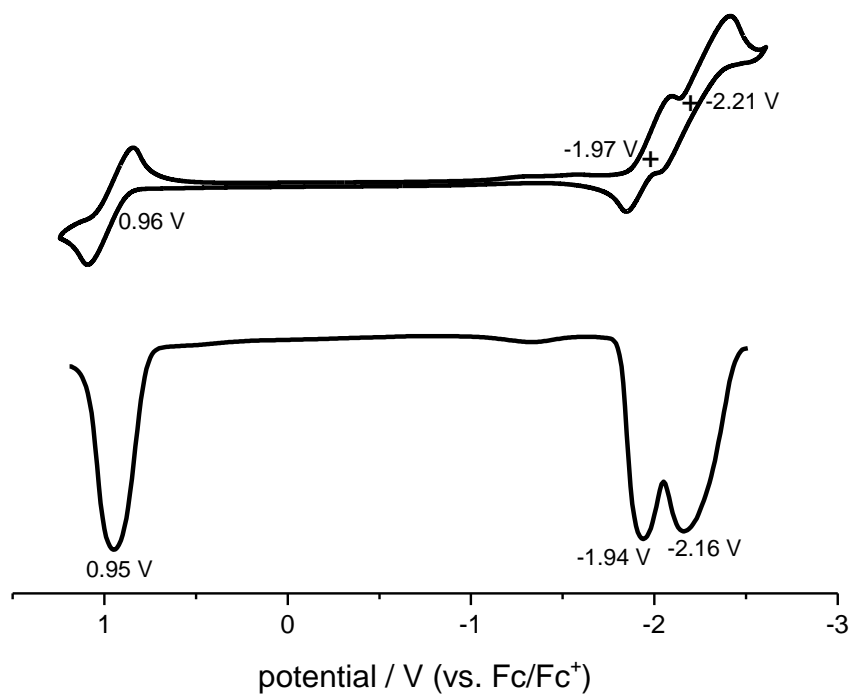

**Figure S37.** CV and DPV curves of **13** measured in dichloromethane using  $n\text{Bu}_4\text{NPF}_6$  (0.1 M) as the supporting electrolyte and ferrocene as internal standard.

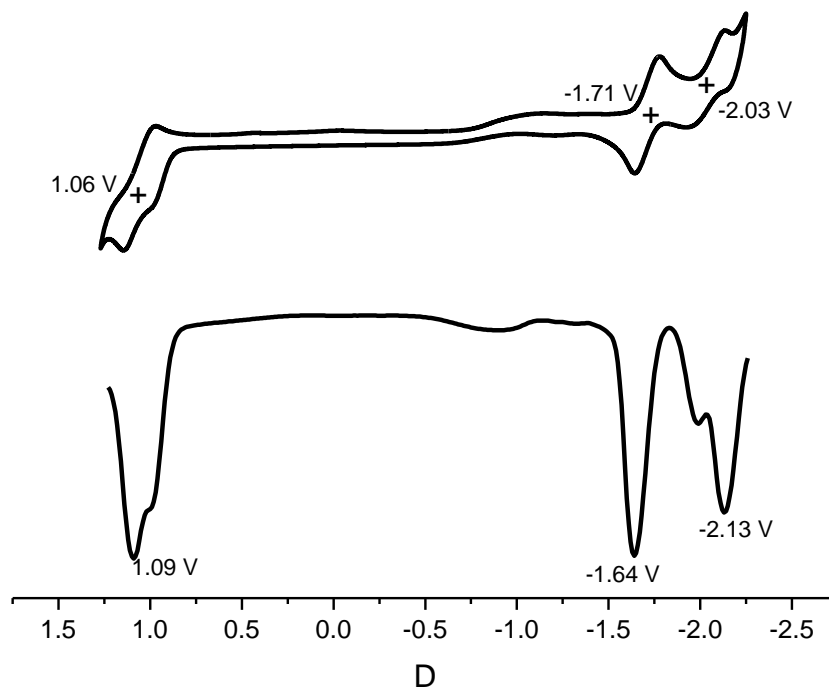

**Figure S38.** CV and DPV curves of **14** measured in dichloromethane using  $n\text{Bu}_4\text{NPF}_6$  (0.1 M) as the supporting electrolyte and ferrocene as internal standard.

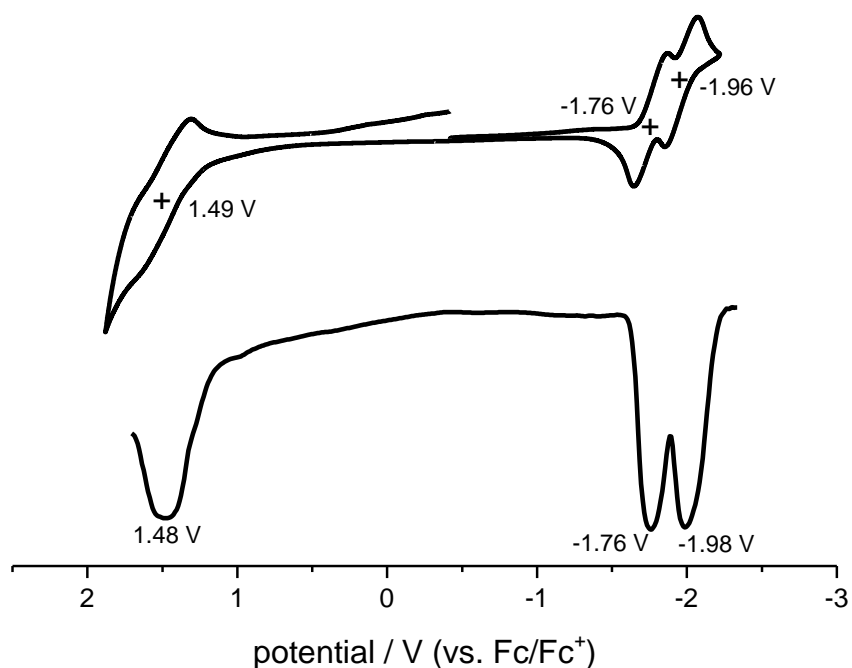

**Figure S39.** CV and DPV curves of *tert*-butylated **1** measured in dichloromethane using  $n\text{Bu}_4\text{NPF}_6$  (0.1 M) as the supporting electrolyte and ferrocene as internal standard.

## 7. EPR spectra

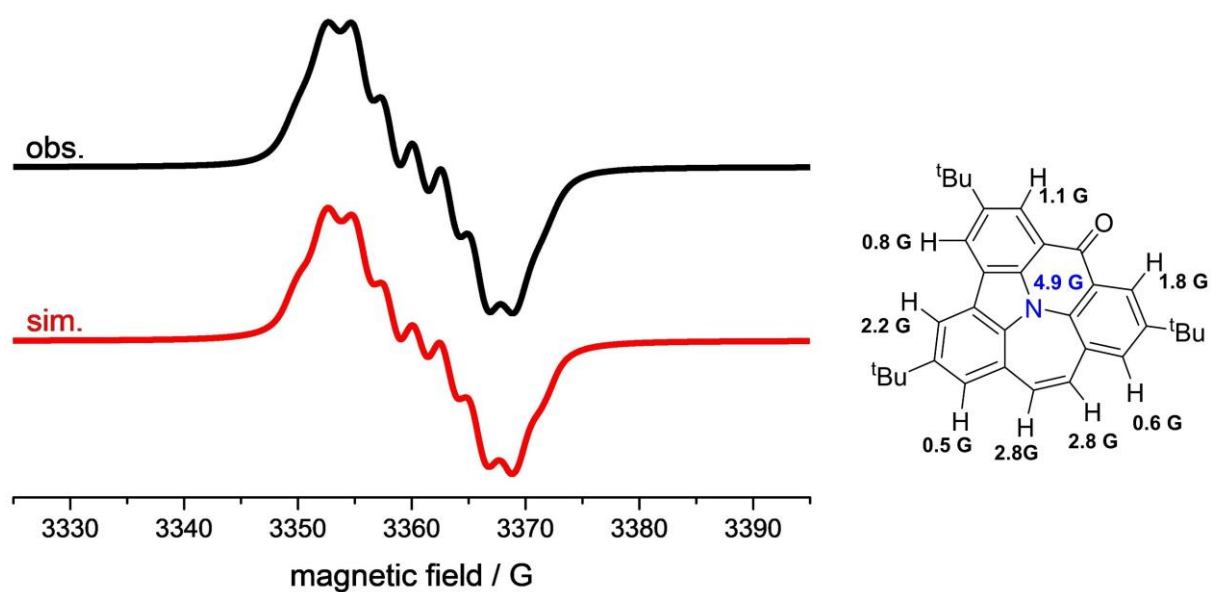

**Figure S40.** Experimental and simulated EPR spectra, and simulated hyperfine coupling constants of  $11^{+\cdot}$ .

## 8. The theoretical calculations

All the theoretical calculations were carried out using a *Gaussian 16* software.<sup>[S2]</sup> All the calculations were based on the optimized geometries at B3LYP/6-31G(d,p) level of theory. The frontier molecular orbitals are calculated at the B3LYP/6-311+G(d,p) level of theory. The calculation of excited state properties was performed using time-dependent DFT methods at B3LYP/6-311G+(d,p) level of theory in the solvent dichloromethane. The nucleus-independent chemical shift (NICS) calculation was done at GIAO-B3LYP/6-311G(d) level of theory. Bq atoms were inserted at the calculated positions and the Bq positions that are at the 1 Å away above the molecule were fixed with the assistant of Multiwfn software, as well as the generation of isotropic chemical shielding surfaces (ICSS), and related quantities.<sup>[S3]</sup>

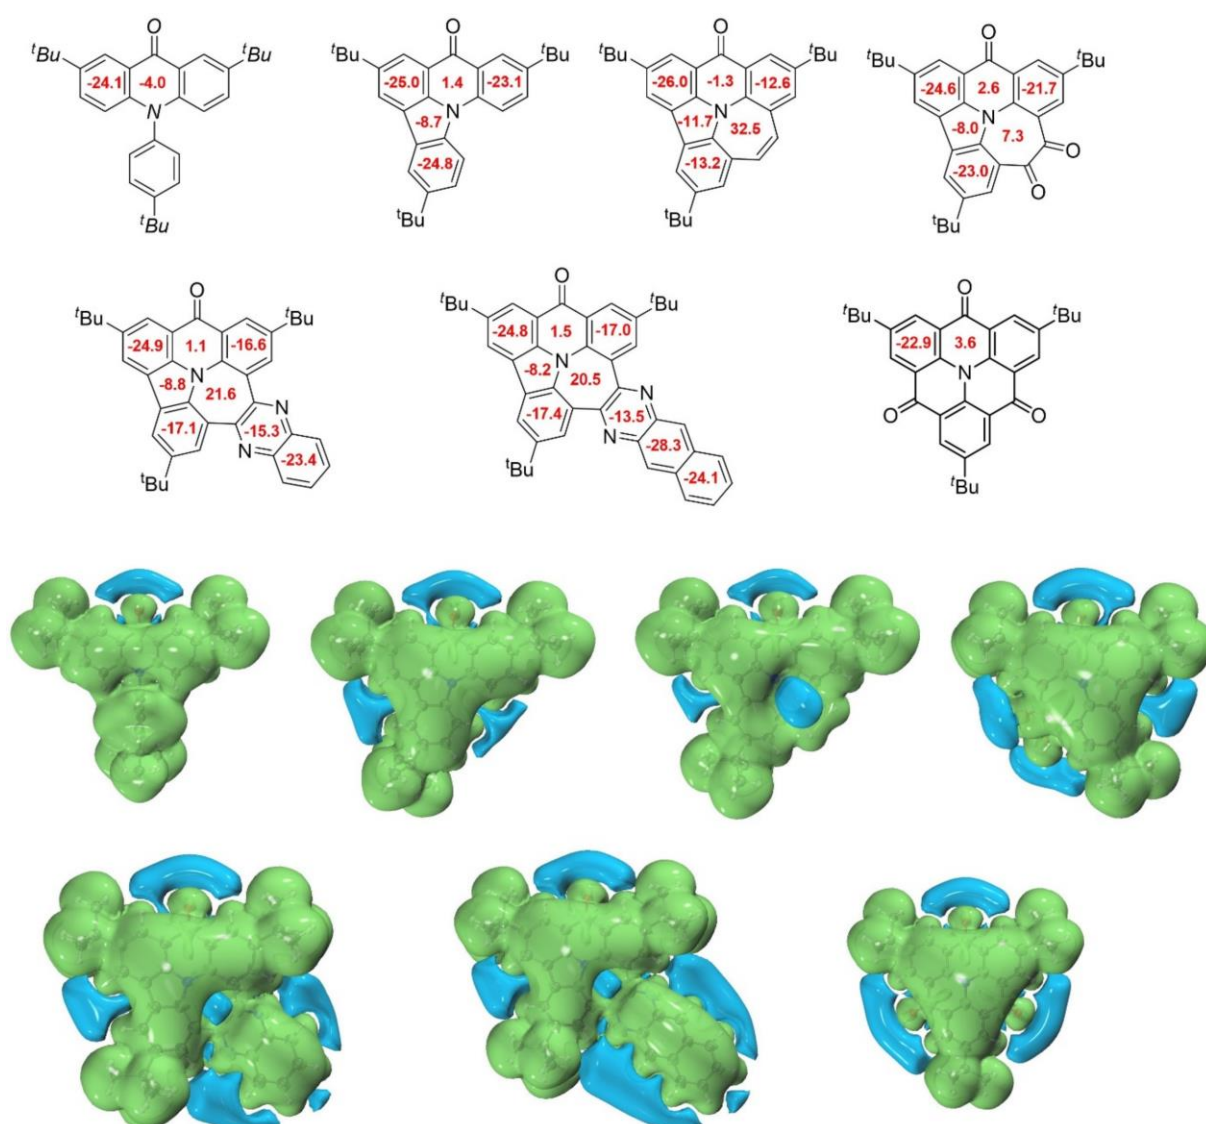

**Figure S41.** Calculated NICS(1)<sub>zz</sub> values and 3D ICSS maps of related compounds. The green and blue colors in 3D ICSS maps represent magnetically shielding and deshielding regions, respectively.

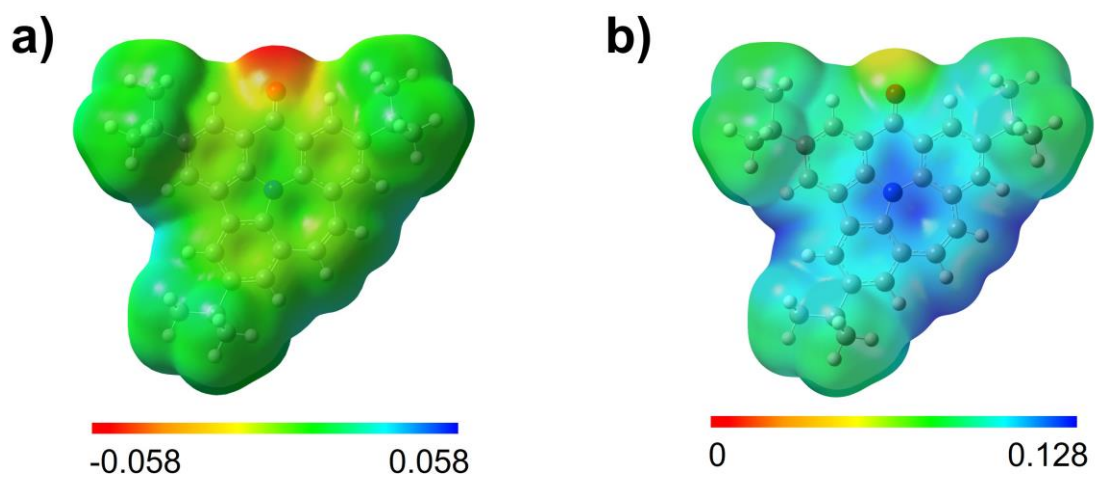

**Figure S42.** (a) Calculated electrostatic potential maps of (a) **11** (left) and (b) **11**<sup>2+</sup> (right).

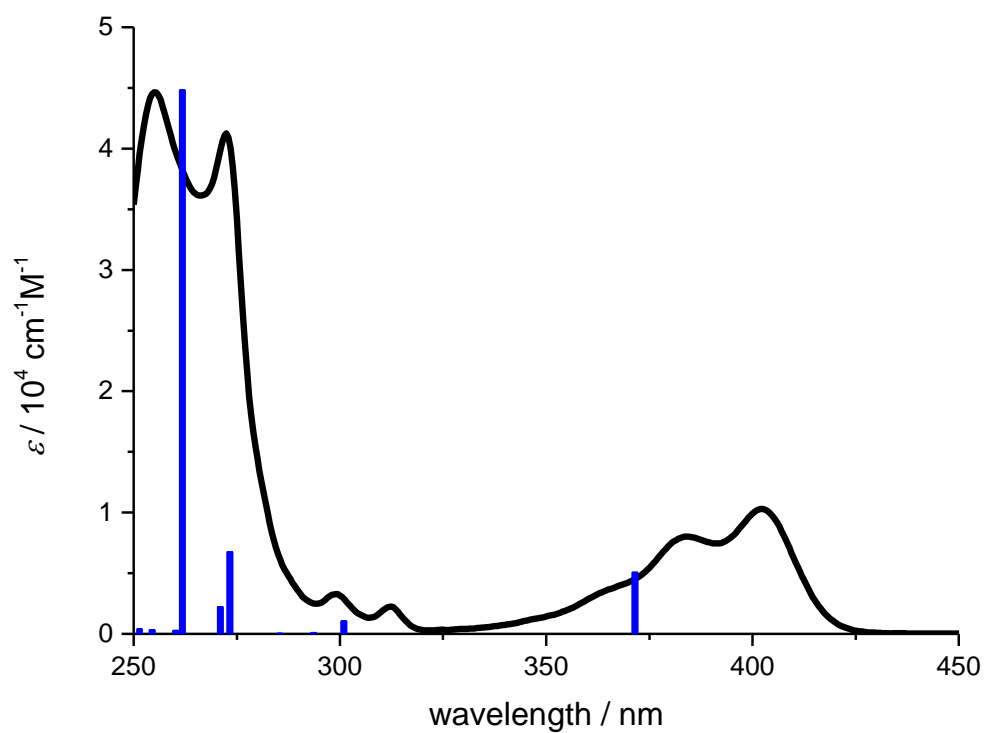

**Figure S43.** UV/Vis absorption spectrum of compound **5** and TD-DFT calculated oscillator strength (blue column) in dichloromethane at B3LYP/6-311+G(d,p) level.

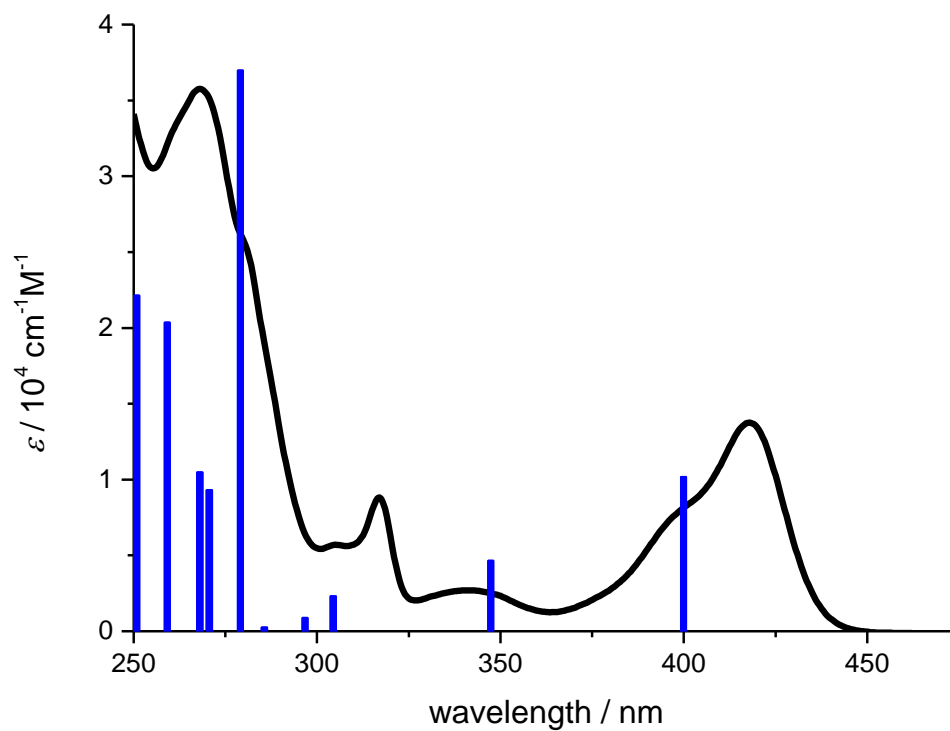

**Figure S44.** UV/Vis absorption spectrum of compound **7** and TD-DFT calculated oscillator strength (blue column) in dichloromethane at B3LYP/6-311+G(d,p) level.

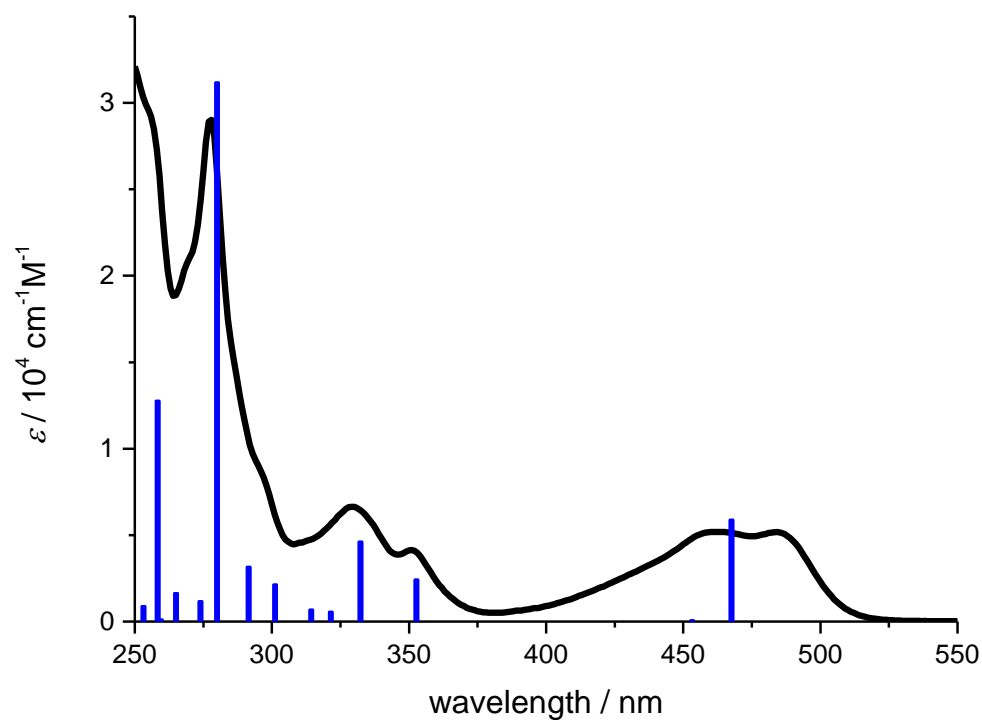

**Figure S45.** UV/Vis absorption spectrum of compound **11** and TD-DFT calculated oscillator strength (blue column) in dichloromethane at B3LYP/6-311+G(d,p) level.

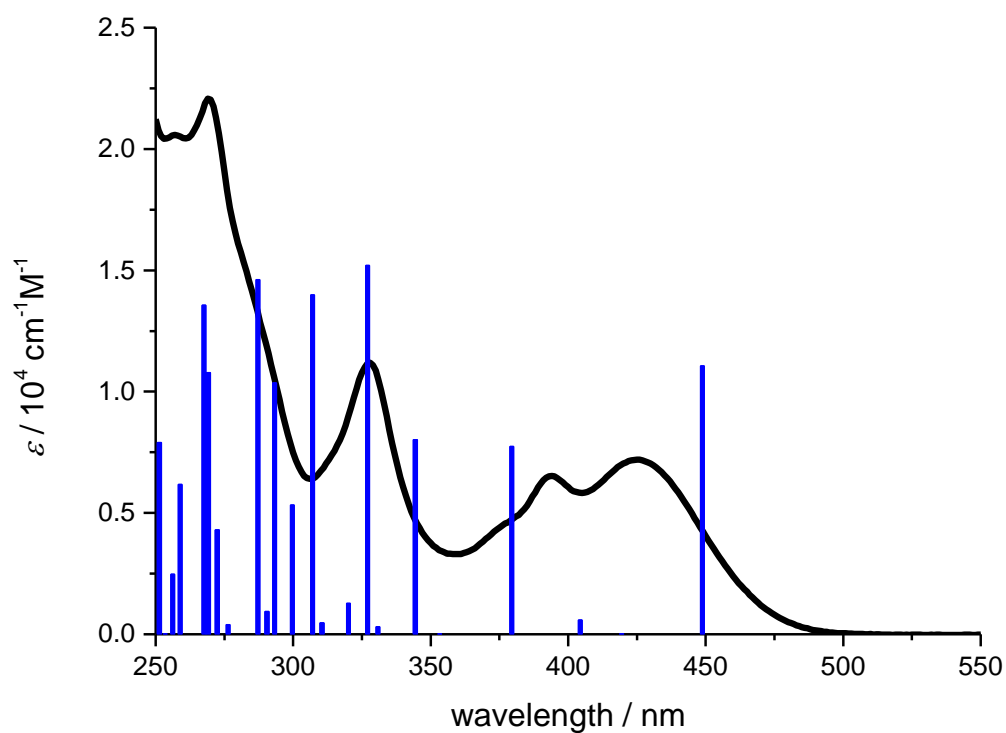

**Figure S46.** UV/Vis absorption spectrum of compound **12** and TD-DFT calculated oscillator strength (blue column) in dichloromethane at B3LYP/6-311+G(d,p) level.

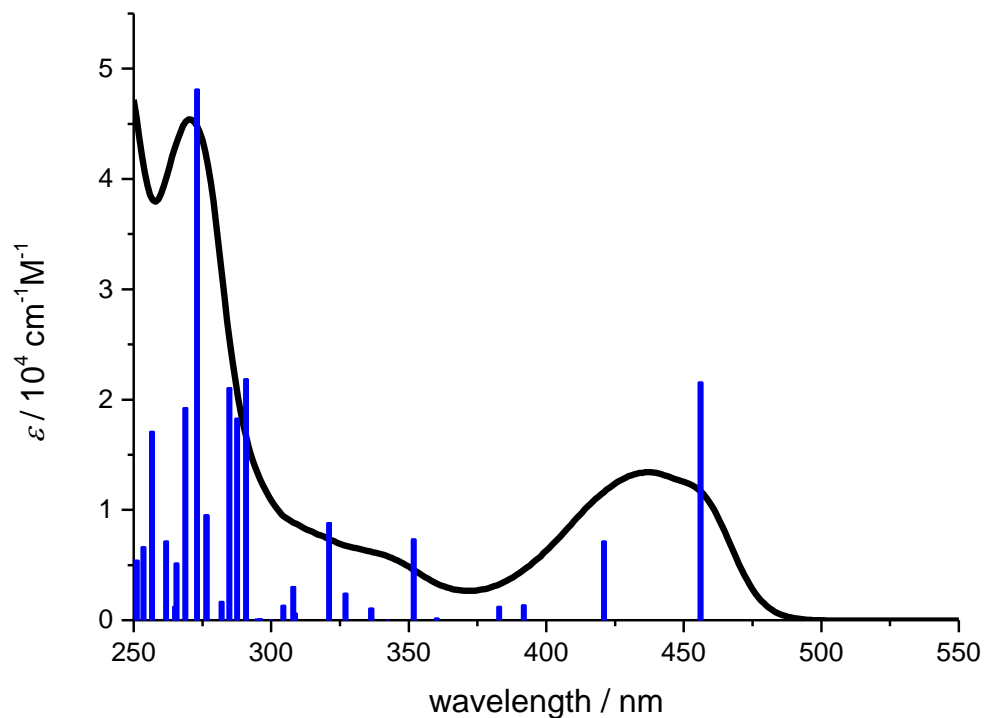

**Figure S47.** UV/Vis absorption spectrum of compound **13** and TD-DFT calculated oscillator strength (blue column) in dichloromethane at B3LYP/6-311+G(d,p) level.

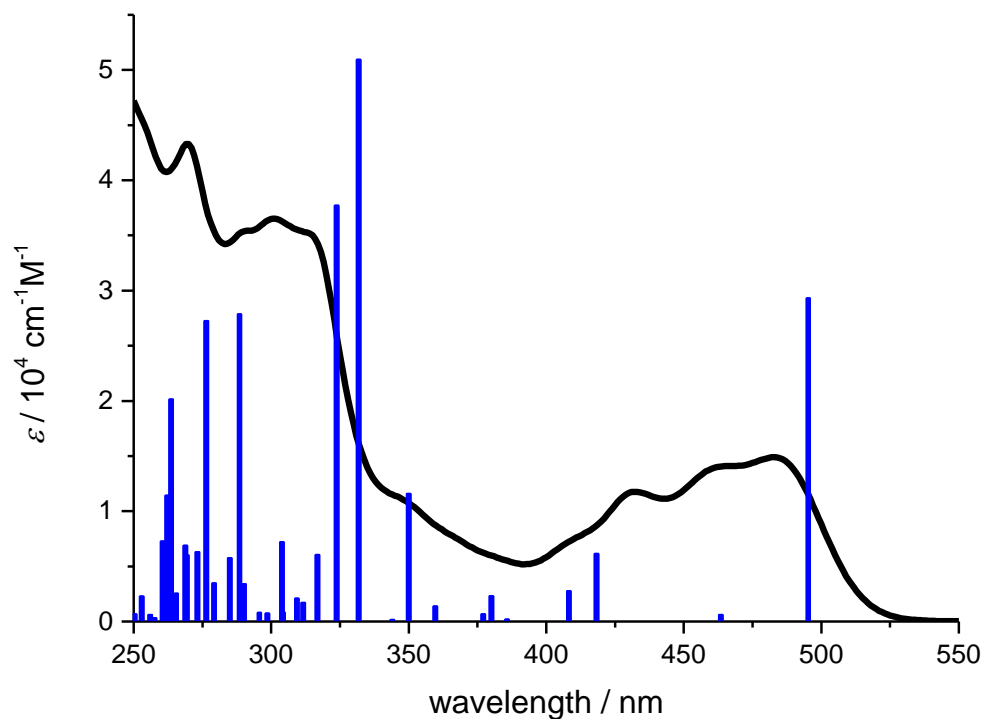

**Figure S48.** UV/Vis absorption spectrum of compound **14** and TD-DFT calculated oscillator strength (blue column) in dichloromethane at B3LYP/6-311+G(d,p) level.

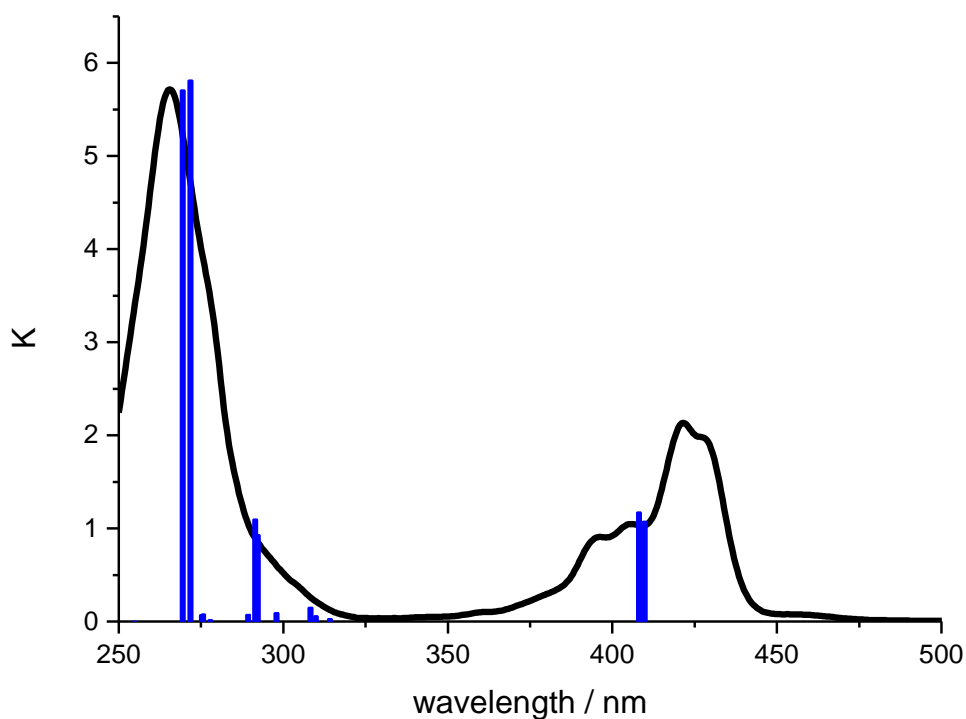

**Figure S49.** UV/Vis absorption spectrum of *tert*-butylated **1** and TD-DFT calculated oscillator strength (blue column) in dichloromethane at B3LYP/6-311+G(d,p) level.



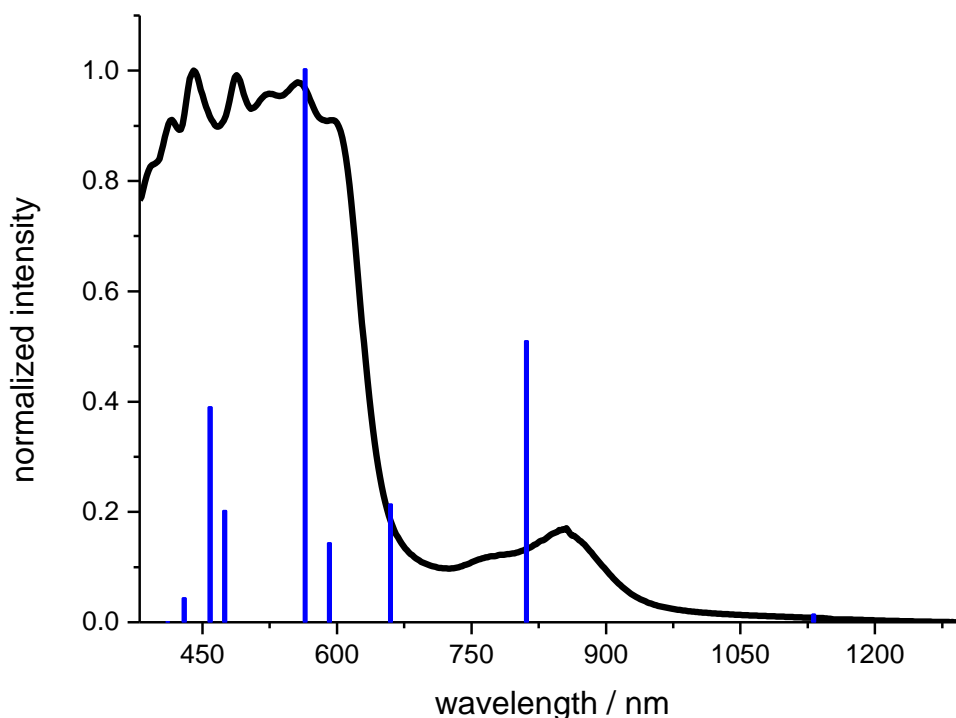

**Figure S50.** UV/Vis absorption spectrum of compound **11**<sup>+</sup> and TD-DFT calculated oscillator strength (blue column) in dichloromethane at UB3LYP/6-311+G(d,p) level.

**Table S3.** TD-DFT calculated first ten excited states of compound **5** in dichloromethane at B3LYP/6-311G+(d,p) level and the corresponding contributions.

---

|                  |           |           |          |
|------------------|-----------|-----------|----------|
| Excited State 1: | 3.3351 eV | 371.75 nm | f=0.1415 |
| 119 ->120        | 97.1%     |           |          |
| Excited State 2: | 3.7388 eV | 331.61 nm | f=0.0000 |
| 116 ->120        | 2.3%      |           |          |
| 118 ->120        | 95.1%     |           |          |
| Excited State 3: | 4.1167 eV | 301.17 nm | f=0.0293 |
| 117 ->120        | 15.4%     |           |          |
| 119 ->121        | 81.1%     |           |          |
| Excited State 4: | 4.2182 eV | 293.92 nm | f=0.0022 |
| 117 ->120        | 4.7%      |           |          |
| 119 ->122        | 93.3%     |           |          |
| Excited State 5: | 4.3408 eV | 285.63 nm | f=0.0012 |
| 117 ->120        | 23.9%     |           |          |
| 119 ->121        | 9.4%      |           |          |
| 119 ->122        | 3.5%      |           |          |
| 119 ->123        | 62.3%     |           |          |
| Excited State 6: | 4.5318 eV | 273.58 nm | f=0.1894 |

---

---

|                   |                              |
|-------------------|------------------------------|
| 115 ->120         | 26.3%                        |
| 116 ->120         | 26.1%                        |
| 117 ->120         | 28.2%                        |
| 119 ->123         | 12.7%                        |
| Excited State 7:  | 4.5709 eV 271.25 nm f=0.0619 |
| 115 ->120         | 20.0%                        |
| 116 ->120         | 68.6%                        |
| 117 ->120         | 4.8%                         |
| 119 ->123         | 2.9%                         |
| Excited State 8:  | 4.7319 eV 262.02 nm f=1.2539 |
| 115 ->120         | 49.2%                        |
| 116 ->120         | 2.1%                         |
| 117 ->120         | 19.4%                        |
| 119 ->121         | 5.5%                         |
| 119 ->123         | 19.3%                        |
| Excited State 9:  | 4.7615 eV 260.39 nm f=0.0071 |
| 114 ->120         | 96.3%                        |
| Excited State 10: | 4.8668 eV 254.76 nm f=0.0093 |
| 114 ->123         | 3.3%                         |
| 119 ->124         | 93.3%                        |

---

119: HOMO, 120: LUMO

**Table S4.** TD-DFT calculated first ten excited states of compound **7** in dichloromethane at B3LYP/6-311G+(d,p) level and the corresponding contributions.

---

|                  |                              |
|------------------|------------------------------|
| Excited State 1: | 3.0978 eV 400.23 nm f=0.1781 |
| 118 ->119        | 97.5%                        |
| Excited State 2: | 3.5663 eV 347.66 nm f=0.0814 |
| 117 ->119        | 96.2%                        |
| Excited State 3: | 3.6292 eV 341.63 nm f=0.0000 |
| 115 ->119        | 96.2%                        |
| Excited State 4: | 4.0690 eV 304.70 nm f=0.0404 |
| 118 ->120        | 92.6%                        |
| Excited State 5: | 4.1742 eV 297.03 nm f=0.0155 |
| 116 ->119        | 61.7%                        |
| 117 ->120        | 3.6%                         |
| 118 ->121        | 30.4%                        |
| Excited State 6: | 4.3365 eV 285.91 nm f=0.0045 |
| 114 ->119        | 88.8%                        |

---

---

|                   |                              |
|-------------------|------------------------------|
| 117 ->120         | 4.0%                         |
| 118 ->121         | 2.2%                         |
| Excited State 7:  | 4.4373 eV 279.41 nm f=0.6467 |
| 113 ->119         | 10.1%                        |
| 116 ->119         | 20.7%                        |
| 117 ->120         | 7.2%                         |
| 118 ->121         | 52.2%                        |
| Excited State 8:  | 4.5763 eV 270.93 nm f=0.1629 |
| 113 ->119         | 7.7%                         |
| 116 ->119         | 5.4%                         |
| 117 ->120         | 37.1%                        |
| 118 ->121         | 6.4%                         |
| 118 ->122         | 39.3%                        |
| Excited State 9:  | 4.6212 eV 268.30 nm f=0.1832 |
| 113 ->119         | 70.0%                        |
| 114 ->119         | 2.5%                         |
| 117 ->120         | 3.6%                         |
| 117 ->121         | 4.4%                         |
| 118 ->121         | 5.8%                         |
| 118 ->122         | 9.0%                         |
| Excited State 10: | 4.7786 eV 259.46 nm f=0.3563 |
| 113 ->119         | 4.5%                         |
| 116 ->119         | 5.7%                         |
| 117 ->120         | 26.3%                        |
| 117 ->121         | 21.4%                        |
| 118 ->122         | 31.4%                        |
| 118 ->126         | 2.3%                         |

---

118: HOMO, 119: LUMO

**Table S5.** TD-DFT calculated first ten excited states of compound **11** in dichloromethane at B3LYP/6-311G+(d,p) level and the corresponding contributions.

---

|                  |                              |
|------------------|------------------------------|
| Excited State 1: | 2.6492 eV 468.01 nm f=0.1672 |
| 124 ->125        | 96.9%                        |
| Excited State 2: | 2.7335 eV 453.58 nm f=0.0009 |
| 124 ->126        | 99.3%                        |
| Excited State 3: | 3.5116 eV 353.07 nm f=0.0682 |
| 122 ->125        | 3.1%                         |
| 123 ->125        | 92.0%                        |

---

---

Excited State 4: 3.6353 eV 341.06 nm f=0.0000

120 ->125 85.4%

120 ->126 6.2%

121 ->125 4.3%

Excited State 5: 3.7265 eV 332.71 nm f=0.1310

123 ->126 79.9%

124 ->127 9.2%

124 ->128 4.6%

Excited State 6: 3.8531 eV 321.78 nm f=0.0151

121 ->125 2.9%

122 ->126 4.4%

123 ->126 6.9%

124 ->127 72.8%

124 ->128 6.6%

Excited State 7: 3.9389 eV 314.77 nm f=0.0190

122 ->125 85.8%

123 ->125 2.5%

124 ->127 2.4%

124 ->128 4.9%

Excited State 8: 4.1118 eV 301.53 nm f=0.0604

121 ->125 34.0%

122 ->125 2.1%

122 ->126 3.7%

123 ->126 3.4%

124 ->127 2.8%

124 ->128 47.0%

Excited State 9: 4.2474 eV 291.91 nm f=0.0894

119 ->125 3.1%

121 ->125 7.1%

122 ->125 2.8%

122 ->126 63.9%

123 ->127 2.3%

124 ->127 4.0%

124 ->128 12.5%

Excited State 10: 4.4218 eV 280.39 nm f=0.8895

119 ->125 5.5%

121 ->125 39.0%

122 ->125 2.0%

---

---

|           |       |
|-----------|-------|
| 122 ->126 | 15.4% |
| 123 ->126 | 2.4%  |
| 123 ->127 | 6.0%  |
| 124 ->127 | 3.8%  |
| 124 ->128 | 17.5% |

---

124: HOMO, 125: LUMO

**Table S6.** TD-DFT calculated first ten excited states of compound **12** in dichloromethane at B3LYP/6-311G+(d,p) level and the corresponding contributions.

---

|                  |           |           |          |
|------------------|-----------|-----------|----------|
| Excited State 1: | 2.7601 eV | 449.20 nm | f=0.1314 |
| 131 ->132        | 97.9%     |           |          |
| Excited State 2: | 2.9534 eV | 419.80 nm | f=0.0002 |
| 126 ->132        | 2.2%      |           |          |
| 127 ->132        | 8.3%      |           |          |
| 129 ->132        | 80.0%     |           |          |
| 130 ->132        | 3.2%      |           |          |
| Excited State 3: | 3.0631 eV | 404.77 nm | f=0.0070 |
| 129 ->132        | 2.6%      |           |          |
| 130 ->132        | 92.8%     |           |          |
| 131 ->133        | 2.6%      |           |          |
| Excited State 4: | 3.2639 eV | 379.87 nm | f=0.0919 |
| 130 ->132        | 2.4%      |           |          |
| 131 ->133        | 94.0%     |           |          |
| Excited State 5: | 3.5055 eV | 353.69 nm | f=0.0001 |
| 127 ->132        | 41.6%     |           |          |
| 127 ->133        | 30.1%     |           |          |
| 128 ->132        | 2.4%      |           |          |
| 128 ->133        | 2.5%      |           |          |
| 129 ->132        | 4.8%      |           |          |
| 129 ->133        | 14.2%     |           |          |
| Excited State 6: | 3.5959 eV | 344.80 nm | f=0.0952 |
| 128 ->133        | 2.6%      |           |          |
| 130 ->133        | 91.7%     |           |          |
| 131 ->134        | 2.3%      |           |          |
| Excited State 7: | 3.7431 eV | 331.23 nm | f=0.0036 |
| 123 ->132        | 3.1%      |           |          |
| 125 ->132        | 3.7%      |           |          |
| 126 ->132        | 6.4%      |           |          |

---

---

|                   |                              |
|-------------------|------------------------------|
| 127 ->132         | 3.0%                         |
| 128 ->132         | 69.0%                        |
| 131 ->134         | 7.7%                         |
| Excited State 8:  | 3.7866 eV 327.43 nm f=0.1805 |
| 126 ->132         | 10.4%                        |
| 128 ->132         | 4.0%                         |
| 131 ->134         | 78.4%                        |
| Excited State 9:  | 3.8688 eV 320.47 nm f=0.0151 |
| 123 ->132         | 16.5%                        |
| 124 ->132         | 6.1%                         |
| 125 ->132         | 26.9%                        |
| 126 ->132         | 6.8%                         |
| 127 ->133         | 8.4%                         |
| 128 ->132         | 18.6%                        |
| 129 ->134         | 10.4%                        |
| Excited State 10: | 3.9883 eV 310.87 nm f=0.0055 |
| 125 ->132         | 2.3%                         |
| 126 ->132         | 2.3%                         |
| 127 ->132         | 43.4%                        |
| 127 ->133         | 16.5%                        |
| 129 ->132         | 3.3%                         |
| 129 ->133         | 26.2%                        |

---

131: HOMO, 132: LUMO

**Table S7.** TD-DFT calculated first ten excited states of compound **13** in dichloromethane at B3LYP/6-311G+(d,p) level and the corresponding contributions.

---

|                  |                              |
|------------------|------------------------------|
| Excited State 1: | 2.7185 eV 456.07 nm f=0.2940 |
| 150 -> 151       | 98.3%                        |
| Excited State 2: | 2.9454 eV 420.94 nm f=0.0974 |
| 150 -> 152       | 96.0%                        |
| Excited State 3: | 3.1648 eV 391.76 nm f=0.0185 |
| 149 -> 151       | 6.5%                         |
| 150 -> 153       | 91.0%                        |
| Excited State 4: | 3.2377 eV 382.94 nm f=0.0166 |
| 149 -> 151       | 88.6%                        |
| 150 -> 153       | 6.2%                         |
| Excited State 5: | 3.4420 eV 360.21 nm f=0.0024 |
| 144 -> 151       | 28.7%                        |

---

---

|                   |                              |
|-------------------|------------------------------|
| 145 -> 151        | 2.7%                         |
| 146 -> 151        | 45.2%                        |
| 147 -> 151        | 12.3%                        |
| 149 -> 151        | 3.2%                         |
| 149 -> 152        | 3.1%                         |
| Excited State 6:  | 3.5247 eV 351.76 nm f=0.1002 |
| 149 -> 152        | 90.3%                        |
| Excited State 7:  | 3.6199 eV 342.50 nm f=0.0002 |
| 144 -> 151        | 5.4%                         |
| 144 -> 152        | 10.3%                        |
| 145 -> 151        | 15.4%                        |
| 145 -> 152        | 53.5%                        |
| 145 -> 153        | 3.0%                         |
| 146 -> 152        | 6.6%                         |
| Excited State 8:  | 3.6860 eV 336.36 nm f=0.0143 |
| 148 -> 151        | 90.5%                        |
| Excited State 9:  | 3.7914 eV 327.02 nm f=0.0331 |
| 144 -> 151        | 4.6%                         |
| 146 -> 151        | 3.5%                         |
| 147 -> 151        | 44.2%                        |
| 148 -> 151        | 3.1%                         |
| 148 -> 153        | 2.8%                         |
| 149 -> 153        | 34.7%                        |
| Excited State 10: | 3.8619 eV 321.05 nm f=0.1203 |
| 144 -> 151        | 3.1%                         |
| 147 -> 151        | 26.5%                        |
| 148 -> 152        | 5.1%                         |
| 148 -> 153        | 2.8%                         |
| 149 -> 153        | 55.2%                        |

---

150: HOMO, 151: LUMO

**Table S8.** TD-DFT calculated first ten excited states of compound **14** in dichloromethane at B3LYP/6-311G+(d,p) level and the corresponding contributions.

---

|                  |                                        |
|------------------|----------------------------------------|
| Excited State 1: | 2.5014 eV 495.66 nm f=0.3989           |
| 163 -> 164       | 97.8%                                  |
| Excited State 2: | 2.6728 eV 463.87 nm f=0.0076           |
| 162 -> 164       | 97.8%                                  |
| Excited State 3: | Singlet-A 2.9612 eV 418.69 nm f=0.0828 |

---

---

|                   |                              |
|-------------------|------------------------------|
| 161 -> 164        | 9.6%                         |
| 163 -> 165        | 87.0%                        |
| Excited State 4:  | 3.0348 eV 408.54 nm f=0.0369 |
| 161 -> 164        | 85.7%                        |
| 163 -> 165        | 8.4%                         |
| Excited State 5:  | 3.2109 eV 386.14 nm f=0.0019 |
| 157 -> 164        | 22.1%                        |
| 158 -> 164        | 7.7%                         |
| 159 -> 164        | 53.2%                        |
| 160 -> 164        | 10.3%                        |
| 161 -> 164        | 2.2%                         |
| Excited State 6:  | 3.2589 eV 380.44 nm f=0.0305 |
| 162 -> 165        | 12.9%                        |
| 163 -> 166        | 82.2%                        |
| Excited State 7:  | 3.2842 eV 377.52 nm f=0.0083 |
| 160 -> 164        | 3.5%                         |
| 162 -> 165        | 76.7%                        |
| 163 -> 166        | 13.2%                        |
| Excited State 8:  | 3.4432 eV 360.09 nm f=0.0181 |
| 159 -> 164        | 4.5%                         |
| 160 -> 164        | 43.7%                        |
| 161 -> 165        | 2.5%                         |
| 162 -> 165        | 5.7%                         |
| 162 -> 166        | 37.6%                        |
| Excited State 9:  | 3.5390 eV 350.33 nm f=0.1570 |
| 160 -> 164        | 2.6%                         |
| 161 -> 165        | 89.8%                        |
| Excited State 10: | 3.6000 eV 344.40 nm f=0.0012 |
| 157 -> 164        | 10.6%                        |
| 157 -> 165        | 24.9%                        |
| 158 -> 164        | 11.9%                        |
| 158 -> 165        | 38.8%                        |
| 159 -> 165        | 5.9%                         |

---

163: HOMO, 164: LUMO

**Table S9.** TD-DFT calculated first ten excited states of *tert*-butylated **1** in dichloromethane at B3LYP/6-311G+(d,p) level and the corresponding contributions.

---

|                  |                              |
|------------------|------------------------------|
| Excited State 1: | 3.0232 eV 410.11 nm f=0.1403 |
|------------------|------------------------------|

---



---

|                  |                              |
|------------------|------------------------------|
| 131 ->132        | 95.2%                        |
| 131 ->133        | 2.4%                         |
| Excited State 2: | 3.0358 eV 408.41 nm f=0.1532 |
| 131 ->132        | 2.4%                         |
| 131 ->133        | 95.1%                        |
| Excited State 3: | 3.3923 eV 365.49 nm f=0.0000 |
| 126 ->132        | 7.5%                         |
| 126 ->133        | 3.7%                         |
| 127 ->132        | 4.7%                         |
| 127 ->133        | 6.6%                         |
| 127 ->136        | 2.9%                         |
| 130 ->132        | 2.5%                         |
| 130 ->133        | 71.2%                        |
| Excited State 4: | 3.4003 eV 364.63 nm f=0.0000 |
| 126 ->132        | 5.9%                         |
| 126 ->133        | 8.8%                         |
| 126 ->136        | 2.8%                         |
| 127 ->132        | 10.0%                        |
| 127 ->133        | 4.9%                         |
| 130 ->132        | 64.4%                        |
| 130 ->133        | 2.3%                         |
| Excited State 5: | 3.5789 eV 346.43 nm f=0.0000 |
| 126 ->132        | 45.0%                        |
| 127 ->133        | 45.7%                        |
| 130 ->136        | 5.0%                         |
| Excited State 6: | 3.9421 eV 314.52 nm f=0.0037 |
| 128 ->132        | 27.5%                        |
| 129 ->133        | 66.7%                        |
| Excited State 7: | 3.9965 eV 310.24 nm f=0.0075 |
| 128 ->132        | 14.3%                        |
| 128 ->133        | 29.5%                        |
| 129 ->132        | 49.8%                        |
| 129 ->133        | 2.2%                         |
| Excited State 8: | 4.0175 eV 308.61 nm f=0.0192 |

---

---

|                   |                              |
|-------------------|------------------------------|
| 125 ->133         | 4.4%                         |
| 128 ->132         | 52.1%                        |
| 128 ->133         | 3.0%                         |
| 129 ->132         | 11.7%                        |
| 129 ->133         | 24.8%                        |
| Excited State 9:  | 4.0628 eV 305.17 nm f=0.0000 |
| 126 ->132         | 10.8%                        |
| 126 ->133         | 19.3%                        |
| 127 ->132         | 27.2%                        |
| 127 ->133         | 10.2%                        |
| 130 ->132         | 30.8%                        |
| Excited State 10: | 4.0848 eV 303.53 nm f=0.0000 |
| 126 ->132         | 24.4%                        |
| 126 ->133         | 8.7%                         |
| 127 ->132         | 14.8%                        |
| 127 ->133         | 26.9%                        |
| 130 ->133         | 23.6%                        |

---

131: HOMO, 132: LUMO

**Table S10.** TD-DFT calculated first ten excited states of **11<sup>+</sup>** in dichloromethane at B3LYP/6-311G+(d,p) level and the corresponding contributions.

---

|                  |         |           |            |          |                                  |
|------------------|---------|-----------|------------|----------|----------------------------------|
| Excited State 1: | 2.024-A | 1.0963 eV | 1130.91 nm | f=0.0022 | $\langle S^{*2} \rangle = 0.774$ |
| 122B ->124B      | 1.1%    |           |            |          |                                  |
| 123B ->124B      | 97.6%   |           |            |          |                                  |
| Excited State 2: | 2.029-A | 1.5297 eV | 810.49 nm  | f=0.0787 | $\langle S^{*2} \rangle = 0.779$ |
| 121B ->124B      | 3.1%    |           |            |          |                                  |
| 122B ->124B      | 93.6%   |           |            |          |                                  |
| 123B ->124B      | 1.0%    |           |            |          |                                  |
| Excited State 3: | 2.029-A | 1.8818 eV | 658.85 nm  | f=0.0330 | $\langle S^{*2} \rangle = 0.779$ |
| 121B ->124B      | 93.9%   |           |            |          |                                  |
| 122B ->124B      | 3.2%    |           |            |          |                                  |
| Excited State 4: | 2.090-A | 1.9132 eV | 648.06 nm  | f=0.0000 | $\langle S^{*2} \rangle = 0.842$ |
| 120B ->124B      | 96.2%   |           |            |          |                                  |
| 120B ->126B      | 2.3%    |           |            |          |                                  |
| Excited State 5: | 2.094-A | 2.0991 eV | 590.66 nm  | f=0.0222 | $\langle S^{*2} \rangle = 0.846$ |
| 122A ->125A      | 2.0%    |           |            |          |                                  |

---

---

|                  |         |           |           |          |                                   |
|------------------|---------|-----------|-----------|----------|-----------------------------------|
| 124A ->125A      | 57.5%   |           |           |          |                                   |
| 124A ->126A      | 1.4%    |           |           |          |                                   |
| 119B ->124B      | 35.3%   |           |           |          |                                   |
| Excited State 6: | 2.112-A | 2.1996 eV | 563.66 nm | f=0.1549 | $\langle S^{**2} \rangle = 0.865$ |
| 124A ->125A      | 23.7%   |           |           |          |                                   |
| 124A ->126A      | 9.7%    |           |           |          |                                   |
| 119B ->124B      | 56.8%   |           |           |          |                                   |
| 122B ->125B      | 1.7%    |           |           |          |                                   |
| 123B ->125B      | 2.9%    |           |           |          |                                   |
| Excited State 7: | 2.429-A | 2.6156 eV | 474.01 nm | f=0.0312 | $\langle S^{**2} \rangle = 1.224$ |
| 122A ->126A      | 1.3%    |           |           |          |                                   |
| 123A ->125A      | 3.6%    |           |           |          |                                   |
| 123A ->126A      | 6.1%    |           |           |          |                                   |
| 124A ->125A      | 2.6%    |           |           |          |                                   |
| 124A ->126A      | 8.8%    |           |           |          |                                   |
| 118B ->124B      | 63.1%   |           |           |          |                                   |
| 123B ->126B      | 5.7%    |           |           |          |                                   |
| Excited State 8: | 2.098-A | 2.7083 eV | 457.79 nm | f=0.0602 | $\langle S^{**2} \rangle = 0.850$ |
| 124A ->125A      | 6.0%    |           |           |          |                                   |
| 124A ->126A      | 68.9%   |           |           |          |                                   |
| 118B ->124B      | 15.9%   |           |           |          |                                   |
| 119B ->124B      | 2.6%    |           |           |          |                                   |
| 122B ->126B      | 1.4%    |           |           |          |                                   |
| 123B ->125B      | 1.4%    |           |           |          |                                   |
| Excited State 9: | 3.198-A | 2.8907 eV | 428.91 nm | f=0.0068 | $\langle S^{**2} \rangle = 2.306$ |
| 120A ->126A      | 1.4%    |           |           |          |                                   |
| 123A ->125A      | 18.5%   |           |           |          |                                   |
| 123A ->126A      | 13.6%   |           |           |          |                                   |
| 123A ->127A      | 2.9%    |           |           |          |                                   |
| 124A ->125A      | 1.1%    |           |           |          |                                   |
| 124A ->126A      | 4.0%    |           |           |          |                                   |
| 118B ->124B      | 14.3%   |           |           |          |                                   |
| 121B ->126B      | 1.2%    |           |           |          |                                   |
| 123B ->125B      | 16.6%   |           |           |          |                                   |

---

---

|                   |         |           |           |          |                                   |
|-------------------|---------|-----------|-----------|----------|-----------------------------------|
| 123B ->126B       | 12.6%   |           |           |          |                                   |
| 123B ->127B       | 2.2%    |           |           |          |                                   |
| Excited State 10: | 3.423-A | 3.0203 eV | 410.50 nm | f=0.0001 | $\langle S^{**2} \rangle = 2.679$ |
| 120A ->125A       | 1.4%    |           |           |          |                                   |
| 122A ->125A       | 1.5%    |           |           |          |                                   |
| 123A ->125A       | 28.9%   |           |           |          |                                   |
| 123A ->126A       | 21.8%   |           |           |          |                                   |
| 124A ->125A       | 1.3%    |           |           |          |                                   |
| 119B ->125B       | 1.1%    |           |           |          |                                   |
| 123B ->125B       | 16.5%   |           |           |          |                                   |
| 123B ->126B       | 18.3%   |           |           |          |                                   |

---

124A: HOMO ( $\alpha$ ), 125A: LUMO ( $\alpha$ ), 123B: HOMO ( $\beta$ ), 124B: LUMO ( $\beta$ )

### Cartesian coordinates for theoretically optimized structures

5 opt B3LYP/6-31G(d,p) HF = -1333.674290 Hartree imaginary frequency 0

---

|   |             |             |             |
|---|-------------|-------------|-------------|
| C | -0.54677800 | -3.64133300 | 0.00744800  |
| C | 0.15421700  | -2.44836500 | 0.01149300  |
| C | -0.53487500 | -1.21686000 | 0.00822100  |
| C | -1.94568400 | -1.24456100 | 0.00070000  |
| C | -2.62368200 | -2.47750600 | -0.00304100 |
| C | -1.95908600 | -3.69605900 | 0.00014900  |
| C | -1.94564600 | 1.24461700  | 0.00074100  |
| C | -0.53483800 | 1.21687300  | 0.00826900  |
| C | 0.15429200  | 2.44835700  | 0.01161000  |
| H | 1.23694300  | 2.46381500  | 0.01753000  |
| C | -0.54666700 | 3.64134600  | 0.00760800  |
| C | -1.95897300 | 3.69611500  | 0.00029000  |
| C | -2.62360600 | 2.47758300  | -0.00295600 |
| H | 0.02666400  | -4.56389600 | 0.01015000  |
| H | -3.70488700 | -2.41153100 | -0.00863200 |
| H | 0.02680400  | 4.56389100  | 0.01036300  |
| H | -3.70481300 | 2.41164100  | -0.00855700 |
| C | -2.73508100 | 0.00004000  | -0.00338600 |
| O | -3.96953500 | 0.00005900  | -0.00967700 |
| C | 1.59365100  | -0.00002600 | 0.01834600  |
| C | 2.30250300  | 0.00005000  | -1.18578200 |
| C | 2.29267600  | -0.00012200 | 1.22384200  |
| C | 3.69442600  | 0.00003100  | -1.17259900 |
| C | 3.68928700  | -0.00014300 | 1.22470400  |
| H | 1.74213900  | -0.00018000 | 2.15947400  |
| C | 4.42304900  | -0.00006600 | 0.03027000  |
| H | 4.21990900  | 0.00009200  | -2.12249800 |
| H | 4.20091600  | -0.00021900 | 2.17970100  |
| N | 0.15354600  | -0.00000400 | 0.01236600  |
| C | -2.67921500 | -5.05471300 | -0.00383800 |
| C | -2.28077100 | -5.85383700 | 1.25967500  |
| C | -4.21086000 | -4.89606500 | -0.01153000 |
| C | -2.26799200 | -5.85317200 | -1.26366800 |

---

---

|   |             |             |             |
|---|-------------|-------------|-------------|
| H | -1.20226200 | -6.03384000 | 1.30607800  |
| H | -2.56922100 | -5.31656200 | 2.16892200  |
| H | -2.78033000 | -6.82918900 | 1.26805800  |
| H | -4.55948500 | -4.35852700 | -0.89898300 |
| H | -4.68422700 | -5.88330300 | -0.01420900 |
| H | -4.56842700 | -4.35905100 | 0.87267800  |
| H | -2.76731400 | -6.82858300 | -1.27756200 |
| H | -2.54734900 | -5.31548600 | -2.17550900 |
| H | -1.18904500 | -6.03300200 | -1.29929800 |
| C | -2.67906000 | 5.05479100  | -0.00364600 |
| C | -2.26778100 | 5.85330500  | -1.26342300 |
| C | -4.21071000 | 4.89619100  | -0.01138600 |
| C | -2.28062400 | 5.85383600  | 1.25992100  |
| H | -1.18882800 | 6.03310300  | -1.29901700 |
| H | -2.54713400 | 5.31567700  | -2.17529900 |
| H | -2.76707200 | 6.82873200  | -1.27727600 |
| H | -4.56831800 | 4.35914900  | 0.87278800  |
| H | -4.68404600 | 5.88344300  | -0.01403500 |
| H | -4.55932700 | 4.35870200  | -0.89887200 |
| H | -2.78015400 | 6.82920200  | 1.26834400  |
| H | -2.56911200 | 5.31652000  | 2.16913200  |
| H | -1.20211100 | 6.03380400  | 1.30635900  |
| C | 5.96224800  | -0.00008400 | -0.00531200 |
| C | 6.45809500  | -1.26255000 | -0.74996700 |
| C | 6.45812800  | 1.26247700  | -0.74978400 |
| C | 6.58012100  | -0.00019500 | 1.40557300  |
| H | 6.12657200  | -2.17361800 | -0.24135500 |
| H | 6.08935800  | -1.30129700 | -1.77909900 |
| H | 7.55285700  | -1.27455700 | -0.78855200 |
| H | 6.12663200  | 2.17348000  | -0.24103700 |
| H | 7.55289100  | 1.27445900  | -0.78836900 |
| H | 6.08939000  | 1.30138400  | -1.77890900 |
| H | 7.67184800  | -0.00020400 | 1.32830600  |
| H | 6.29122500  | 0.88713000  | 1.97824900  |

---

---

|   |            |             |             |
|---|------------|-------------|-------------|
| H | 6.29120200 | -0.88759500 | 1.97812000  |
| H | 1.75812700 | 0.00012300  | -2.12498500 |
| H | 1.23686700 | -2.46385700 | 0.01739300  |

---

7 opt B3LYP/6-31G(d,p) HF = -1332.481996 Hartree imaginary frequency 0

---

|   |             |             |             |
|---|-------------|-------------|-------------|
| C | -2.29785700 | 1.98406100  | 0.00024600  |
| C | -1.62218200 | 0.76858100  | 0.00013800  |
| C | -0.21600200 | 0.77971700  | -0.00003900 |
| C | 0.52406400  | 1.95625600  | -0.00016400 |
| C | -0.18749100 | 3.16743200  | -0.00007900 |
| C | -1.58776800 | 3.20709800  | 0.00014000  |
| C | 2.52107000  | 0.46468200  | -0.00025900 |
| C | 1.68873800  | -0.68583700 | 0.00001600  |
| C | 2.30630400  | -1.94791200 | 0.00050200  |
| H | 1.71792400  | -2.85175600 | 0.00101600  |
| C | 3.68854300  | -2.05756500 | 0.00052800  |
| C | 4.53875100  | -0.93417700 | 0.00009800  |
| C | 3.91690800  | 0.30932300  | -0.00024500 |
| H | -3.38370200 | 1.99105200  | 0.00039600  |
| H | 0.40439700  | 4.07415200  | -0.00019500 |
| H | 4.11443700  | -3.05658800 | 0.00092200  |
| H | 4.48398600  | 1.23227700  | -0.00048400 |
| C | 1.99056100  | 1.85911100  | -0.00041300 |
| O | 2.72847800  | 2.84462600  | -0.00074000 |
| C | -0.80646400 | -1.40187600 | -0.00015400 |
| C | -2.00480400 | -0.63371800 | 0.00009000  |
| C | -0.88788900 | -2.79292500 | -0.00056500 |
| C | -3.24826800 | -1.26007100 | 0.00011600  |
| C | -2.15091500 | -3.39224600 | -0.00053700 |
| H | -0.01800100 | -3.43289300 | -0.00104200 |
| C | -3.34893900 | -2.65833600 | -0.00015700 |
| H | -4.14395700 | -0.64602500 | 0.00031900  |
| H | -2.18401900 | -4.47503900 | -0.00085400 |
| N | 0.29699900  | -0.50819800 | -0.00011100 |
| C | -2.37602100 | 4.53188600  | 0.00025400  |

---

---

|   |             |             |             |
|---|-------------|-------------|-------------|
| C | -3.26777400 | 4.60187100  | 1.26272800  |
| C | -1.44879700 | 5.76176000  | 0.00008900  |
| C | -3.26819100 | 4.60184900  | -1.26192600 |
| H | -3.98503700 | 3.77648000  | 1.30407300  |
| H | -2.66079800 | 4.56251600  | 2.17299300  |
| H | -3.83827300 | 5.53730800  | 1.27474500  |
| H | -0.80735300 | 5.78887100  | -0.88646700 |
| H | -2.05126200 | 6.67575800  | 0.00017700  |
| H | -0.80706400 | 5.78889100  | 0.88643700  |
| H | -3.83869000 | 5.53728900  | -1.27377300 |
| H | -2.66151600 | 4.56247400  | -2.17239100 |
| H | -3.98547200 | 3.77646200  | -1.30301900 |
| C | 6.06563500  | -1.11705300 | 0.00009300  |
| C | 6.48946900  | -1.90576100 | -1.26170700 |
| C | 6.80855500  | 0.23172000  | -0.00037400 |
| C | 6.48959300  | -1.90495200 | 1.26235700  |
| H | 6.02326700  | -2.89509700 | -1.30135800 |
| H | 6.20884900  | -1.36714400 | -2.17257000 |
| H | 7.57552500  | -2.05050600 | -1.27331700 |
| H | 6.56948900  | 0.82854600  | 0.88547800  |
| H | 7.88921400  | 0.05681600  | -0.00037900 |
| H | 6.56938900  | 0.82798700  | -0.88657500 |
| H | 7.57565200  | -2.04967300 | 1.27395900  |
| H | 6.20904900  | -1.36575800 | 2.17290200  |
| H | 6.02341300  | -2.89427000 | 1.30268300  |
| C | -4.73678300 | -3.32699700 | -0.00008100 |
| C | -5.51836900 | -2.89141800 | 1.26212000  |
| C | -5.51884300 | -2.89078800 | -1.26177000 |
| C | -4.64687600 | -4.86479400 | -0.00048800 |
| H | -4.99164200 | -3.19422000 | 2.17289600  |
| H | -5.65601400 | -1.80681000 | 1.30208700  |
| H | -6.51205600 | -3.35318800 | 1.27416700  |
| H | -4.99245400 | -3.19312300 | -2.17289600 |
| H | -6.51252800 | -3.35256800 | -1.27367700 |

---



---

|   |             |             |             |
|---|-------------|-------------|-------------|
| H | -5.65652800 | -1.80616400 | -1.30114100 |
| H | -5.65460500 | -5.29226200 | -0.00041400 |
| H | -4.12926100 | -5.24324900 | -0.88803900 |
| H | -4.12894000 | -5.24370200 | 0.88668300  |

---

**11** opt B3LYP/6-31G(d,p) HF = -1408.692864 Hartree    imaginary frequency 0

---

|   |             |             |             |
|---|-------------|-------------|-------------|
| C | -2.40591800 | 2.12827500  | -0.00000800 |
| C | -1.70660600 | 0.92614800  | -0.00003500 |
| C | -0.29935700 | 0.96664900  | -0.00006200 |
| C | 0.41495100  | 2.15801900  | -0.00004400 |
| C | -0.31961200 | 3.35500100  | -0.00001800 |
| C | -1.72061900 | 3.36556400  | -0.00000500 |
| C | 2.43436100  | 0.69085700  | -0.00001200 |
| C | 1.63340700  | -0.47706500 | -0.00004700 |
| C | 2.27504600  | -1.74896200 | -0.00005600 |
| C | 3.67394200  | -1.77115800 | -0.00000600 |
| C | 4.49321700  | -0.62839000 | 0.00004700  |
| C | 3.83868200  | 0.59165000  | 0.00003500  |
| H | -3.49168500 | 2.11375300  | 0.00001400  |
| H | 0.25343400  | 4.27368600  | -0.00000600 |
| H | 4.14252400  | -2.75096400 | -0.00001400 |
| H | 4.37006900  | 1.53503800  | 0.00006100  |
| C | 1.87820300  | 2.07946900  | -0.00002800 |
| O | 2.60528100  | 3.07336300  | -0.00000200 |
| C | -0.85350600 | -1.21507300 | -0.00005700 |
| C | -2.05920300 | -0.48263500 | -0.00003000 |
| C | -0.86492300 | -2.61749800 | -0.00007700 |
| C | -3.29765000 | -1.14070000 | -0.00001000 |
| C | -2.12373100 | -3.23266200 | -0.00005200 |
| C | -3.34917500 | -2.53342800 | -0.00001700 |
| H | -4.20465400 | -0.54809600 | 0.00000900  |
| H | -2.13668200 | -4.31863500 | -0.00006400 |
| N | 0.23694500  | -0.30730900 | -0.00008300 |
| C | -2.53592500 | 4.67386600  | 0.00002300  |
| C | -3.42916500 | 4.72546700  | 1.26235700  |

---

---

|   |             |             |             |
|---|-------------|-------------|-------------|
| C | -1.63427800 | 5.92263100  | 0.00000800  |
| C | -3.42922700 | 4.72548400  | -1.26226600 |
| H | -4.12942200 | 3.88559400  | 1.30349400  |
| H | -2.82168600 | 4.69848000  | 2.17273600  |
| H | -4.01868500 | 5.64903500  | 1.27432000  |
| H | -0.99342300 | 5.96306000  | -0.88647500 |
| H | -2.25549000 | 6.82398100  | 0.00002100  |
| H | -0.99339100 | 5.96305900  | 0.88646800  |
| H | -4.01874800 | 5.64905200  | -1.27418600 |
| H | -2.82179300 | 4.69851200  | -2.17267600 |
| H | -4.12948600 | 3.88561200  | -1.30338200 |
| C | 6.02411500  | -0.77254100 | 0.00008900  |
| C | 6.46916200  | -1.54846300 | -1.26225700 |
| C | 6.72881500  | 0.59658400  | 0.00021700  |
| C | 6.46909300  | -1.54865300 | 1.26234000  |
| H | 6.03100400  | -2.55046500 | -1.30301800 |
| H | 6.17384700  | -1.01711000 | -2.17271300 |
| H | 7.55879600  | -1.66271600 | -1.27366100 |
| H | 6.47258000  | 1.18593400  | 0.88624800  |
| H | 7.81395400  | 0.45232200  | 0.00026500  |
| H | 6.47267800  | 1.18605200  | -0.88576500 |
| H | 7.55872700  | -1.66290100 | 1.27378600  |
| H | 6.17372700  | -1.01744100 | 2.17286200  |
| H | 6.03094500  | -2.55066700 | 1.30292800  |
| C | 1.62705100  | -3.06701200 | -0.00012800 |
| H | 2.34721100  | -3.88185900 | -0.00018200 |
| C | 0.33508700  | -3.44328000 | -0.00013300 |
| H | 0.14332300  | -4.51384800 | -0.00019000 |
| C | -4.67217500 | -3.32165200 | 0.00002000  |
| C | -5.90134800 | -2.39350900 | 0.00000800  |
| C | -4.74290100 | -4.21350600 | -1.26232500 |
| C | -4.74285900 | -4.21342900 | 1.26242200  |
| H | -5.92803300 | -1.75269000 | 0.88746900  |
| H | -5.92804000 | -1.75272500 | -0.88747800 |

---

---

|   |             |             |             |
|---|-------------|-------------|-------------|
| H | -6.81652800 | -2.99397500 | 0.00002500  |
| H | -3.91716000 | -4.92991100 | -1.30323800 |
| H | -5.67839300 | -4.78398000 | -1.27387700 |
| H | -4.70336500 | -3.60681000 | -2.17280600 |
| H | -5.67834500 | -4.78391100 | 1.27403900  |
| H | -3.91710700 | -4.92982000 | 1.30335300  |
| H | -4.70330100 | -3.60667500 | 2.17286500  |

---

**12** opt B3LYP/6-31G(d,p) HF = -1557.925811 Hartree imaginary frequency 0

---

|   |             |             |             |
|---|-------------|-------------|-------------|
| C | 2.61984300  | 2.19105900  | 0.09570100  |
| C | 1.84100900  | 1.03822700  | 0.08211600  |
| C | 0.44481800  | 1.17287300  | 0.02568200  |
| C | -0.18860300 | 2.40412500  | -0.04551300 |
| C | 0.62214100  | 3.55080000  | -0.03420500 |
| C | 2.01898900  | 3.46986100  | 0.04288000  |
| C | -2.29908200 | 1.06918900  | -0.10806000 |
| C | -1.57459600 | -0.15140000 | 0.00599000  |
| C | -2.31005600 | -1.35385300 | 0.16159200  |
| C | -3.71204000 | -1.29498800 | 0.14720900  |
| C | -4.44306100 | -0.11662100 | -0.02706000 |
| C | -3.69841200 | 1.05515300  | -0.13881000 |
| H | 3.70100800  | 2.10496700  | 0.14224900  |
| H | 0.11330000  | 4.50453400  | -0.09383800 |
| H | -4.22217100 | -2.24068600 | 0.29010300  |
| H | -4.16861400 | 2.02539100  | -0.24423300 |
| C | -1.65203500 | 2.41783200  | -0.15783900 |
| O | -2.30624100 | 3.45272000  | -0.27030600 |
| C | 0.83747600  | -1.04693700 | 0.02933200  |
| C | 2.09762200  | -0.39225800 | 0.07790500  |
| C | 0.78085800  | -2.44166800 | -0.08565600 |
| C | 3.28138500  | -1.12607500 | 0.06269000  |
| C | 1.99993800  | -3.14119700 | -0.12083200 |
| C | 3.25446500  | -2.52541100 | -0.03258600 |
| H | 4.22434500  | -0.59422600 | 0.11248100  |
| H | 1.91944900  | -4.21772400 | -0.22131300 |

---

---

|   |             |             |             |
|---|-------------|-------------|-------------|
| N | -0.17822700 | -0.07218100 | 0.02037000  |
| C | 2.91767700  | 4.72206600  | 0.06229800  |
| C | 3.87357500  | 4.69023100  | -1.15398200 |
| C | 2.10089600  | 6.02617900  | -0.00344400 |
| C | 3.74794500  | 4.73848900  | 1.36783300  |
| H | 4.52033800  | 3.80762000  | -1.14510800 |
| H | 3.31197900  | 4.68376600  | -2.09364400 |
| H | 4.52074900  | 5.57411300  | -1.15122800 |
| H | 1.41941100  | 6.12441700  | 0.84749000  |
| H | 2.77934400  | 6.88476200  | 0.01644400  |
| H | 1.51139300  | 6.09316300  | -0.92329800 |
| H | 4.39541100  | 5.62175400  | 1.39485800  |
| H | 3.09589600  | 4.76871300  | 2.24665900  |
| H | 4.38889300  | 3.85614500  | 1.45761000  |
| C | -5.97998600 | -0.15335400 | -0.06358000 |
| C | -6.51133000 | -0.72803300 | 1.27097300  |
| C | -6.58330700 | 1.24891200  | -0.26538500 |
| C | -6.44069900 | -1.05724300 | -1.23142300 |
| H | -6.14553400 | -1.74259800 | 1.45439600  |
| H | -6.20559100 | -0.10352400 | 2.11656000  |
| H | -7.60595800 | -0.76711400 | 1.25617400  |
| H | -6.25767900 | 1.70172900  | -1.20745600 |
| H | -7.67505200 | 1.17783100  | -0.29292500 |
| H | -6.31792100 | 1.92946000  | 0.54998300  |
| H | -7.53463100 | -1.10074200 | -1.26717800 |
| H | -6.08521700 | -0.67030000 | -2.19195300 |
| H | -6.07143400 | -2.08157800 | -1.12485400 |
| C | 4.53151400  | -3.38598600 | -0.05587000 |
| C | 5.80951800  | -2.53264500 | 0.04797200  |
| C | 4.50748300  | -4.36978800 | 1.13791200  |
| C | 4.58857200  | -4.18558500 | -1.37911300 |
| H | 5.90446100  | -1.83396700 | -0.79001600 |
| H | 5.84418300  | -1.95955200 | 0.98059400  |
| H | 6.68820400  | -3.18463100 | 0.03122800  |

---

---

|   |             |             |             |
|---|-------------|-------------|-------------|
| H | 3.64089300  | -5.03586400 | 1.09914100  |
| H | 5.40762000  | -4.99413000 | 1.13269400  |
| H | 4.47352100  | -3.83117000 | 2.09054700  |
| H | 5.48945500  | -4.80827500 | -1.40663300 |
| H | 3.72459500  | -4.84611200 | -1.49444400 |
| H | 4.61370100  | -3.51372100 | -2.24320800 |
| C | -1.77775100 | -2.72890000 | 0.41107500  |
| O | -2.44380500 | -3.54437000 | 1.02694500  |
| C | -0.45512400 | -3.24583100 | -0.18467400 |
| O | -0.45602900 | -4.37466700 | -0.64629400 |

---

**13** opt B3LYP/6-31G(d,p) HF = -1748.062872 Hartree imaginary frequency 0

---

|   |             |             |             |
|---|-------------|-------------|-------------|
| C | 4.16643400  | 0.32578500  | -0.20990500 |
| C | 2.78359100  | 0.45758700  | -0.13798700 |
| C | 1.99096300  | -0.69860200 | -0.21961900 |
| C | 2.53696900  | -1.97109100 | -0.30228500 |
| C | 3.93540300  | -2.07597900 | -0.37787600 |
| C | 4.76525300  | -0.94775200 | -0.34712300 |
| C | 0.18410400  | -2.74792600 | -0.01623600 |
| C | -0.30689300 | -1.41123600 | -0.02842900 |
| C | -1.70729800 | -1.19710600 | 0.06937800  |
| C | -2.51076900 | -2.31809600 | 0.32906400  |
| C | -2.04471800 | -3.63523200 | 0.41693900  |
| C | -0.68777600 | -3.82303400 | 0.19772500  |
| H | 4.79079800  | 1.21213100  | -0.15099700 |
| H | 4.34231900  | -3.07706600 | -0.44461500 |
| H | -3.56984700 | -2.12407800 | 0.42839800  |
| H | -0.22877700 | -4.80391300 | 0.19529800  |
| C | 1.62008400  | -3.11083400 | -0.22186500 |
| O | 1.99653000  | -4.28111800 | -0.28361600 |
| C | 0.54314200  | 1.01189800  | 0.03483300  |
| C | 1.85485400  | 1.55612600  | 0.05154700  |
| C | -0.57337800 | 1.84830800  | 0.16170400  |
| C | 2.06935900  | 2.91799900  | 0.25424500  |
| C | -0.30411100 | 3.21061500  | 0.38850600  |

---

---

|   |             |             |             |
|---|-------------|-------------|-------------|
| C | 0.98013000  | 3.77093100  | 0.45054800  |
| H | 3.08607900  | 3.29276400  | 0.26697400  |
| H | -1.17165300 | 3.84856400  | 0.48956500  |
| N | 0.64104000  | -0.38588800 | -0.13906700 |
| C | 6.30067900  | -1.04970500 | -0.43632600 |
| C | 6.93492500  | -0.45750000 | 0.84465100  |
| C | 6.78047100  | -2.50625000 | -0.57929100 |
| C | 6.79716600  | -0.25618900 | -1.66830900 |
| H | 6.67224300  | 0.59560700  | 0.98347600  |
| H | 6.60444100  | -1.00426000 | 1.73364500  |
| H | 8.02749400  | -0.52170300 | 0.79286200  |
| H | 6.38359000  | -2.97927200 | -1.48310100 |
| H | 7.87278700  | -2.52787900 | -0.64707400 |
| H | 6.49118100  | -3.11781600 | 0.28118100  |
| H | 7.88865500  | -0.31464900 | -1.74431400 |
| H | 6.37036400  | -0.66011500 | -2.59199100 |
| H | 6.52550900  | 0.80220600  | -1.61022300 |
| C | -3.02603100 | -4.78199100 | 0.71246700  |
| C | -4.09720700 | -4.84469700 | -0.40208200 |
| C | -2.31230500 | -6.14493400 | 0.77727800  |
| C | -3.71611100 | -4.52791600 | 2.07323100  |
| H | -4.66264900 | -3.91113100 | -0.47777500 |
| H | -3.63655000 | -5.03582900 | -1.37667700 |
| H | -4.81000800 | -5.65178100 | -0.19901900 |
| H | -1.54944600 | -6.16799500 | 1.56210500  |
| H | -3.04029500 | -6.93184400 | 0.99892700  |
| H | -1.83080300 | -6.39870900 | -0.17243100 |
| H | -4.42551000 | -5.33275000 | 2.29575100  |
| H | -2.98155400 | -4.48940800 | 2.88422800  |
| H | -4.27107900 | -3.58499400 | 2.07910200  |
| C | 1.13593100  | 5.28148400  | 0.70841000  |
| C | 2.61375100  | 5.71361300  | 0.75087700  |
| C | 0.43347700  | 6.07387300  | -0.41950900 |
| C | 0.48896000  | 5.64067500  | 2.06682500  |

---

---

|   |             |             |             |
|---|-------------|-------------|-------------|
| H | 3.16521700  | 5.20338800  | 1.54762600  |
| H | 3.12349200  | 5.51945900  | -0.19870700 |
| H | 2.67777000  | 6.78922500  | 0.94317700  |
| H | -0.63330800 | 5.83996500  | -0.47758500 |
| H | 0.53058800  | 7.15138300  | -0.24517200 |
| H | 0.87847600  | 5.84602800  | -1.39360500 |
| H | 0.58593300  | 6.71443500  | 2.26275900  |
| H | -0.57611500 | 5.39296700  | 2.08773300  |
| H | 0.97370900  | 5.10075000  | 2.88680100  |
| C | -1.98813000 | 1.44203800  | -0.03920300 |
| C | -2.46833400 | 0.07763800  | -0.17095700 |
| C | -4.13680700 | 2.23389400  | -0.43510300 |
| C | -5.04644500 | 3.31553200  | -0.54749500 |
| C | -4.59037000 | 0.90585300  | -0.65648600 |
| C | -6.35835100 | 3.06661800  | -0.88699500 |
| H | -4.67814500 | 4.32043600  | -0.36872400 |
| C | -5.94225300 | 0.67506800  | -1.01530000 |
| C | -6.80705600 | 1.74197900  | -1.12638300 |
| H | -7.06008700 | 3.89021100  | -0.97824400 |
| H | -6.26289600 | -0.34722800 | -1.18723900 |
| H | -7.84482900 | 1.57282700  | -1.39728200 |
| N | -2.83334800 | 2.45545400  | -0.14954700 |
| N | -3.73299800 | -0.13094500 | -0.50663100 |

---

**14** opt B3LYP/6-31G(d,p) HF = -1901.704441 Hartree imaginary frequency 0

---

|   |             |             |             |
|---|-------------|-------------|-------------|
| C | -4.68073300 | -1.18816600 | -0.32924800 |
| C | -3.31016100 | -0.99798000 | -0.18726800 |
| C | -2.80050200 | 0.30849900  | -0.25100700 |
| C | -3.61839600 | 1.42073600  | -0.38415100 |
| C | -4.99780100 | 1.20110900  | -0.53007500 |
| C | -5.54751700 | -0.08734900 | -0.51926700 |
| C | -1.52335800 | 2.71947900  | -0.00374600 |
| C | -0.73886000 | 1.53063100  | 0.03235500  |
| C | 0.66726800  | 1.64538500  | 0.19483900  |
| C | 1.17890700  | 2.92436000  | 0.46853500  |

---

---

|   |             |             |             |
|---|-------------|-------------|-------------|
| C | 0.42004100  | 4.09897600  | 0.51011500  |
| C | -0.93249500 | 3.96743900  | 0.22757000  |
| H | -5.08746000 | -2.19389100 | -0.28482900 |
| H | -5.61906000 | 2.08152500  | -0.63543500 |
| H | 2.24821000  | 2.97901400  | 0.61952800  |
| H | -1.60349400 | 4.81651200  | 0.18632400  |
| C | -2.99241800 | 2.74128400  | -0.28142300 |
| O | -3.62380900 | 3.79304200  | -0.38191000 |
| C | -1.01324400 | -1.02154900 | 0.10386700  |
| C | -2.16548300 | -1.85254900 | 0.06679900  |
| C | 0.25672600  | -1.57975900 | 0.30167200  |
| C | -2.07436800 | -3.22499500 | 0.28481000  |
| C | 0.29256400  | -2.96700200 | 0.54071500  |
| C | -0.83046600 | -3.80522600 | 0.55061600  |
| H | -2.97826000 | -3.82204200 | 0.25546500  |
| H | 1.27654100  | -3.38811100 | 0.69659900  |
| N | -1.42010700 | 0.31462300  | -0.09916900 |
| C | -7.05868900 | -0.34154900 | -0.68521200 |
| C | -7.60637400 | -1.04995500 | 0.57653700  |
| C | -7.85072300 | 0.96438700  | -0.88380700 |
| C | -7.29554800 | -1.24081500 | -1.92180900 |
| H | -7.11687000 | -2.01286000 | 0.75134900  |
| H | -7.45666600 | -0.43237600 | 1.46796600  |
| H | -8.68036300 | -1.23926600 | 0.47068600  |
| H | -7.52485500 | 1.50690100  | -1.77691600 |
| H | -8.91377500 | 0.73387400  | -1.00626700 |
| H | -7.75558400 | 1.63460000  | -0.02365000 |
| H | -8.36600700 | -1.43512700 | -2.05167800 |
| H | -6.92490100 | -0.75951100 | -2.83256400 |
| H | -6.79263600 | -2.20802600 | -1.82726700 |
| C | 1.09638500  | 5.44354900  | 0.82668700  |
| C | 2.17377800  | 5.74301700  | -0.24244300 |
| C | 0.08572700  | 6.60534800  | 0.83659300  |
| C | 1.76381700  | 5.36626200  | 2.21986900  |

---



---

|   |             |             |             |
|---|-------------|-------------|-------------|
| H | 2.94102200  | 4.96387900  | -0.27778500 |
| H | 1.72606600  | 5.81598700  | -1.23883800 |
| H | 2.67239800  | 6.69388900  | -0.02351100 |
| H | -0.69714200 | 6.45745700  | 1.58739800  |
| H | 0.60197700  | 7.54065800  | 1.07532200  |
| H | -0.39720500 | 6.73430200  | -0.13724700 |
| H | 2.25743700  | 6.31505800  | 2.45782800  |
| H | 1.02189600  | 5.16505900  | 2.99951100  |
| H | 2.52057100  | 4.57745000  | 2.26622800  |
| C | -0.65129100 | -5.30945300 | 0.82978800  |
| C | -1.99222900 | -6.06707400 | 0.81069500  |
| C | 0.26906600  | -5.92913500 | -0.24836600 |
| C | -0.00881400 | -5.50066500 | 2.22387900  |
| H | -2.68493900 | -5.68957300 | 1.57025300  |
| H | -2.48411400 | -6.00253300 | -0.16559500 |
| H | -1.81946700 | -7.12724900 | 1.02095400  |
| H | 1.25614800  | -5.45834500 | -0.25995500 |
| H | 0.41088600  | -6.99905200 | -0.05860500 |
| H | -0.16618200 | -5.81607800 | -1.24665400 |
| H | 0.13180200  | -6.56660200 | 2.43541400  |
| H | 0.96928200  | -5.01580200 | 2.29050200  |
| H | -0.64462500 | -5.07959000 | 3.00956800  |
| C | 1.55186500  | -0.86708400 | 0.16401600  |
| C | 1.71269700  | 0.58157300  | 0.01190900  |
| C | 3.84661300  | -1.14529300 | -0.10414900 |
| C | 4.96603600  | -1.97993800 | -0.13385300 |
| C | 3.99190000  | 0.25557500  | -0.35829600 |
| C | 6.23529000  | -1.45996700 | -0.42786100 |
| H | 4.83272300  | -3.03894100 | 0.06530600  |
| C | 5.24810200  | 0.78335000  | -0.66380500 |
| C | 7.40050800  | -2.28601900 | -0.47014200 |
| C | 6.37889600  | -0.04585500 | -0.70562700 |
| H | 5.33286700  | 1.84813700  | -0.85874000 |
| C | 8.62933200  | -1.75692000 | -0.76639500 |

---

---

|   |            |             |             |
|---|------------|-------------|-------------|
| H | 7.29081900 | -3.34676800 | -0.26202700 |
| C | 7.67913200 | 0.46241600  | -1.00996400 |
| C | 8.77048900 | -0.36571500 | -1.03977400 |
| H | 9.50567400 | -2.39752600 | -0.79469000 |
| H | 7.78434800 | 1.52361500  | -1.21808200 |
| H | 9.75237900 | 0.03514300  | -1.27281100 |
| N | 2.90203800 | 1.06955300  | -0.27681700 |
| N | 2.60621500 | -1.65536400 | 0.12986700  |

---

*tert*-butylated **1** opt B3LYP/6-31G(d,p) HF = -1557.972702 Hartree imaginary frequency 0

---

|   |             |             |             |
|---|-------------|-------------|-------------|
| C | -0.25631400 | 3.70949600  | -0.00000600 |
| C | -0.63524500 | 2.36045300  | -0.00000600 |
| C | 0.34664000  | 1.34793500  | -0.00000200 |
| C | 1.70360500  | 1.74312600  | 0.00000100  |
| C | 2.03629700  | 3.09972900  | -0.00000100 |
| C | 1.07738200  | 4.11924200  | -0.00000400 |
| C | 2.35614700  | -0.65628700 | 0.00000600  |
| C | 0.98572900  | -1.00225700 | 0.00000300  |
| C | 0.65082300  | -2.37219300 | 0.00000400  |
| C | 1.66035000  | -3.34401900 | 0.00000700  |
| C | 3.01801800  | -3.02255200 | 0.00001000  |
| C | 3.32948000  | -1.65798000 | 0.00000900  |
| H | -1.07346700 | 4.42061800  | -0.00001000 |
| H | 3.09888700  | 3.31962400  | 0.00000200  |
| H | 1.31522700  | -4.37084200 | 0.00000800  |
| H | 4.35734600  | -1.31030600 | 0.00001100  |
| C | 2.79456400  | 0.75127100  | 0.00000900  |
| O | 3.98171300  | 1.07431500  | -0.00000400 |
| C | -1.36728500 | -0.38111700 | -0.00000400 |
| C | -2.38749000 | 0.59682700  | -0.00000800 |
| C | -1.75257500 | -1.73777900 | -0.00000300 |
| C | -3.72859400 | 0.20668200  | -0.00000900 |
| C | -3.11032800 | -2.08409000 | -0.00000600 |
| C | -4.13182400 | -1.13363600 | -0.00000900 |
| H | -4.45042400 | 1.01685700  | -0.00001200 |

---

---

|   |             |             |             |
|---|-------------|-------------|-------------|
| H | -3.31769800 | -3.14732300 | -0.00000500 |
| N | -0.01134300 | -0.01151700 | -0.00000100 |
| C | 1.50929400  | 5.59487500  | -0.00000400 |
| C | 0.30118500  | 6.54966600  | -0.00001800 |
| C | 2.35767500  | 5.87785100  | 1.26231700  |
| C | 2.35770100  | 5.87784700  | -1.26230800 |
| H | -0.32658800 | 6.41441900  | -0.88670100 |
| H | -0.32660200 | 6.41442800  | 0.88665500  |
| H | 0.65273300  | 7.58606600  | -0.00002100 |
| H | 3.25412900  | 5.25192100  | 1.29996800  |
| H | 2.68188300  | 6.92411100  | 1.27318900  |
| H | 1.78000100  | 5.69240000  | 2.17366900  |
| H | 2.68190800  | 6.92410700  | -1.27317700 |
| H | 3.25415700  | 5.25191800  | -1.29993900 |
| H | 1.78004600  | 5.69239200  | -2.17367100 |
| C | 4.13728600  | -4.07669400 | 0.00001500  |
| C | 5.01228600  | -3.89141500 | -1.26229900 |
| C | 5.01228200  | -3.89140700 | 1.26233100  |
| C | 3.57855700  | -5.51157200 | 0.00001900  |
| H | 4.42023200  | -4.02385300 | -2.17367100 |
| H | 5.46876600  | -2.89788400 | -1.30008200 |
| H | 5.82140100  | -4.62973900 | -1.27317400 |
| H | 4.42022400  | -4.02383700 | 2.17370100  |
| H | 5.82139600  | -4.62973300 | 1.27321400  |
| H | 5.46876300  | -2.89787700 | 1.30010800  |
| H | 4.40627900  | -6.22751600 | 0.00002300  |
| H | 2.96863500  | -5.71259400 | 0.88667700  |
| H | 2.96863800  | -5.71260000 | -0.88664100 |
| C | -5.62583900 | -1.49700500 | -0.00000900 |
| C | -6.29492500 | -0.90351300 | -1.26231800 |
| C | -5.84923200 | -3.02052800 | -0.00002700 |
| C | -6.29491400 | -0.90354300 | 1.26232000  |
| H | -6.20048700 | 0.18575700  | -1.30023600 |
| H | -5.84583000 | -1.31147800 | -2.17366200 |

---

---

|   |             |             |             |
|---|-------------|-------------|-------------|
| H | -7.36325800 | -1.14528400 | -1.27302800 |
| H | -5.41833300 | -3.49669900 | 0.88662900  |
| H | -6.92263300 | -3.23390800 | -0.00003100 |
| H | -5.41833000 | -3.49667800 | -0.88669400 |
| H | -7.36324700 | -1.14531000 | 1.27303400  |
| H | -5.84581200 | -1.31153300 | 2.17365100  |
| H | -6.20047000 | 0.18572500  | 1.30026400  |
| C | -0.75317100 | -2.82092100 | 0.00000200  |
| O | -1.06714300 | -4.01090200 | -0.00000300 |
| C | -2.07312800 | 2.03740600  | -0.00001400 |
| O | -2.94640600 | 2.90432200  | 0.00000600  |

---

## 9. References

- [S1] K. Yamamoto, S. Higashibayashi, *Chem. Eur. J.* **2016**, *22*, 663-671.
- [S2] M. J. Frisch, G. W. Trucks, H. B. Schlegel, G. E. Scuseria, M. A. Robb, J. R. Cheeseman, G. Scalmani, V. Barone, G. A. Petersson, H. Nakatsuji, X. Li, M. Caricato, A. V. Marenich, J. Bloino, B. G. Janesko, R. Gomperts, B. Mennucci, H. P. Hratchian, J. V. Ortiz, A. F. Izmaylov, J. L. Sonnenberg, D. Williams-Young, F. Ding, F. Lipparini, F. Egidi, J. Goings, B. Peng, A. Petrone, T. Henderson, D. Ranasinghe, V. G. Zakrzewski, J. Gao, N. Rega, G. Zheng, W. Liang, M. Hada, M. Ehara, K. Toyota, R. Fukuda, J. Hasegawa, M. Ishida, T. Nakajima, Y. Honda, O. Kitao, H. Nakai, T. Vreven, K. Throssell, J. A. Montgomery, Jr., J. E. Peralta, F. Ogliaro, M. J. Bearpark, J. J. Heyd, E. N. Brothers, K. N. Kudin, V. N. Staroverov, T. A. Keith, R. Kobayashi, J. Normand, K. Raghavachari, A. P. Rendell, J. C. Burant, S. S. Iyengar, J. Tomasi, M. Cossi, J. M. Millam, M. Klene, C. Adamo, R. Cammi, J. W. Ochterski, R. L. Martin, K. Morokuma, O. Farkas, J. B. Foresman, and D. J. Fox, *Gaussian 16, Revision A.03*, Gaussian, Inc., Wallingford CT, **2016**.
- [S3] (a) T. Lu, F. Chen, *J. Comput. Chem.* **2012**, *33*, 580. (b) H. Fallah-Bagher-Shaidaei, C. S. Wannere, C. Corminboeuf, R. Puchta, P. v. R. Schleyer, *Org. Lett.* **2006**, *8*, 863. (c) S. Klod, E. Kleinpeter, *J. Chem. Soc., Perkin Trans. 2* **2001**, 1893. (d) Z. Liu, T. Lu, Q. Chen, *Carbon* **2020**, *165*, 468.
